# Supplementary material for: Stereoselective convergent total synthesis of oxylipins
Source: Royal Society of Chemistry journal article supplement (doi:10.1039/d4ob00282b), 2024-01-01

## Supporting Information

### **Stereoselective Convergent Total Synthesis of Oxylipins**

Rodney A. Fernandes,\* Sandhya S. Yadav and Sanjita Moharana

Department of Chemistry, Indian Institute of Technology Bombay, Powai, Mumbai 400076,

Maharashtra, India

Email: [rfernand@chem.iitb.ac.in](mailto:rfernand@chem.iitb.ac.in)

#### **Table of Contents**

<sup>1</sup>H, <sup>13</sup>C NMR and HRMS spectral of all compounds S2–S50

$^1\text{H}$  NMR (500 MHz,  $\text{CDCl}_3$ ) and  $^{13}\text{C}\{^1\text{H}\}$  NMR (125 MHz,  $\text{CDCl}_3$ ) of compound **3**

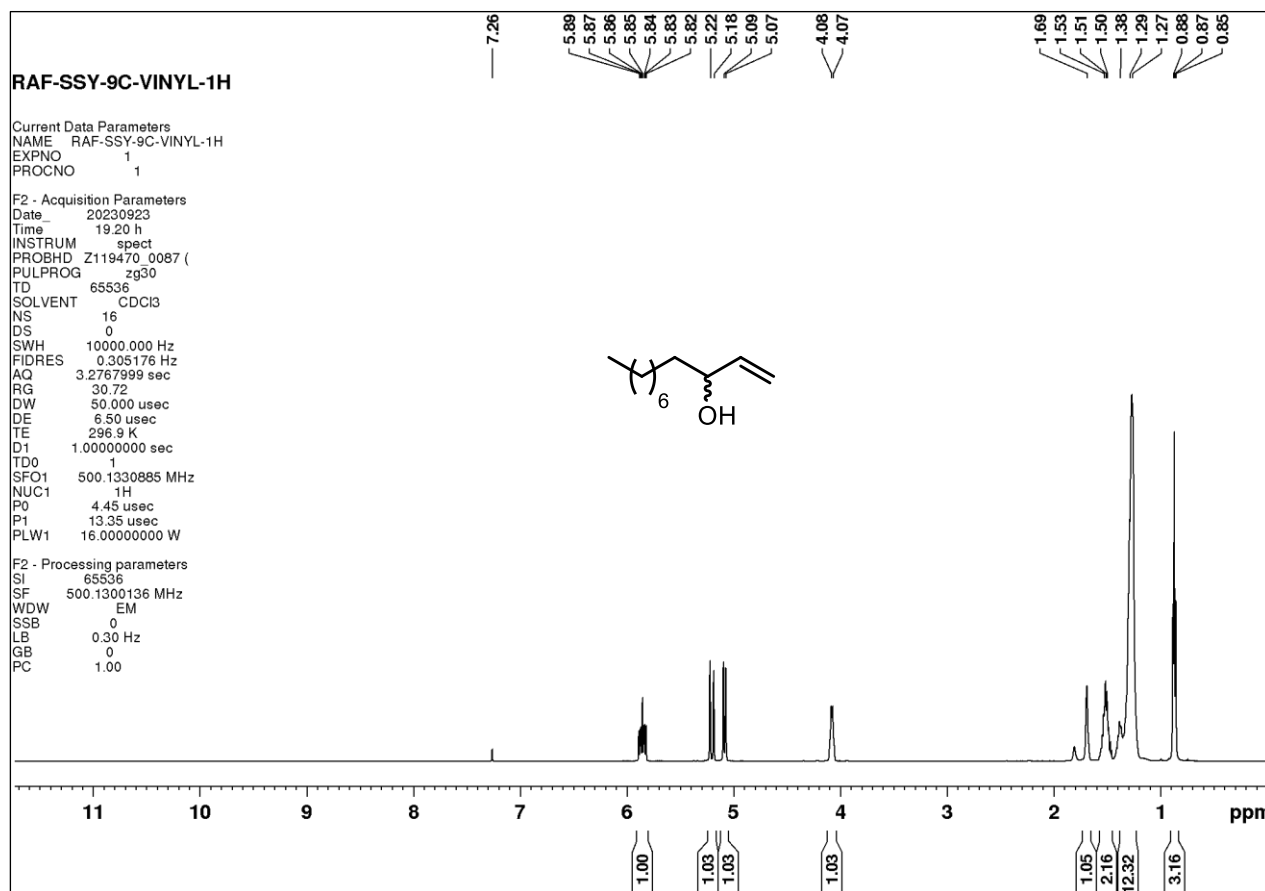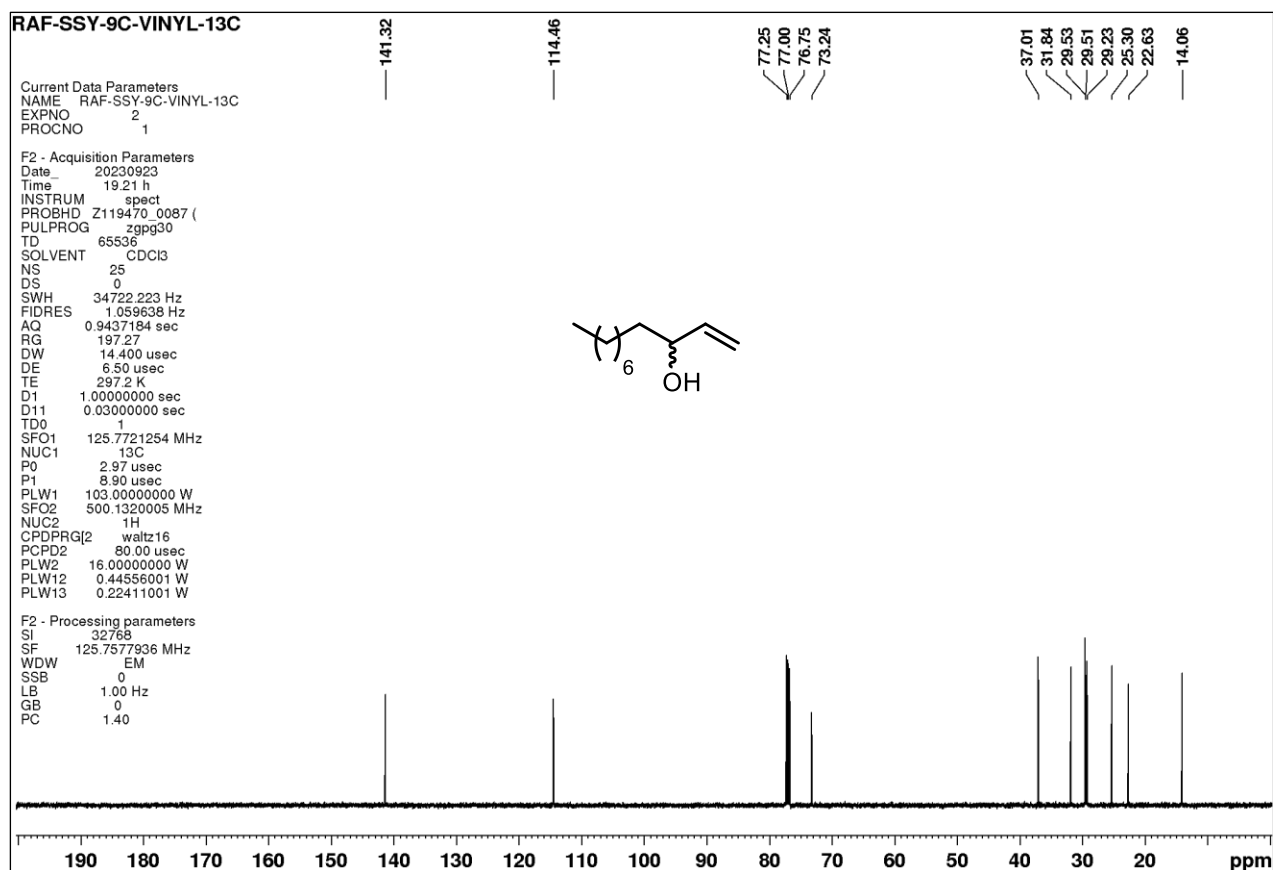

$^1\text{H}$  NMR (400 MHz,  $\text{CDCl}_3$ ) and  $^{13}\text{C}\{^1\text{H}\}$  NMR (100 MHz,  $\text{CDCl}_3$ ) of compound **10**

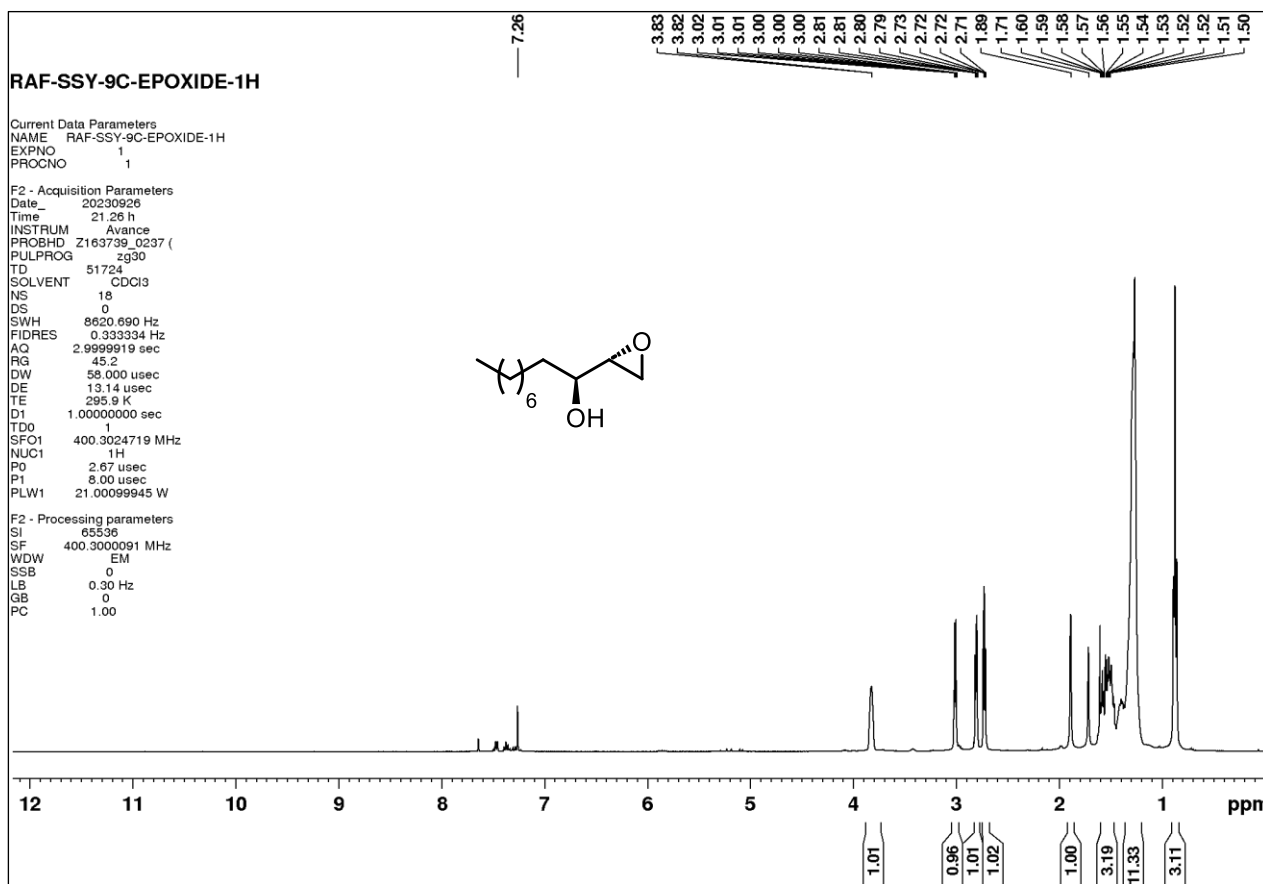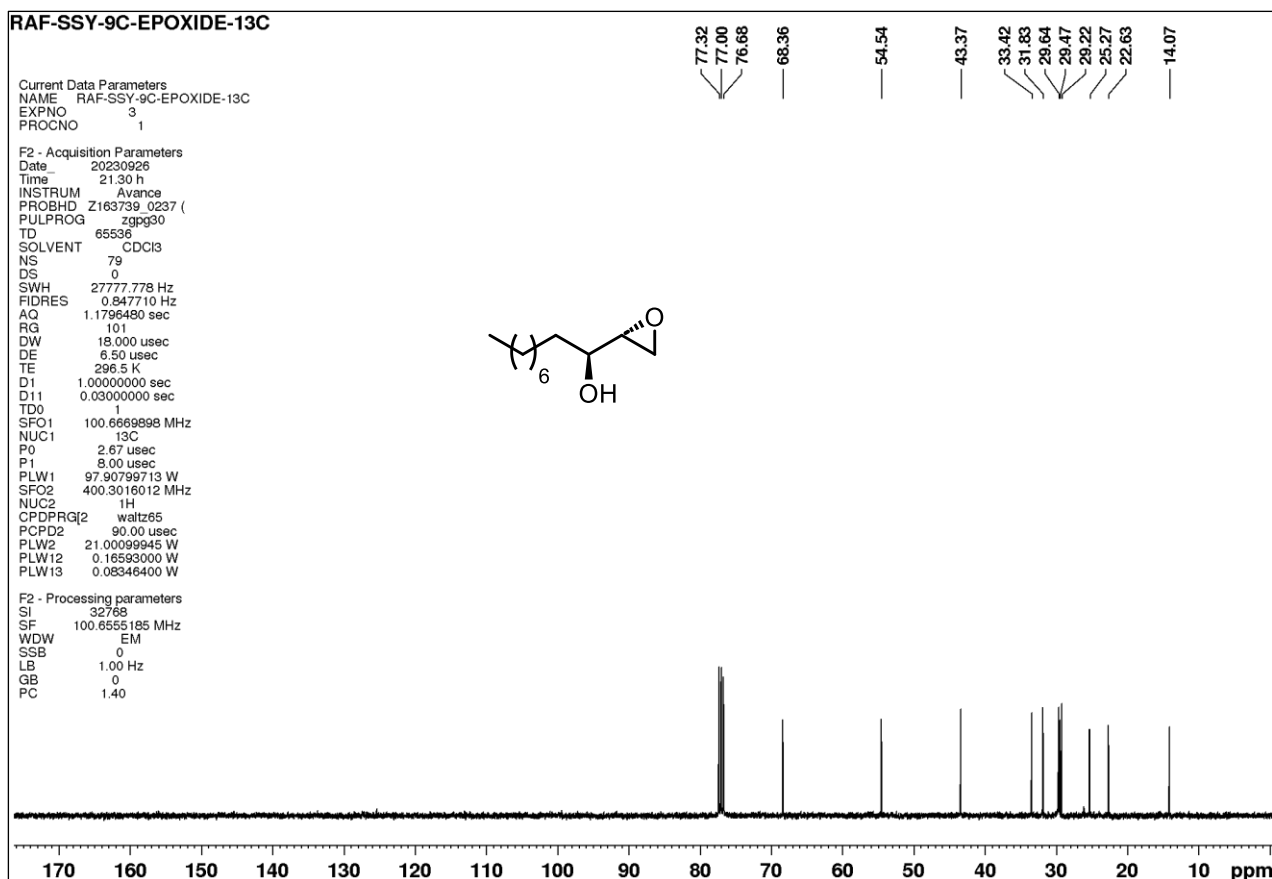

10: HRMS (ESI-TOF)  $m/z$ :  $[M + H]^+$  calcd for  $C_{11}H_{23}O_2$  187.1693; Found 187.1684

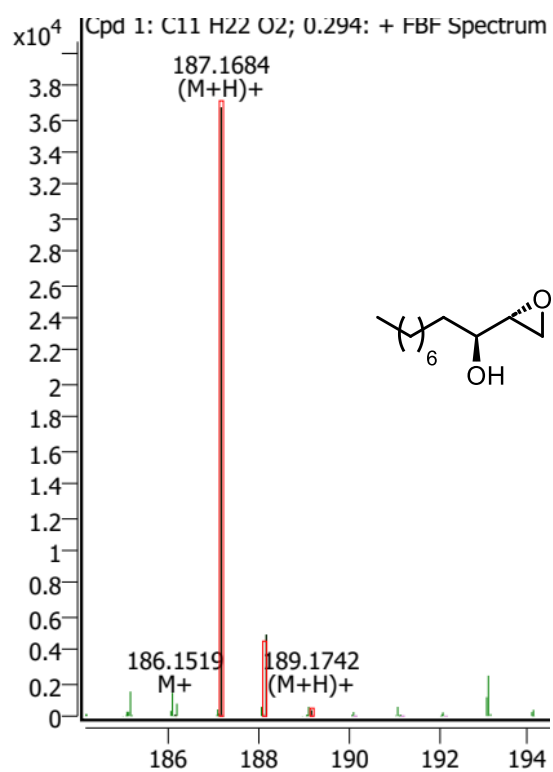

<sup>1</sup>H NMR (400 MHz, CDCl<sub>3</sub>) and <sup>13</sup>C{<sup>1</sup>H} NMR (100 MHz, CDCl<sub>3</sub>) of compound **10'**

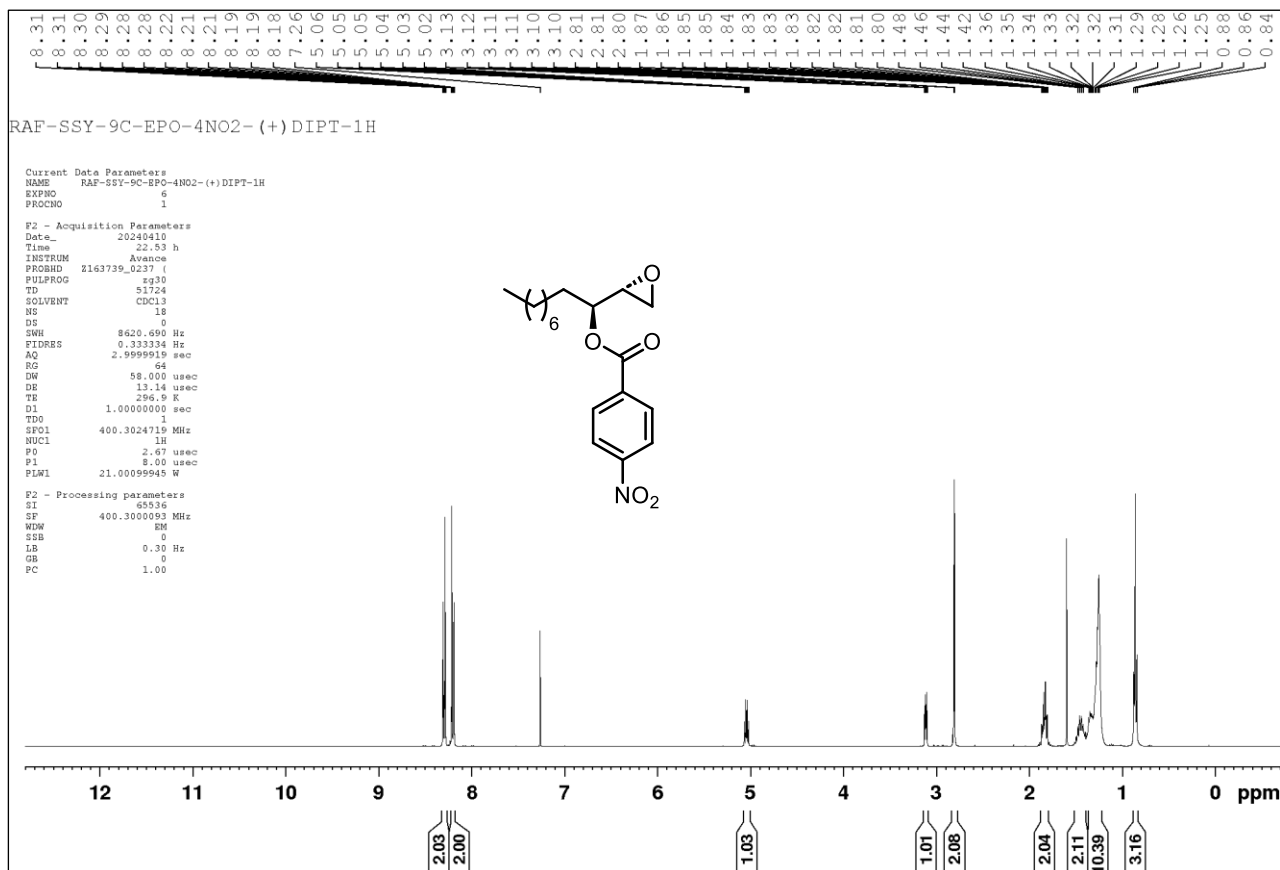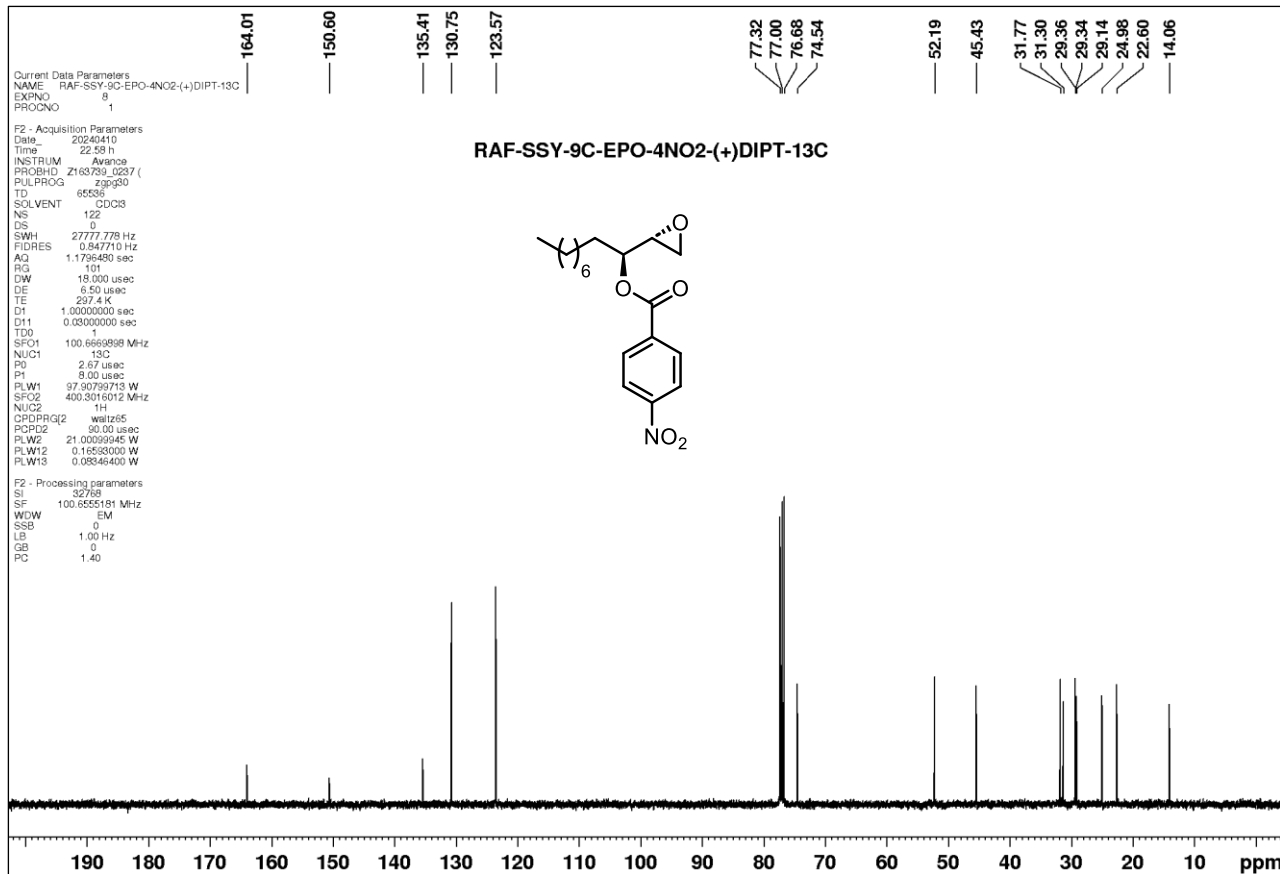

10': HRMS (ESI-TOF)  $m/z$ :  $[M + H]^+$  calcd for  $C_{18}H_{26}NO_5$  336.1806; Found 336.1808.

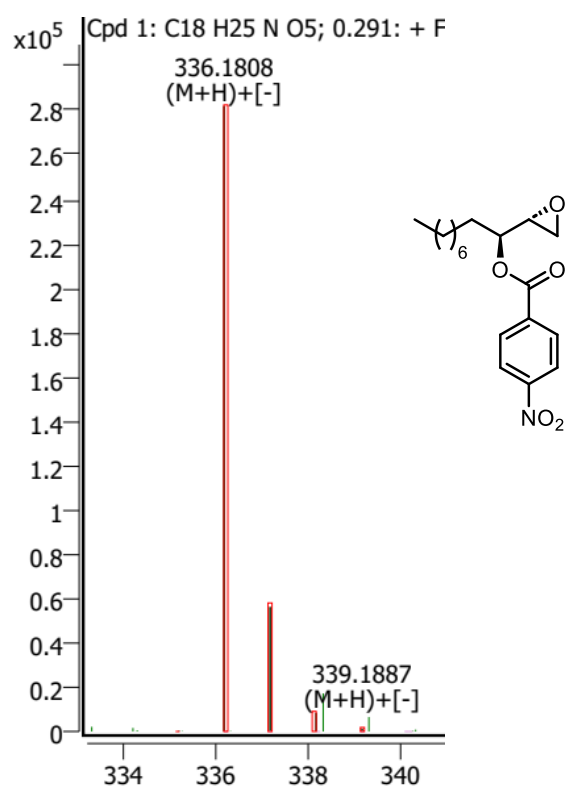

## HPLC chromatograms of racemic and chiral **10'** (96% *ee*)

**Note:** The racemic (bonds shown are relative) required was prepared by manual mixing of the two enantiomers prepared separately. Hence the ratio may not be exactly 50:50.

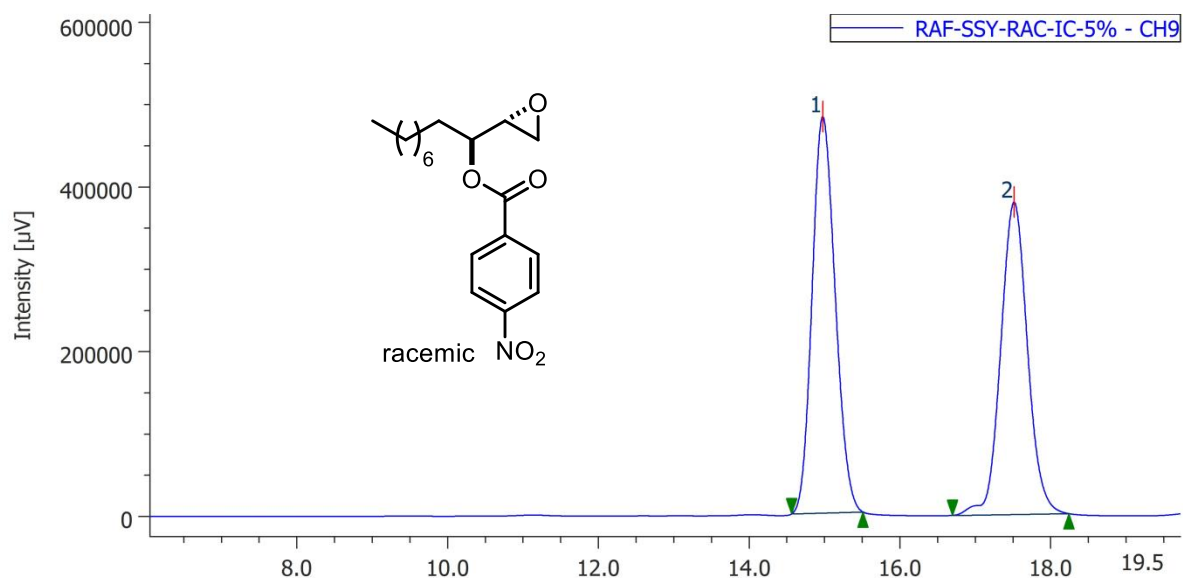

| #     | Peak Name | CH | tR [min] | Area [µV·sec] | Height [µV] | Area%  | Height% | Quantity | NTP   | Resolution | Symmetry Factor | Warning |
|-------|-----------|----|----------|---------------|-------------|--------|---------|----------|-------|------------|-----------------|---------|
| 1     | Unknown   | 9  | 14.973   | 10228431      | 481157      | 52.192 | 55.925  | N/A      | 11197 | 4.226      | 1.137           |         |
| 2     | Unknown   | 9  | 17.510   | 9369104       | 379205      | 47.808 | 44.075  | N/A      | 12068 | N/A        | 1.077           |         |
| Total |           |    |          | 19597535      | 860362      |        |         | 0.00000  |       |            |                 |         |

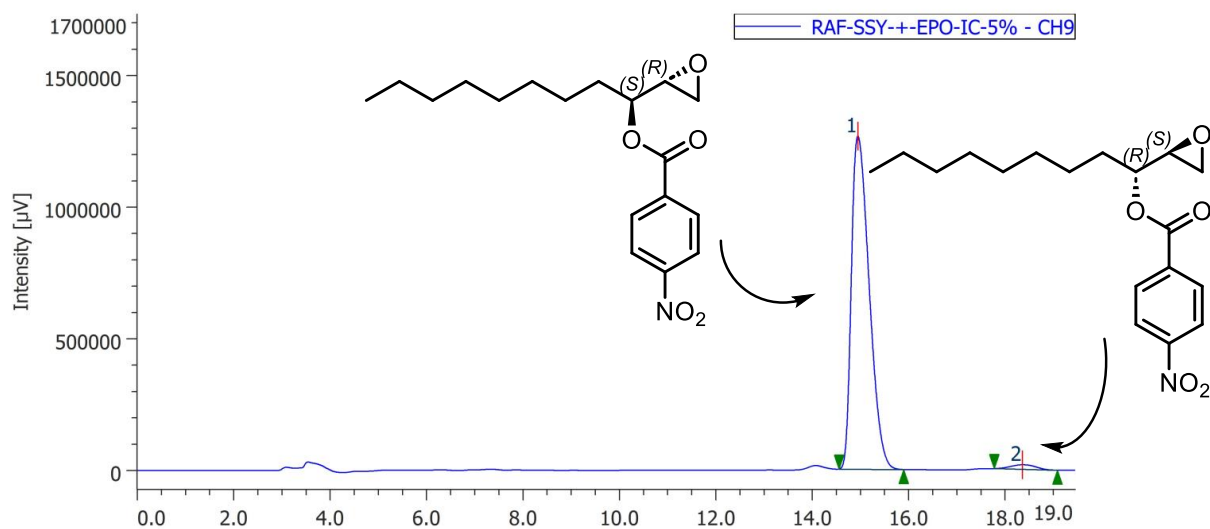

| #     | Peak Name | CH | tR [min] | Area [µV·sec] | Height [µV] | Area%  | Height% | Quantity | NTP  | Resolution | Symmetry Factor | Warning |
|-------|-----------|----|----------|---------------|-------------|--------|---------|----------|------|------------|-----------------|---------|
| 1     | Unknown   | 9  | 14.940   | 32375922      | 1264661     | 98.104 | 98.650  | N/A      | 7619 | 4.058      | 1.540           |         |
| 2     | Unknown   | 9  | 18.357   | 625808        | 17308       | 1.896  | 1.350   | N/A      | 5353 | N/A        | 1.007           |         |
| Total |           |    |          | 33001730      | 1281969     |        |         | 0.00000  |      |            |                 |         |

$^1\text{H}$  NMR (400 MHz,  $\text{CDCl}_3$ ) and  $^{13}\text{C}\{^1\text{H}\}$  NMR (100 MHz,  $\text{CDCl}_3$ ) of compound **9**

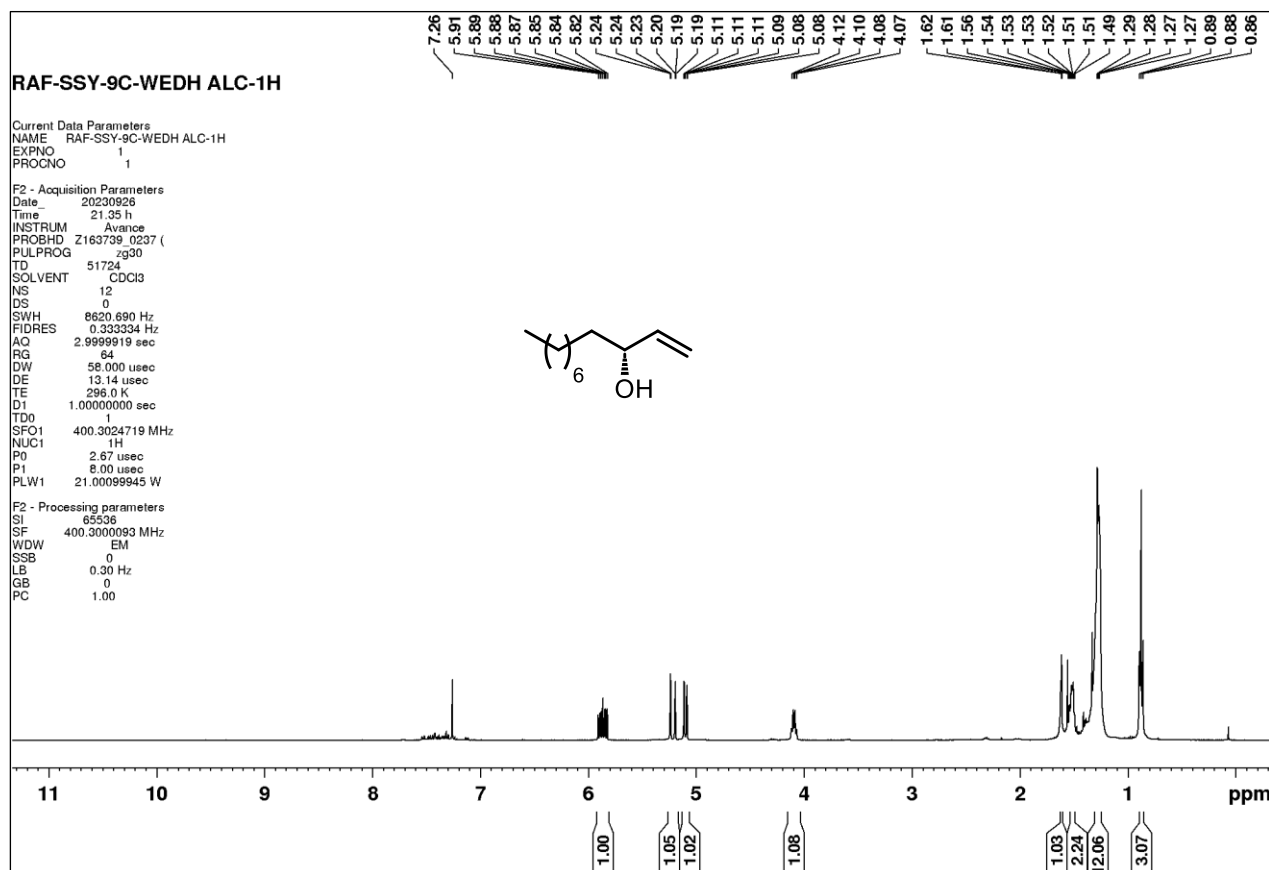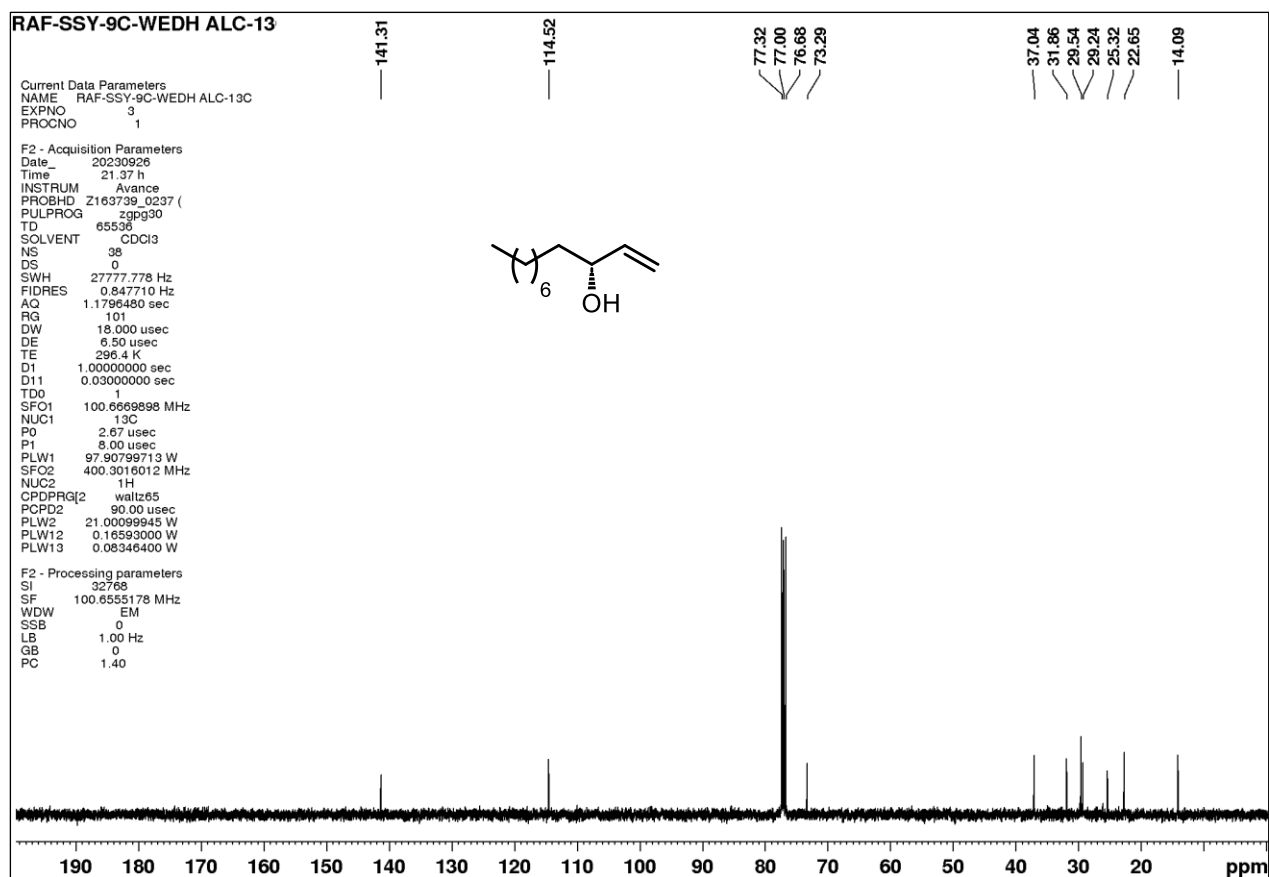



9: HRMS (ESI-TOF)  $m/z$ :  $[M + Na]^+$  calcd for  $C_{11}H_{22}ONa$  193.1564; Found 193.1578

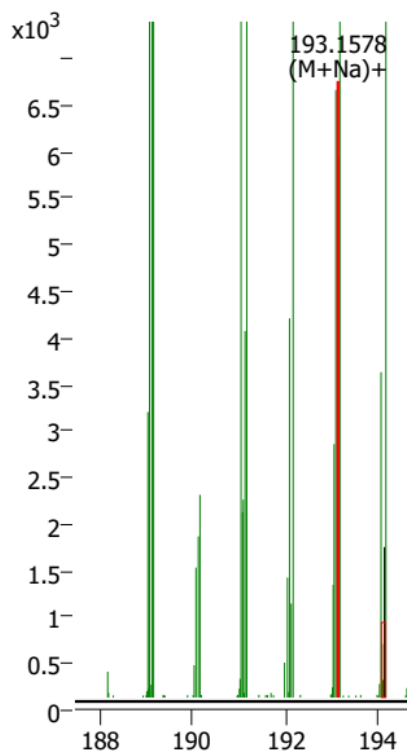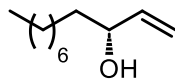

$^1\text{H}$  NMR (400 MHz,  $\text{CDCl}_3$ ) and  $^{13}\text{C}\{^1\text{H}\}$  NMR (100 MHz,  $\text{CDCl}_3$ ) of compound **2**

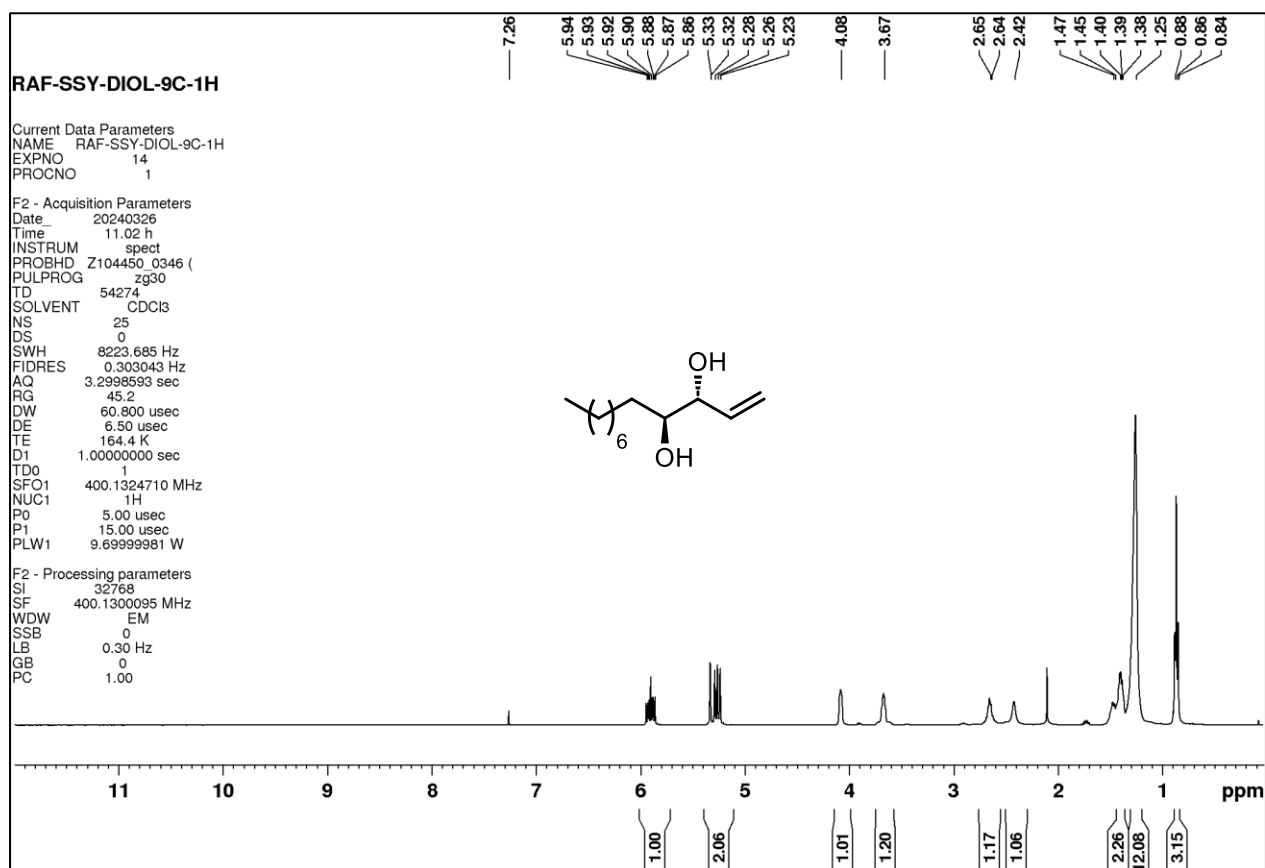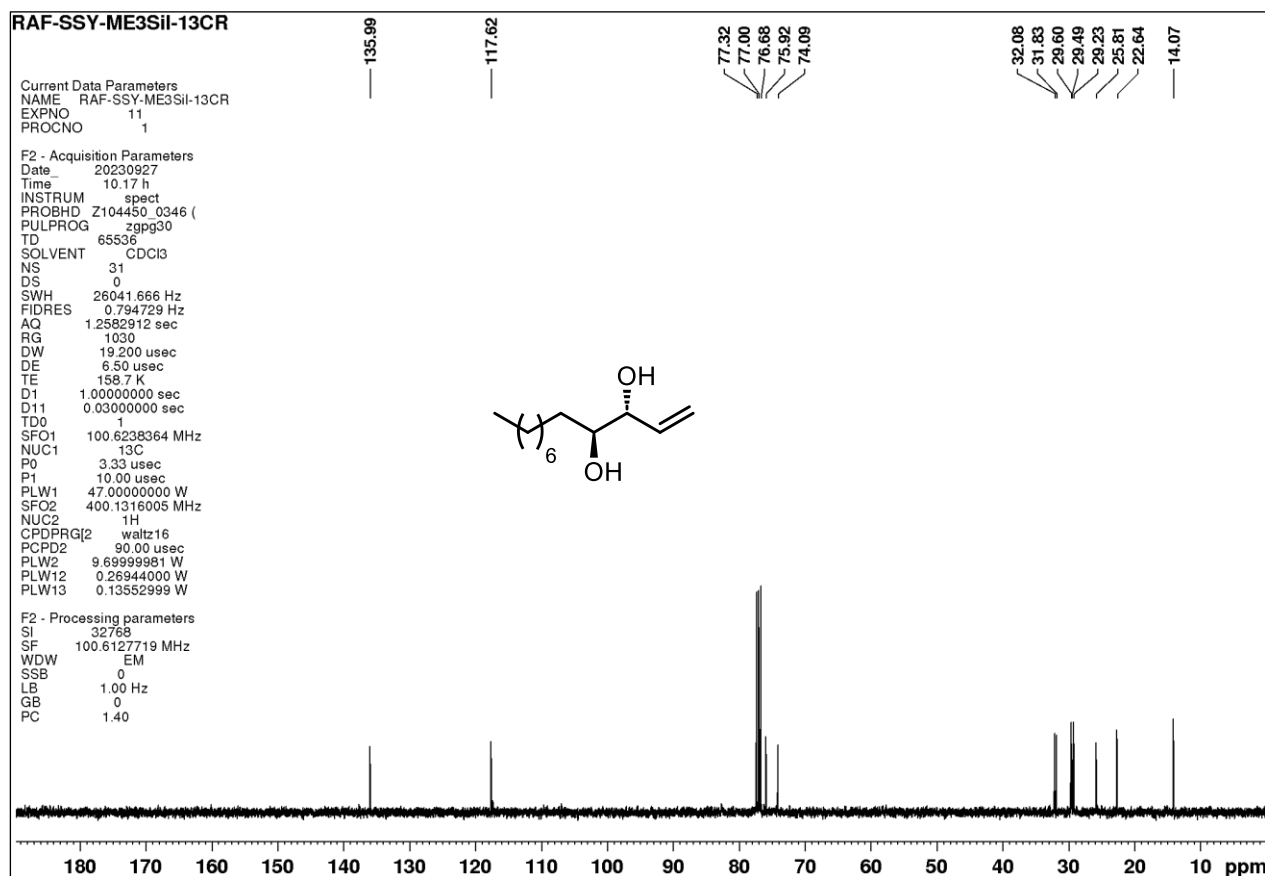

2: HRMS (ESI-TOF)  $m/z$ :  $[M + H]^+$  calcd for  $C_{12}H_{25}O_2$  201.1849; Found 201.1842

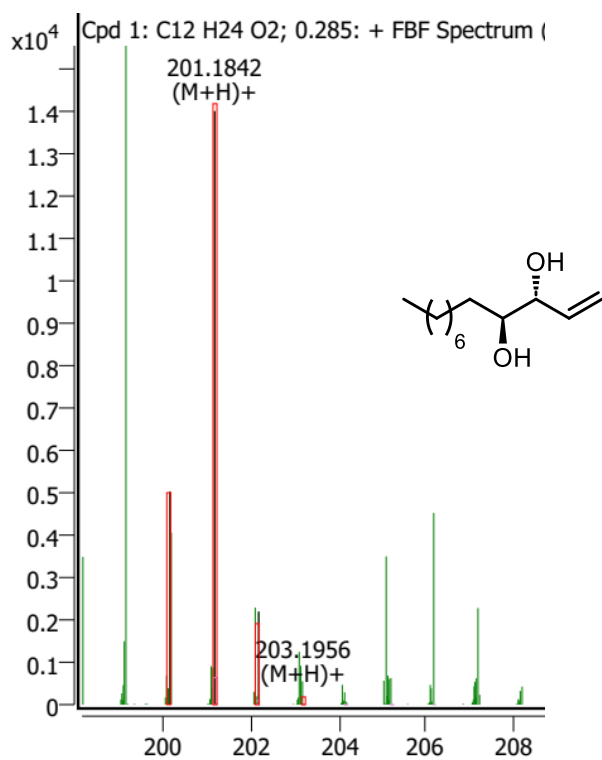

$^1\text{H}$  NMR (500 MHz,  $\text{CDCl}_3$ ) and  $^{13}\text{C}\{^1\text{H}\}$  NMR (125 MHz,  $\text{CDCl}_3$ ) of compound **11**

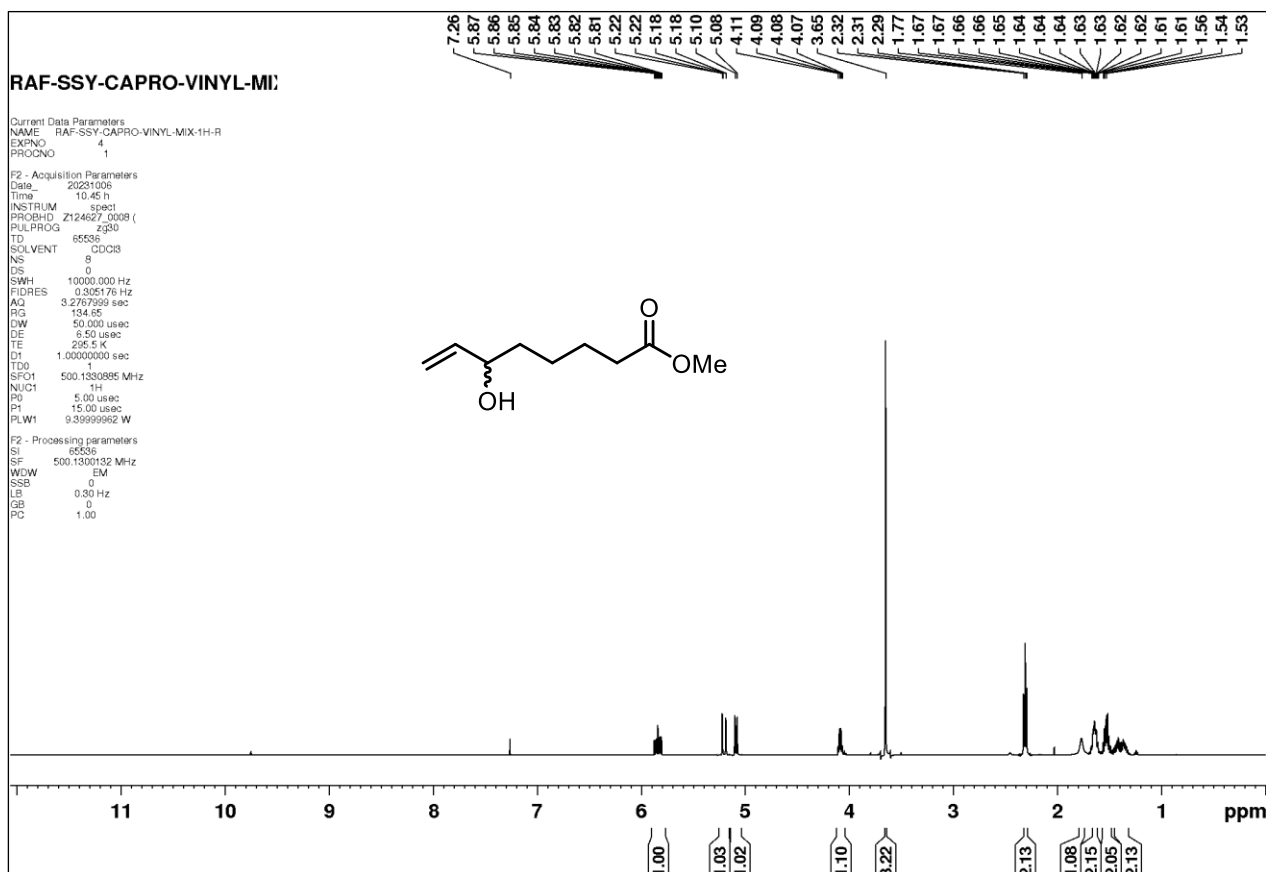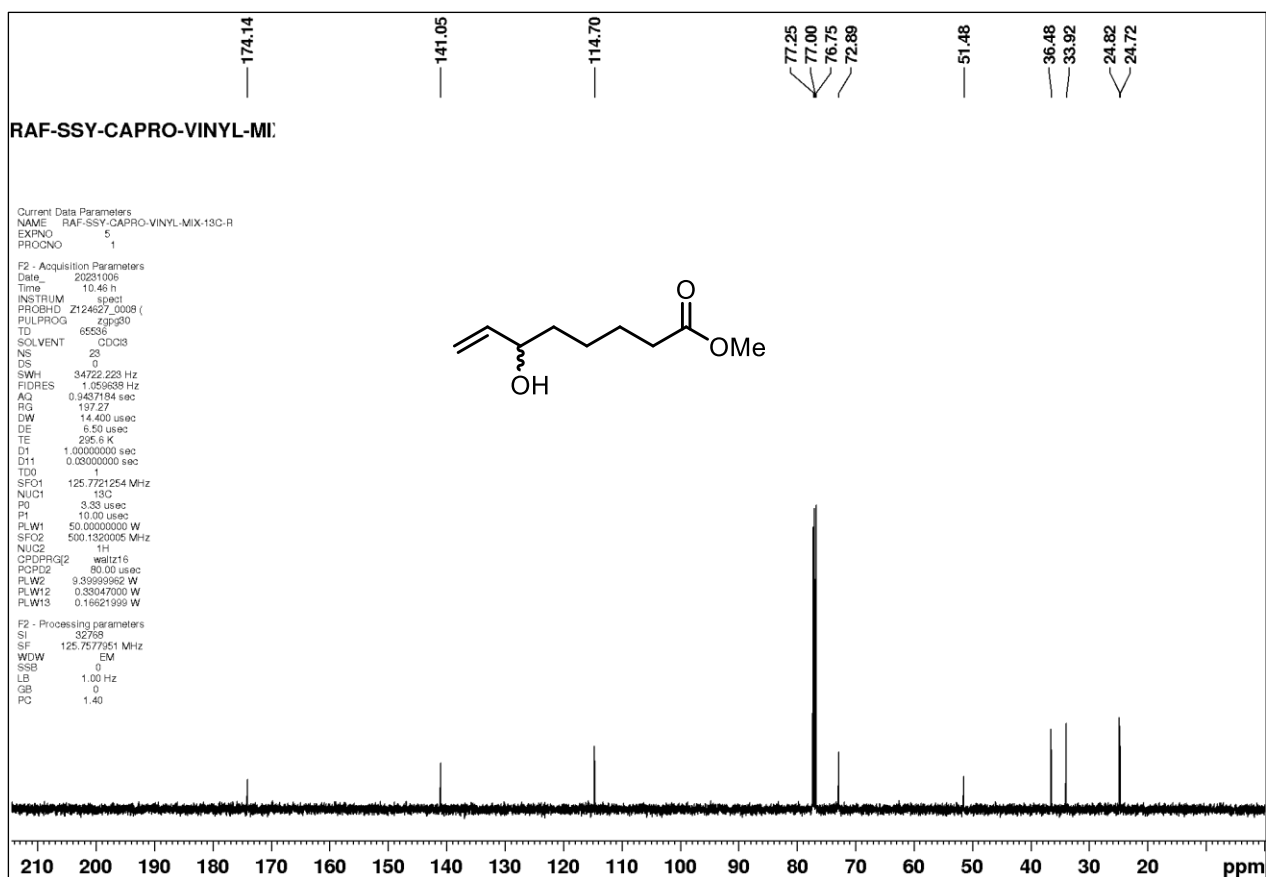

11: HRMS (ESI-TOF)  $m/z$ :  $[M + Na]^+$  calcd for  $C_9H_{16}O_3Na$  195.0992; Found 195.1001

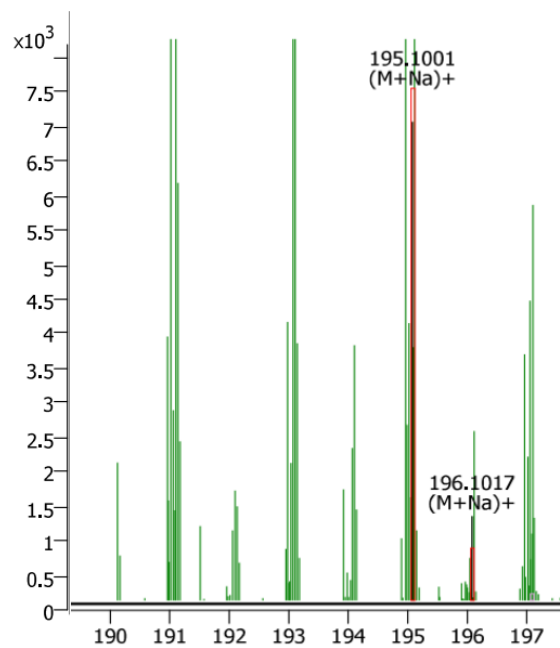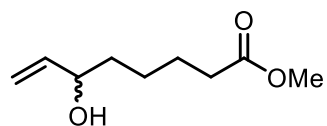

<sup>1</sup>H NMR (500 MHz, CDCl<sub>3</sub>) and <sup>13</sup>C{<sup>1</sup>H} NMR (125 MHz, CDCl<sub>3</sub>) of compound 4

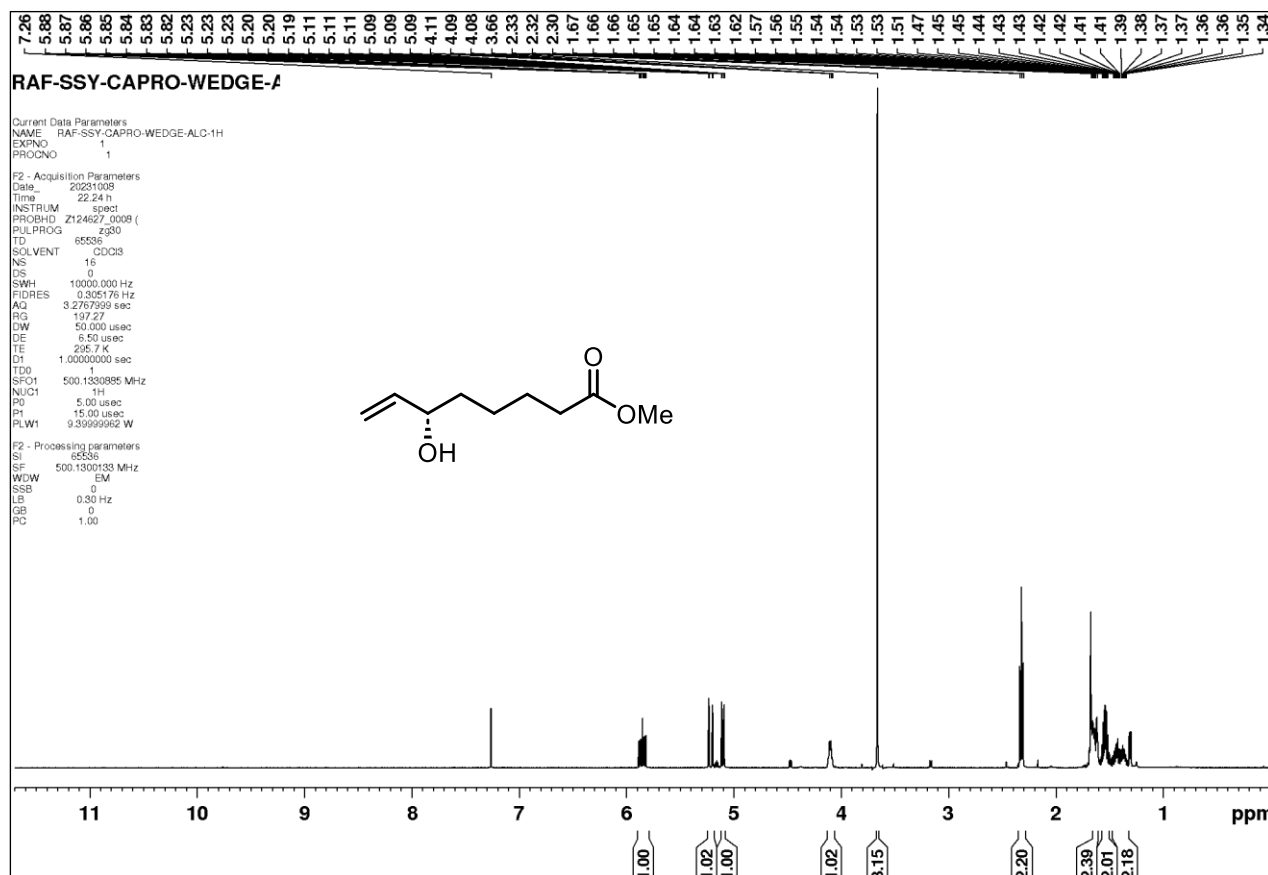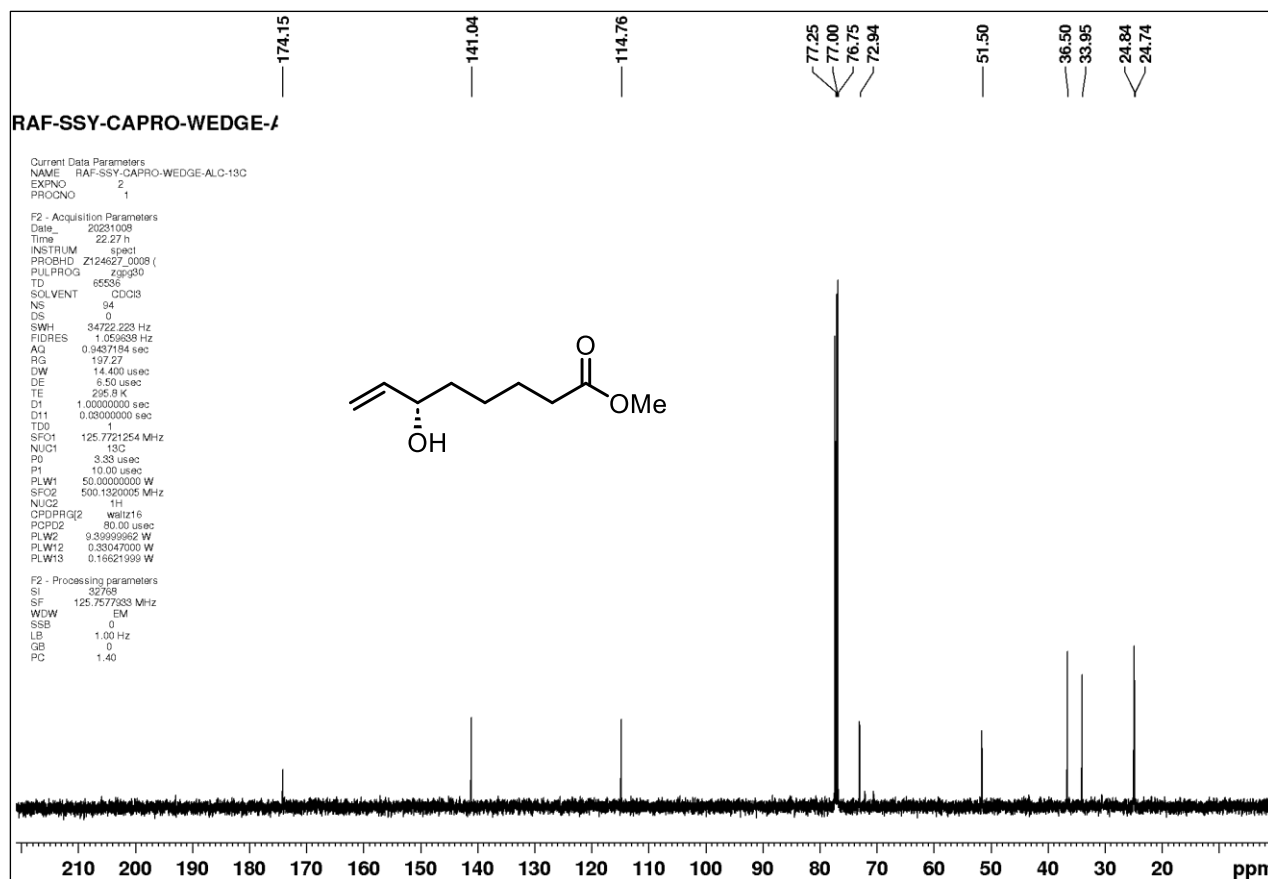

4: HRMS (ESI-TOF)  $m/z$ :  $[M + H]^+$  calcd for  $C_9H_{17}O_3$  173.1173; Found 173.1166

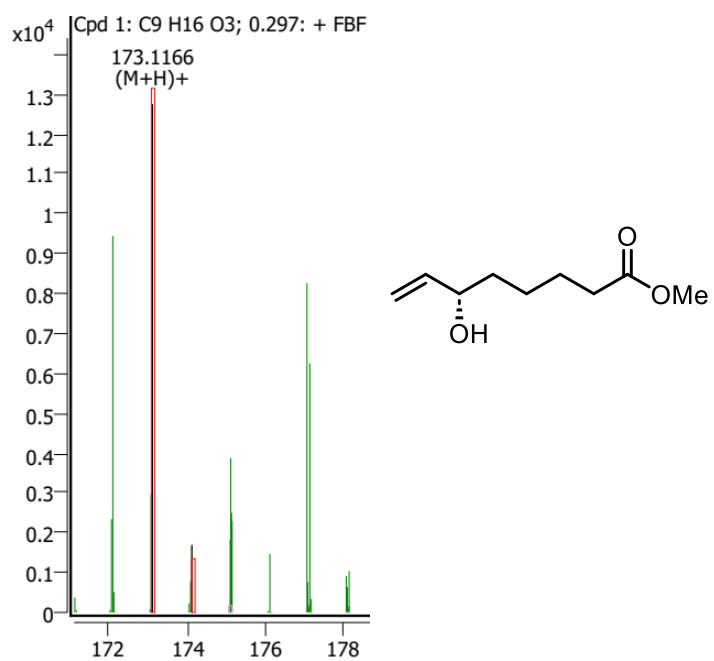

$^1\text{H}$  NMR (500 MHz,  $\text{CDCl}_3$ ) and  $^{13}\text{C}\{^1\text{H}\}$  NMR (125 MHz,  $\text{CDCl}_3$ ) of compound 4'

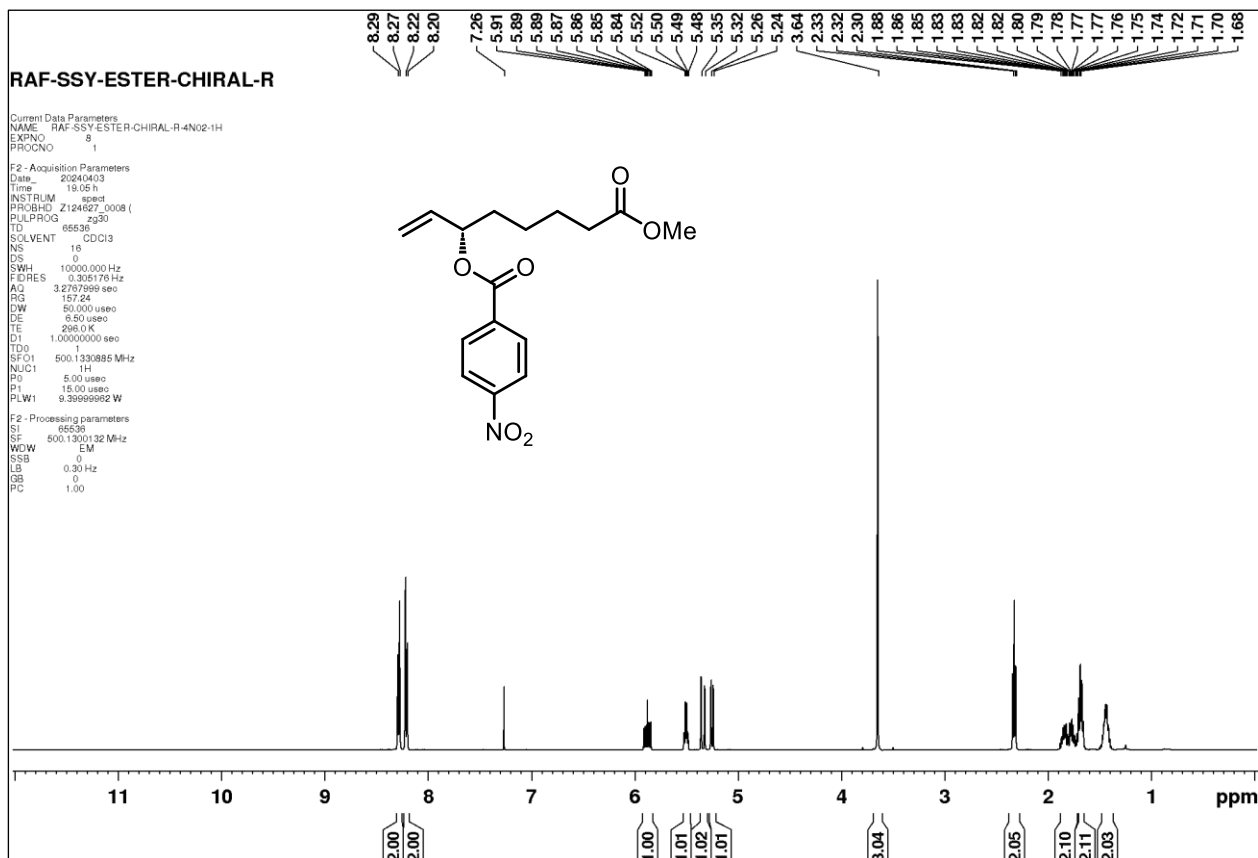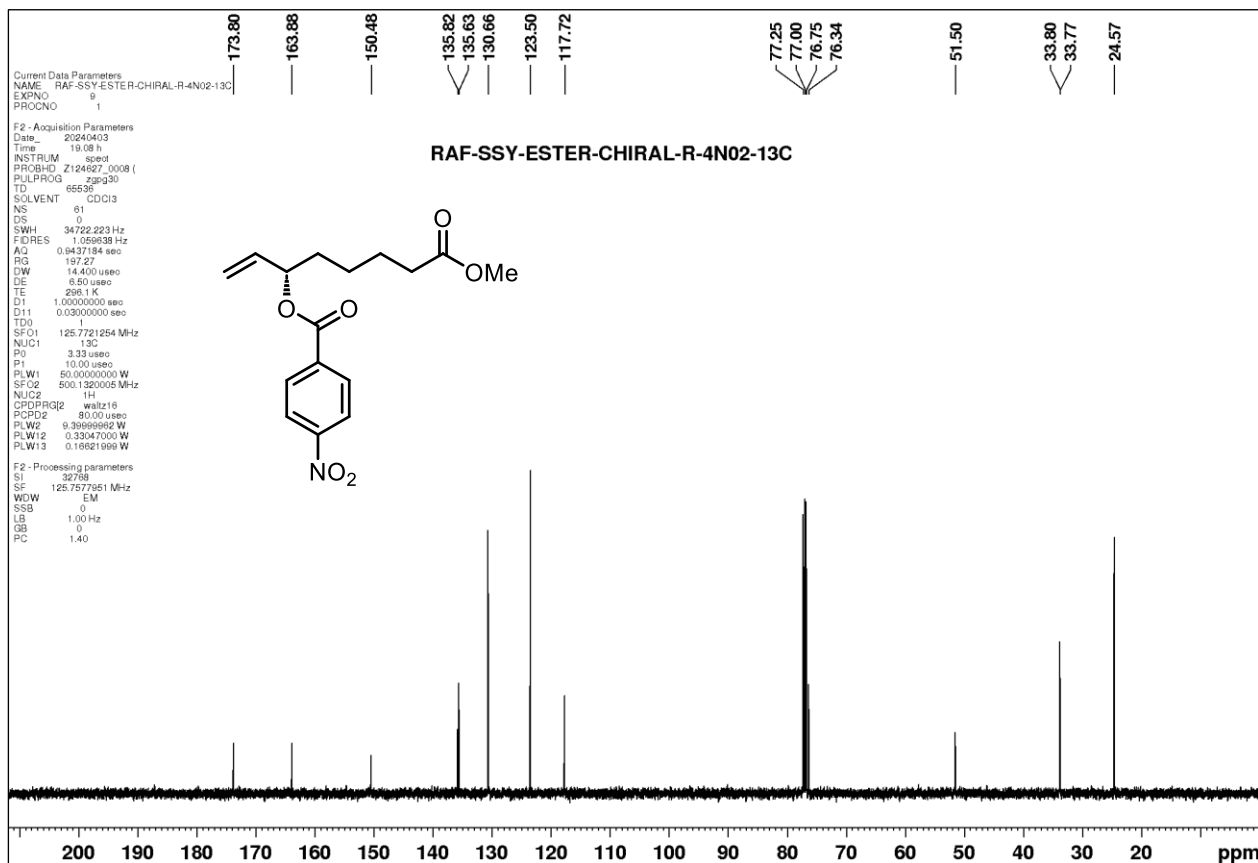



**4'**: HRMS (ESI-TOF)  $m/z$ :  $[M + Na]^+$  calcd for  $C_{16}H_{19}NO_6Na$  344.1105; Found 344.1110.

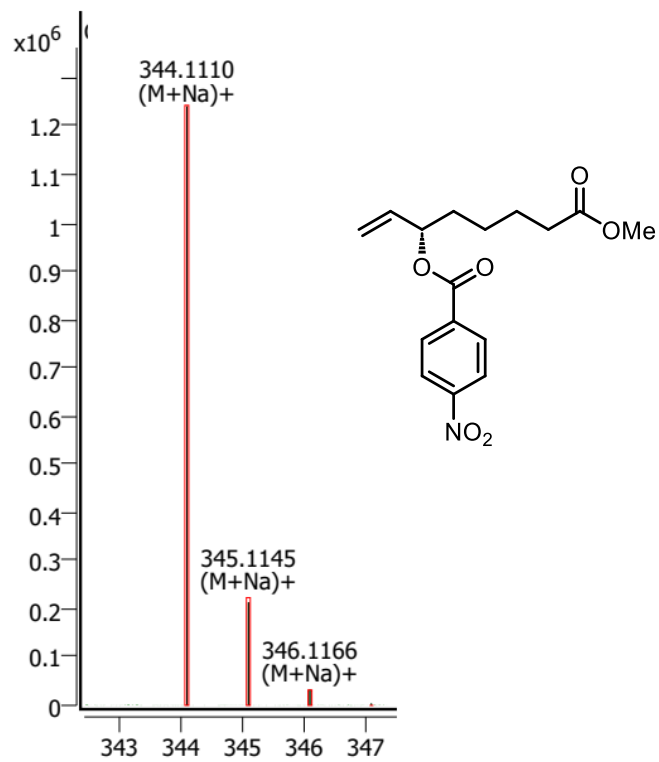

HPLC chromatograms of racemic and chiral 4' (94% ee)

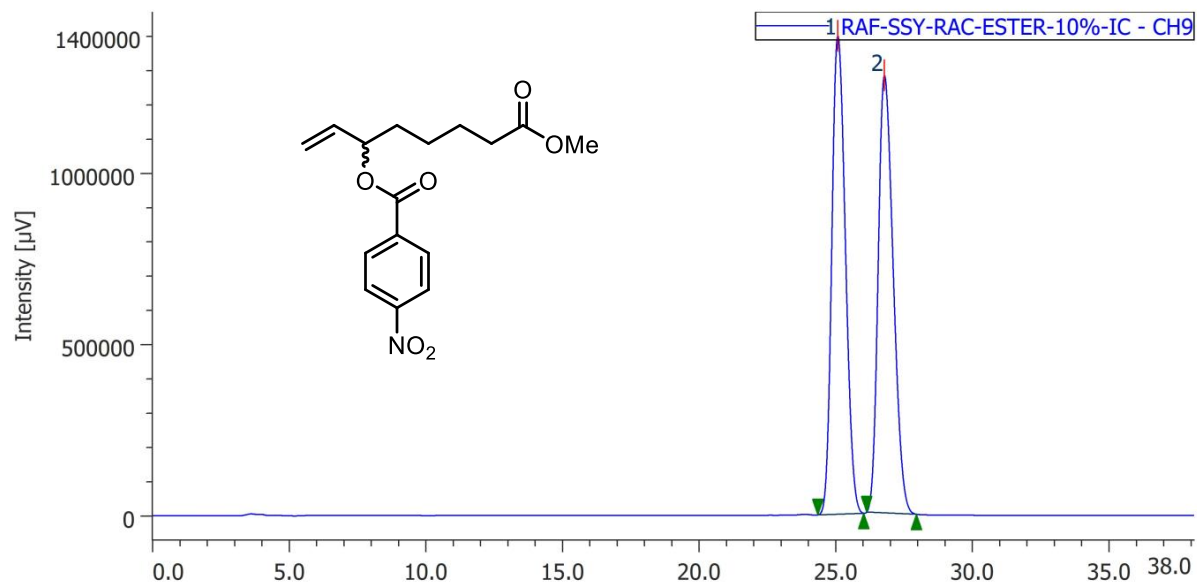

| #     | Peak Name | CH | tR [min] | Area [µV·sec] | Height [µV] | Area%  | Height% | Quantity | NTP   | Resolution | Symmetry Factor | Warning |
|-------|-----------|----|----------|---------------|-------------|--------|---------|----------|-------|------------|-----------------|---------|
| 1     | Unknown   | 9  | 25.067   | 48352659      | 1395861     | 49.757 | 52.240  | N/A      | 11697 | 1.756      | 1.183           |         |
| 2     | Unknown   | 9  | 26.773   | 48824788      | 1276138     | 50.243 | 47.760  | N/A      | 10978 | N/A        | 1.273           |         |
| Total |           |    |          | 97177447      | 2671999     |        |         | 0.00000  |       |            |                 |         |

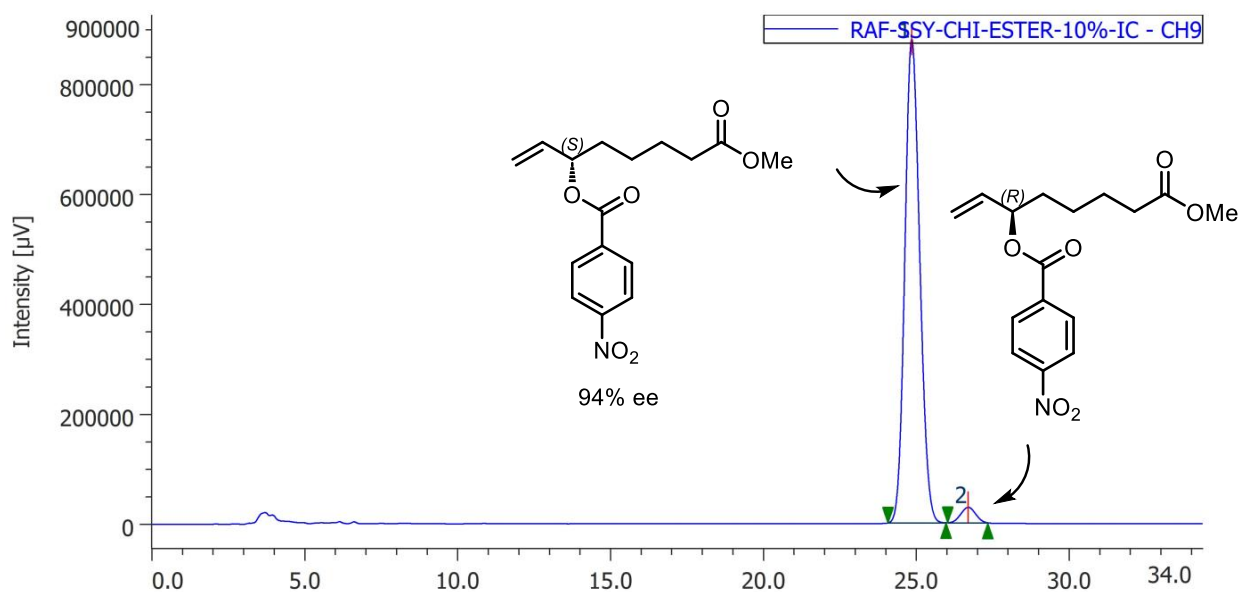

| #     | Peak Name | CH | tR [min] | Area [µV·sec] | Height [µV] | Area%  | Height% | Quantity | NTP   | Resolution | Symmetry Factor | Warning |
|-------|-----------|----|----------|---------------|-------------|--------|---------|----------|-------|------------|-----------------|---------|
| 1     | Unknown   | 9  | 24.840   | 29863019      | 880024      | 96.870 | 96.886  | N/A      | 12212 | 2.030      | 1.126           |         |
| 2     | Unknown   | 9  | 26.683   | 964952        | 28281       | 3.130  | 3.114   | N/A      | 13398 | N/A        | 1.010           |         |
| Total |           |    |          | 30827971      | 908305      |        |         | 0.00000  |       |            |                 |         |

$^1\text{H}$  NMR (500 MHz,  $\text{CDCl}_3$ ) and  $^{13}\text{C}\{^1\text{H}\}$  NMR (125 MHz,  $\text{CDCl}_3$ ) of compound **12**

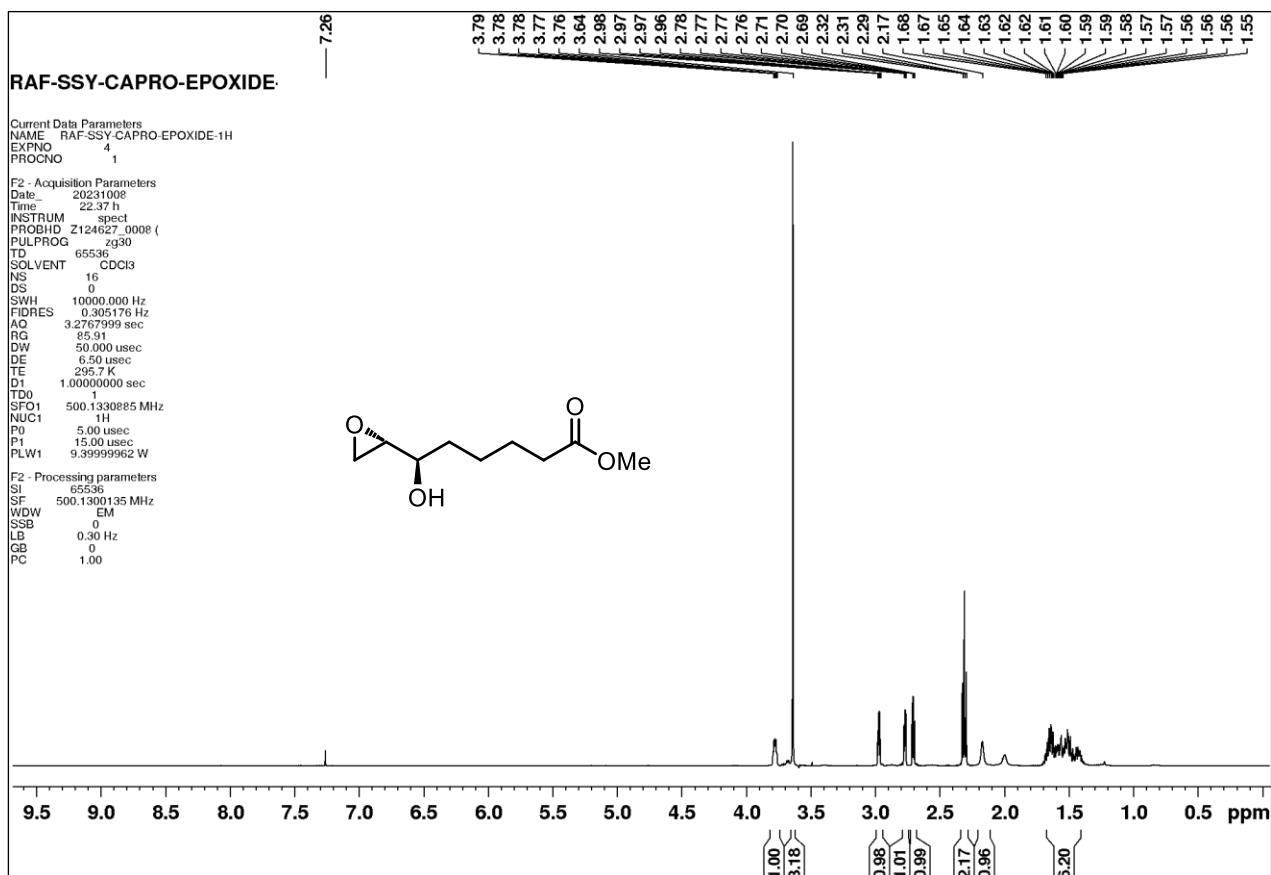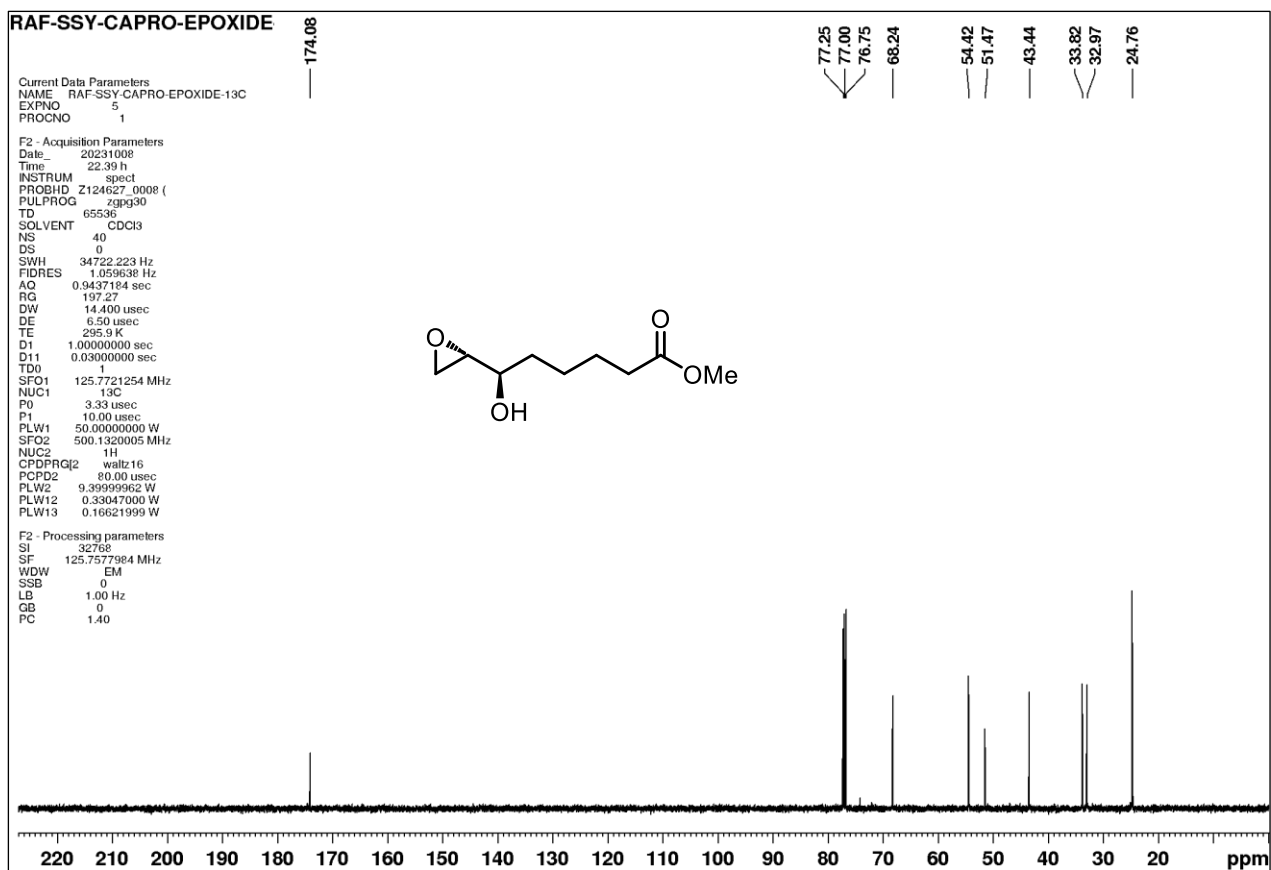

12: HRMS (ESI-TOF)  $m/z$ :  $[M + Na]^+$  calcd for  $C_9H_{16}O_4Na$  211.0941; Found 211.0935

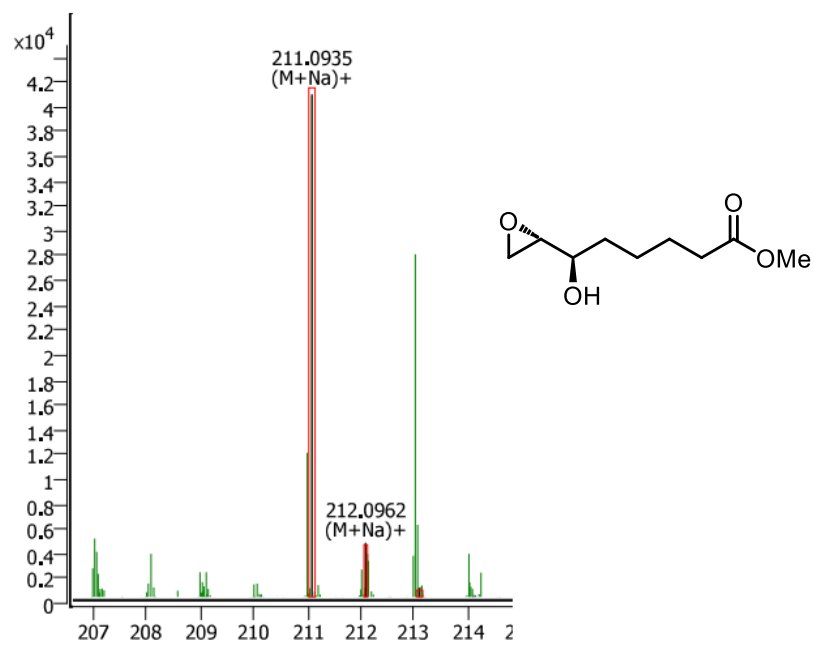

$^1\text{H}$  NMR (400 MHz,  $\text{CD}_3\text{OD}$ ) and  $^{13}\text{C}\{^1\text{H}\}$  NMR (100 MHz,  $\text{CD}_3\text{OD}$ ) of compound **1a**

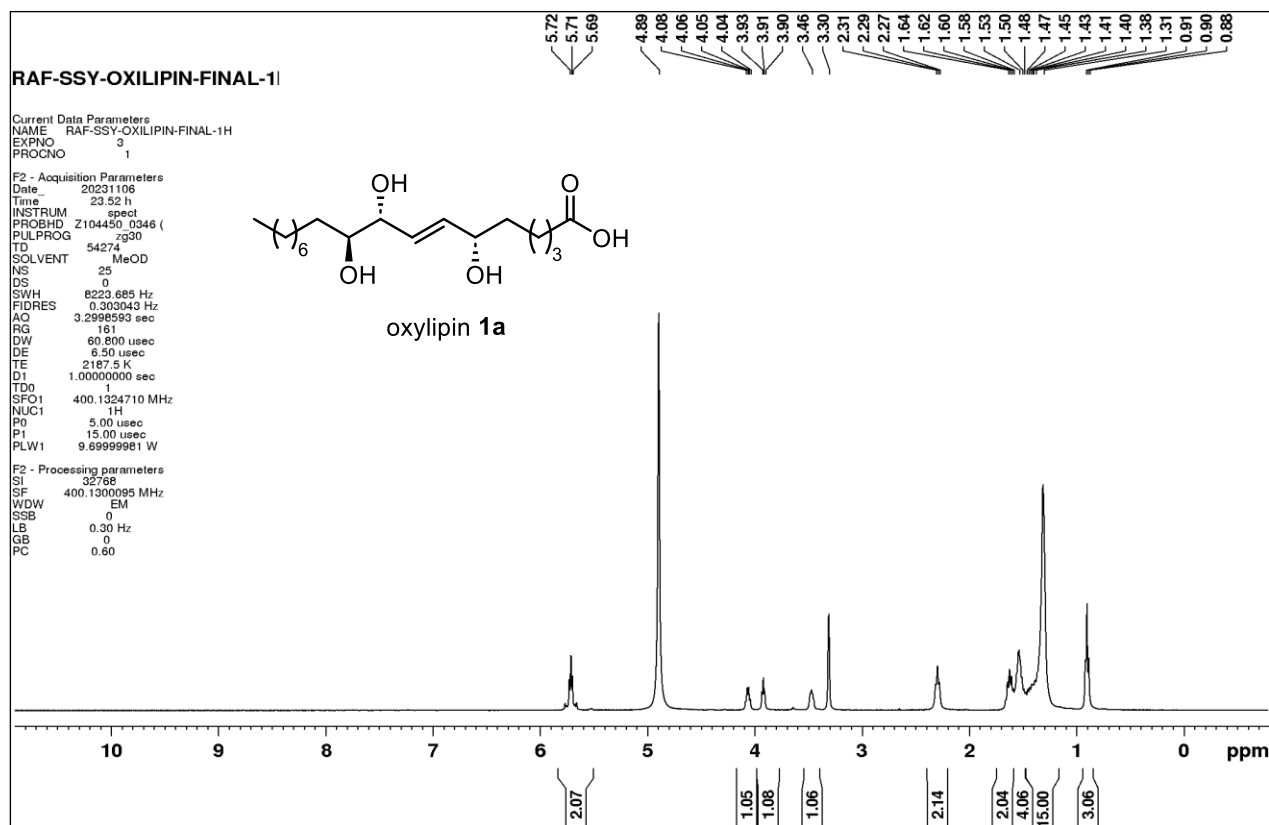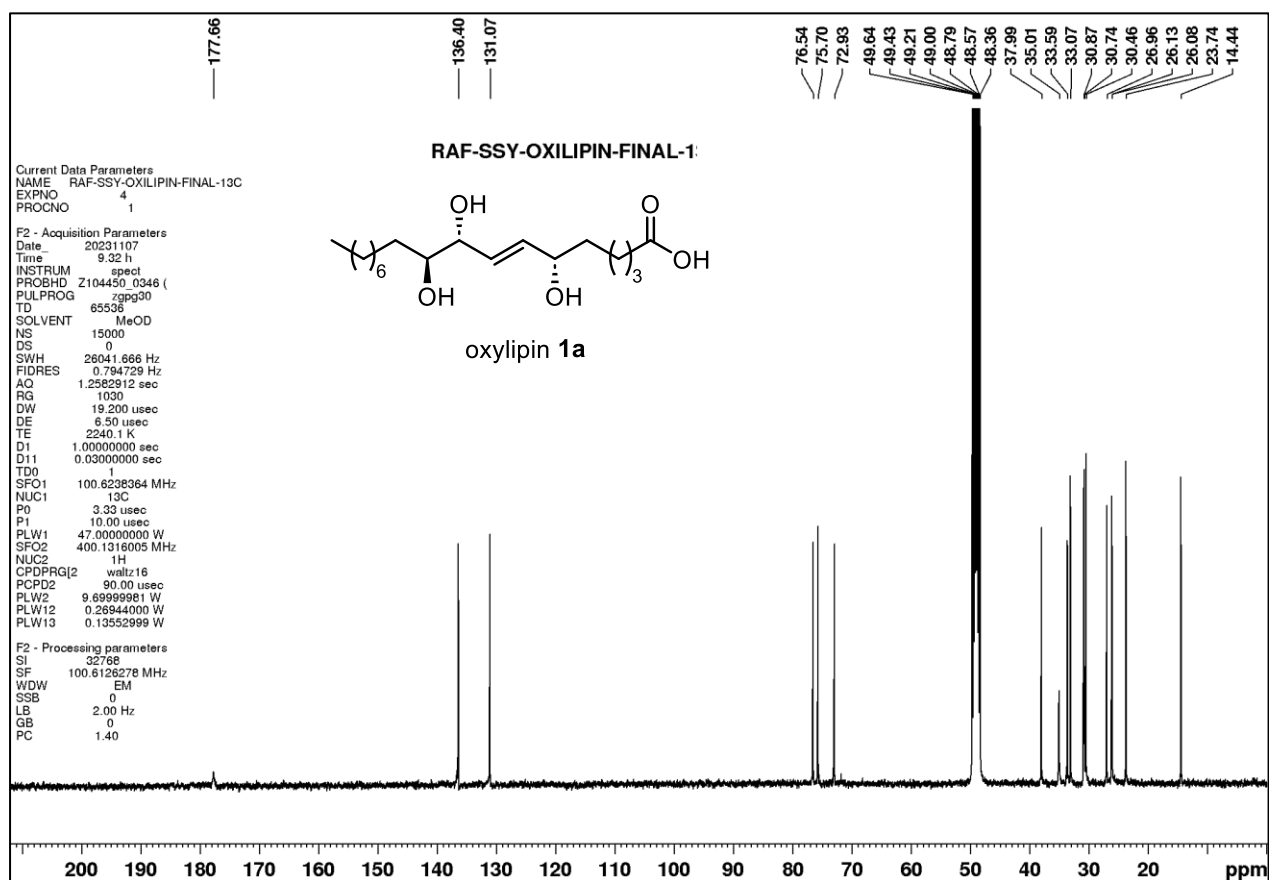

**1a:** HRMS (ESI-TOF)  $m/z$ :  $[M + Na]^+$  calcd for  $C_{18}H_{34}O_5Na$  353.2298; Found 353.2297

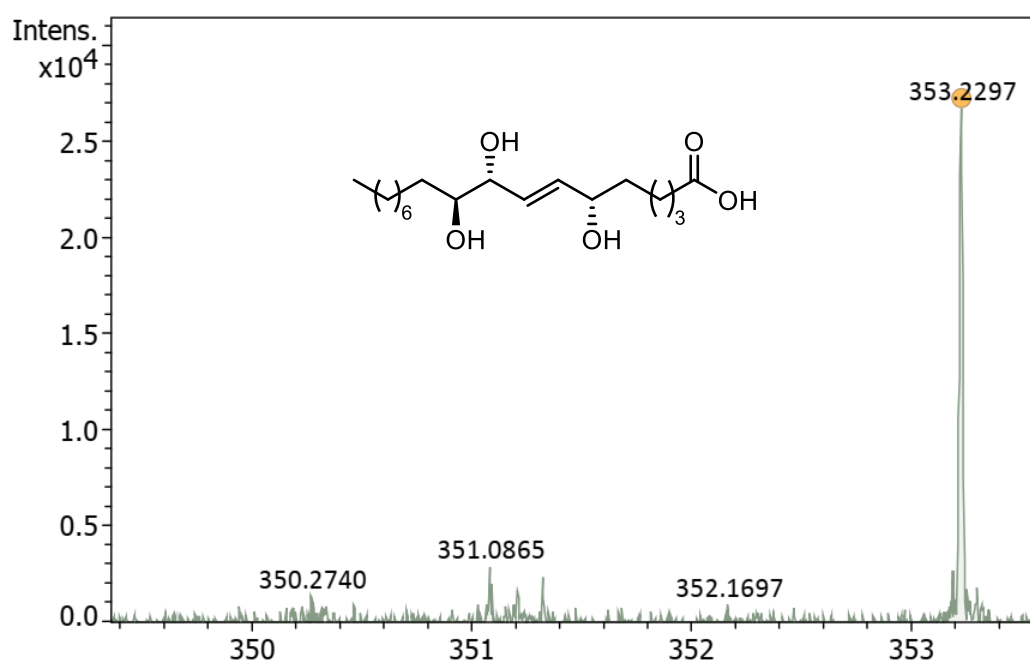

# COSY and HSQC of Compound 1a

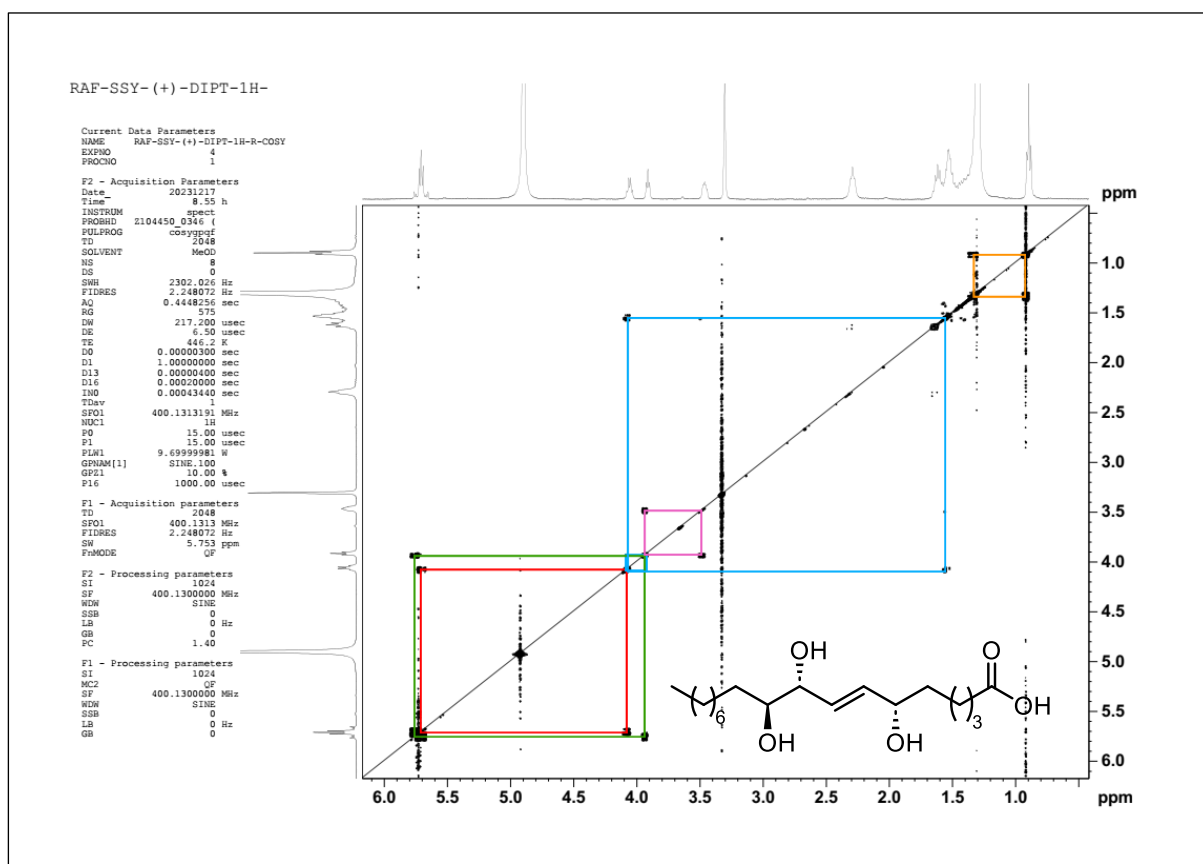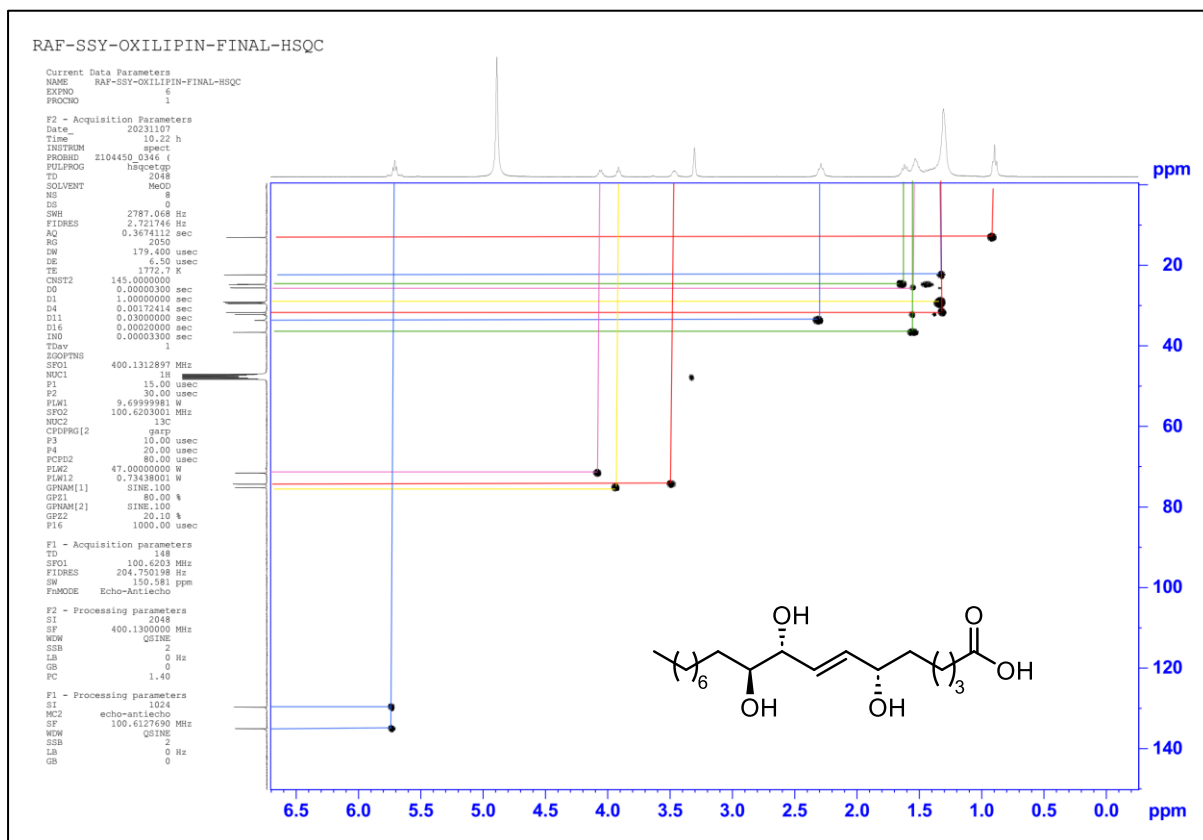

$^1\text{H}$  NMR (400 MHz,  $\text{CDCl}_3$ ) and  $^{13}\text{C}\{^1\text{H}\}$  NMR (100 MHz,  $\text{CDCl}_3$ ) of compound *ent-4*

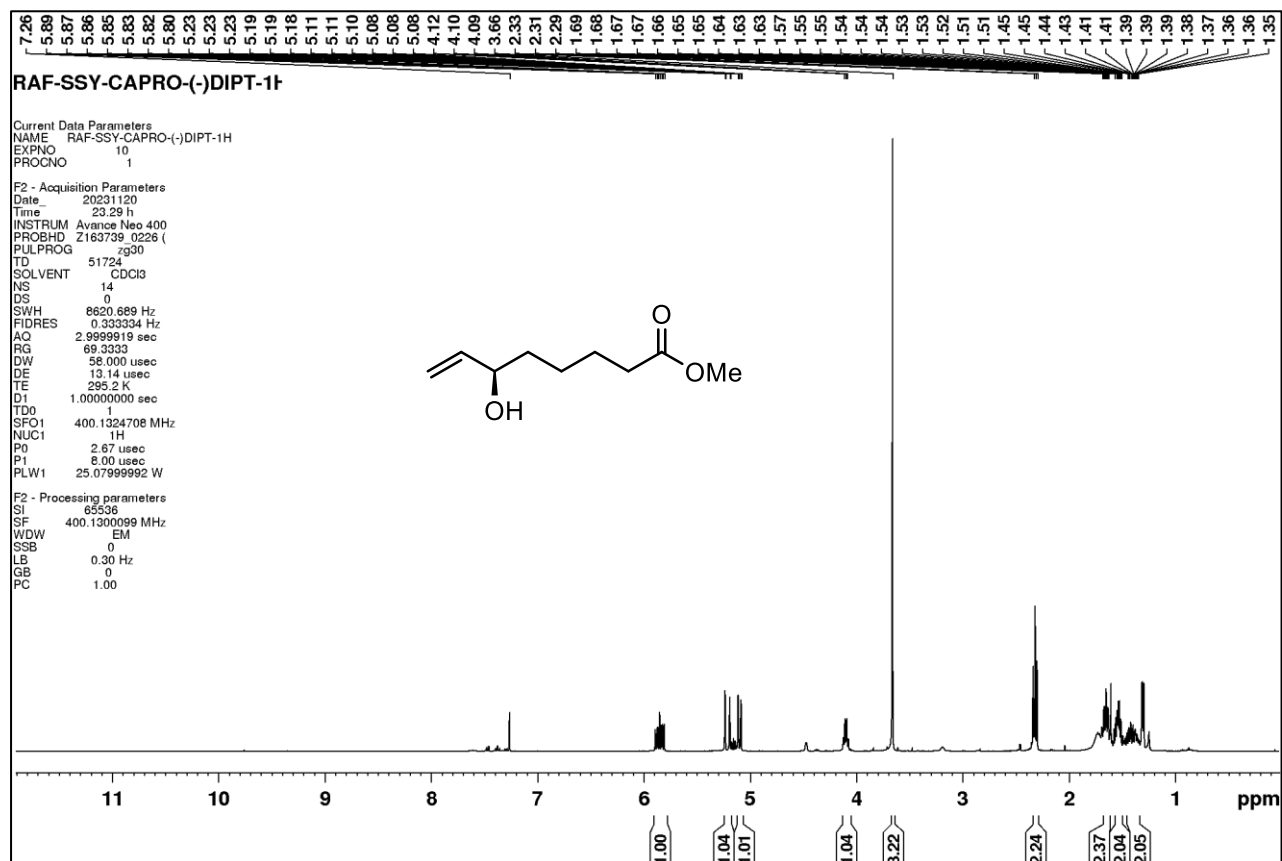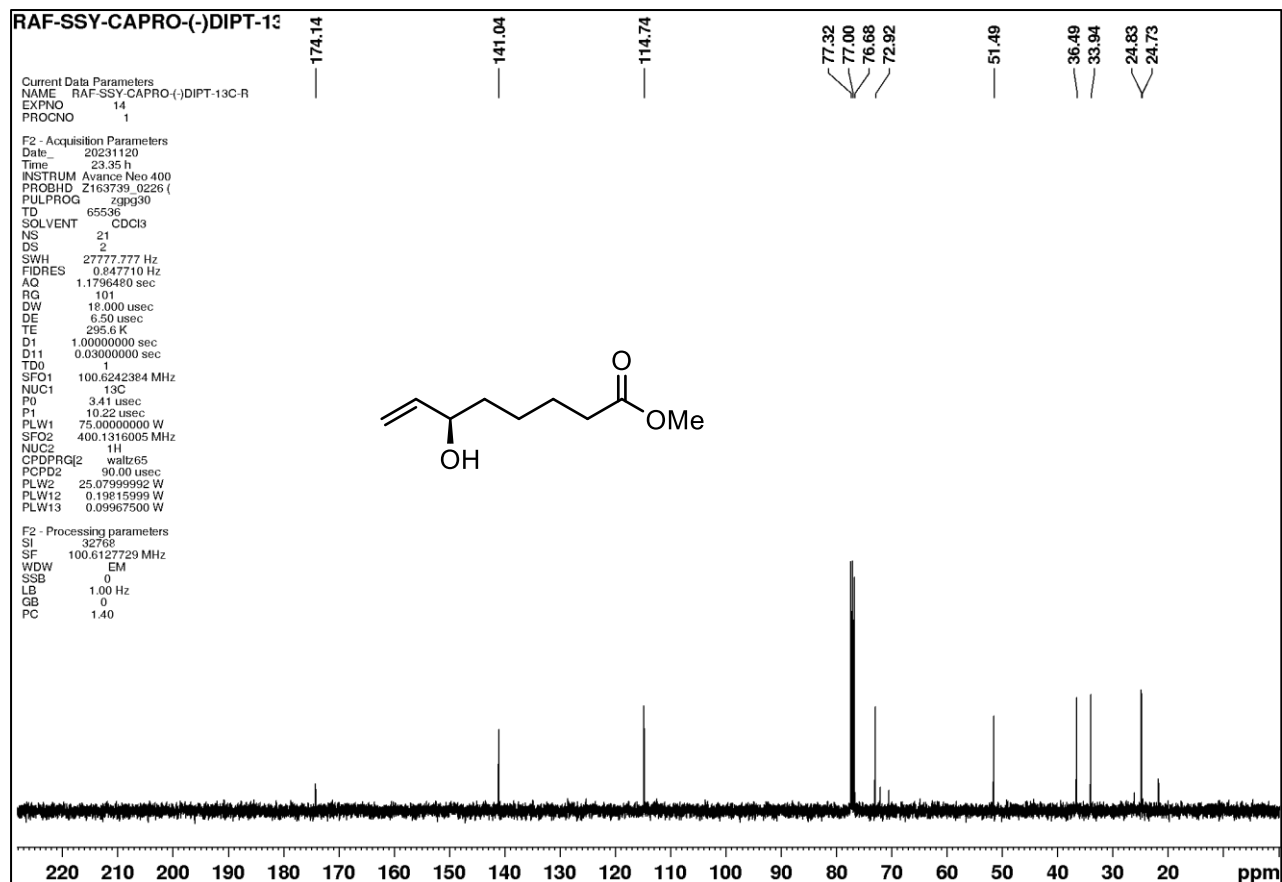



*ent*-4: HRMS (ESI-TOF)  $m/z$ :  $[M + Na]^+$  calcd for  $C_9H_{16}O_3Na$  195.0992; Found 195.0977

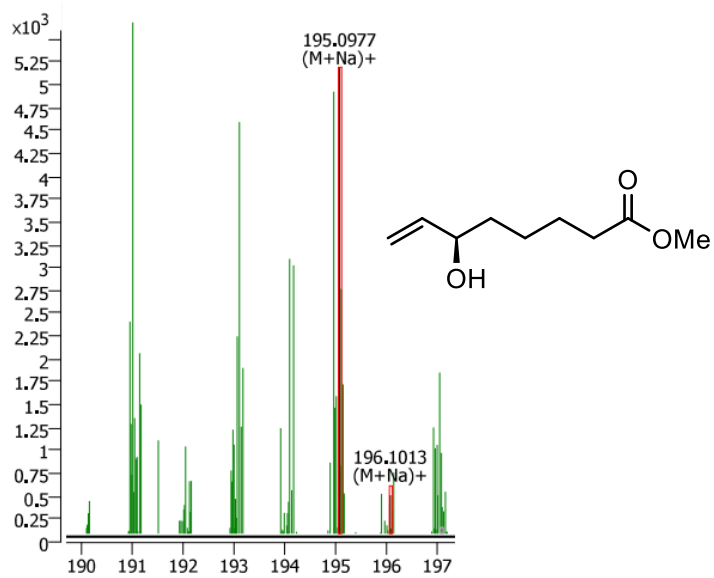

$^1\text{H}$  NMR (500 MHz,  $\text{CDCl}_3$ ) and  $^{13}\text{C}\{^1\text{H}\}$  NMR (100 MHz,  $\text{CDCl}_3$ ) of compound *ent-4'*

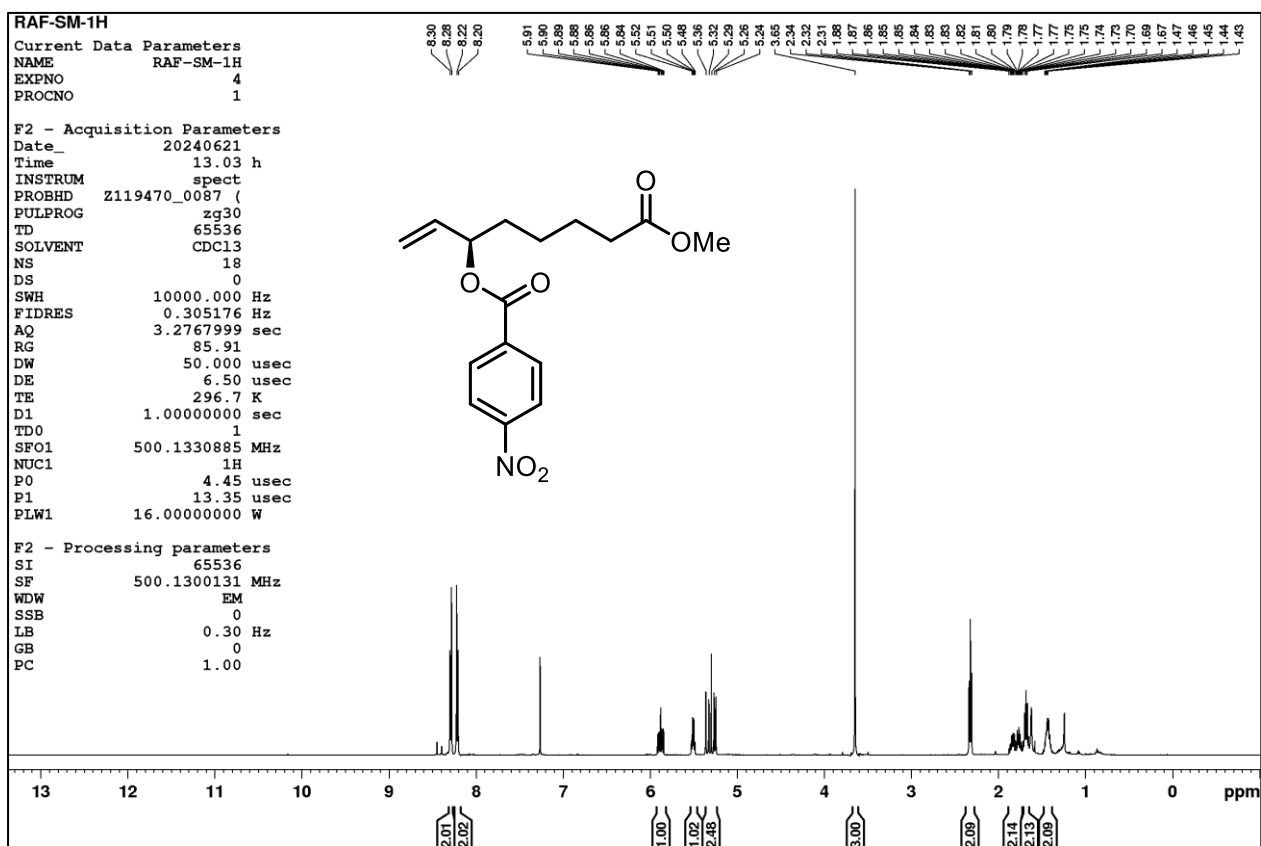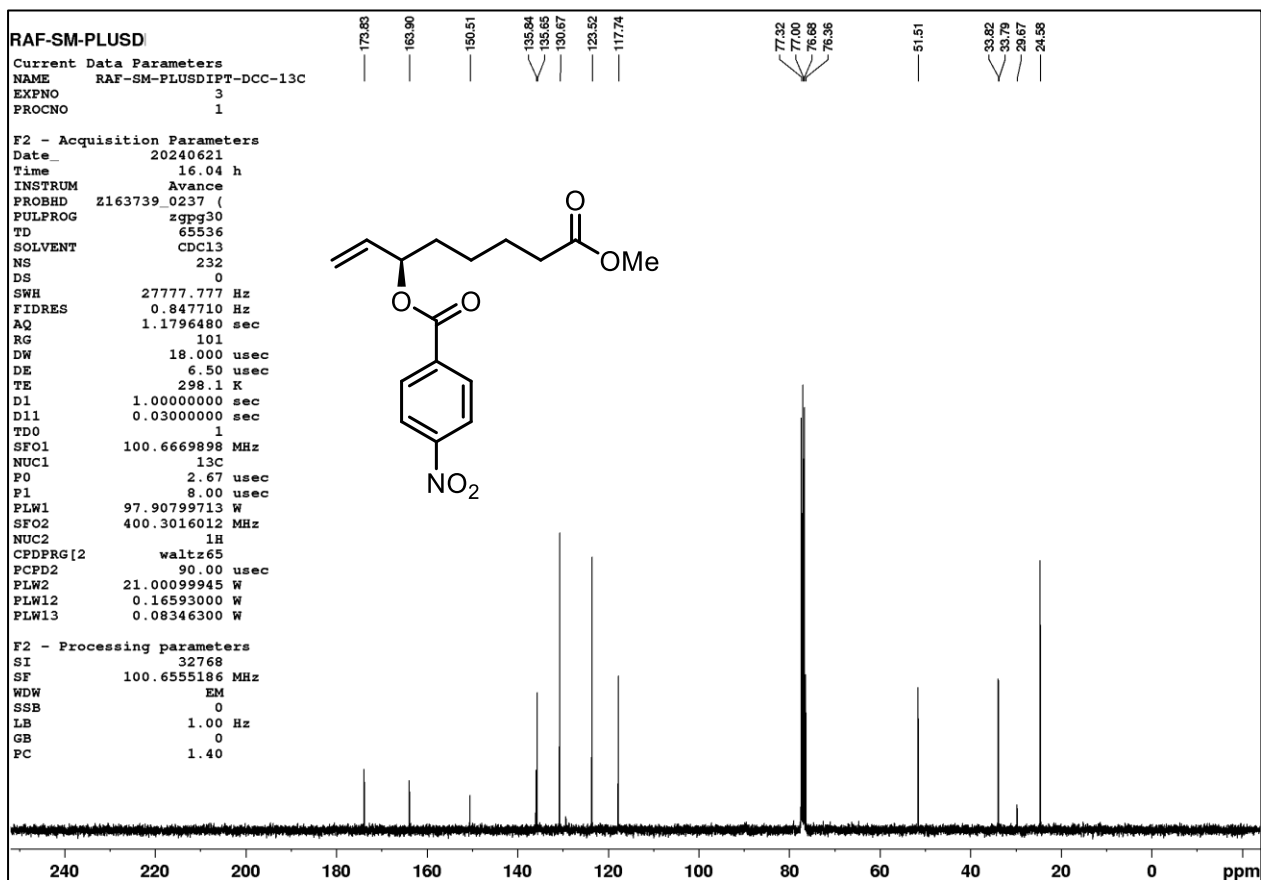

*ent*-4': HRMS (ESI-TOF)  $m/z$ :  $[M + Na]^+$  calcd for  $C_{16}H_{19}NO_6Na$  344.1105; Found 344.1105.

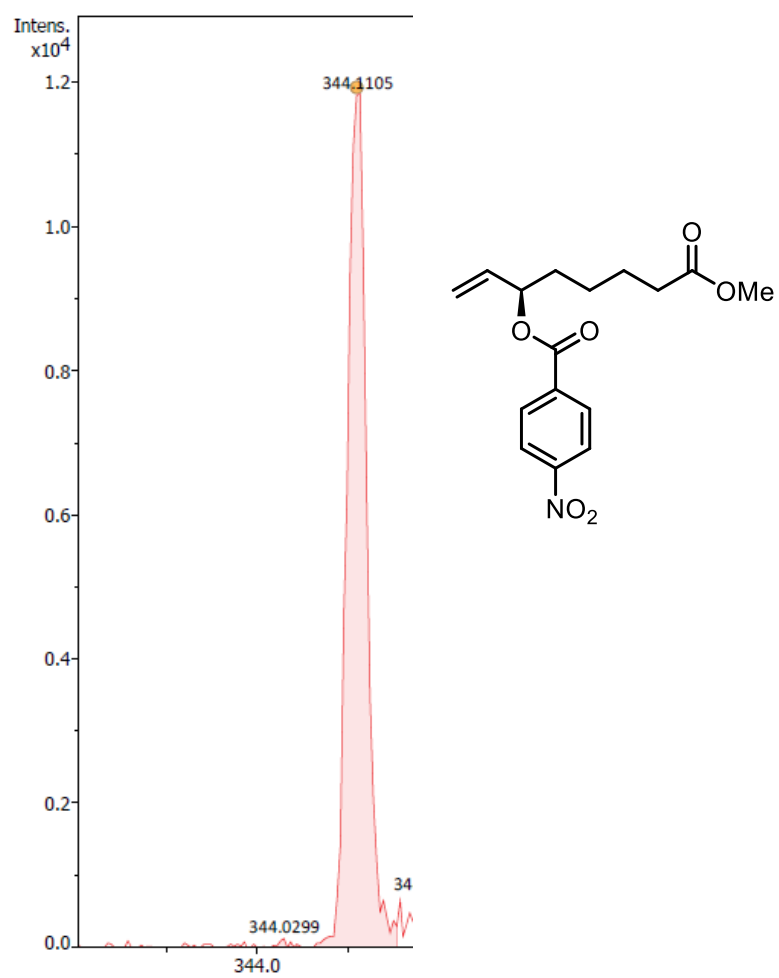

HPLC chromatograms of racemic and chiral *ent*-4' (98% *ee*)

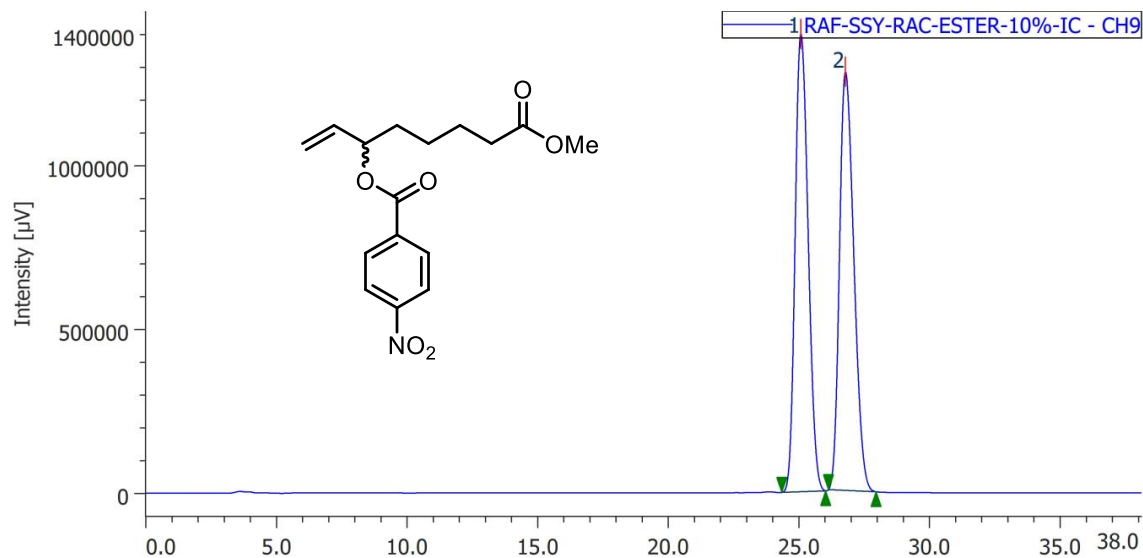

| #     | Peak Name | CH | tR [min] | Area [µV·sec] | Height [µV] | Area%  | Height% | Quantity | NTP   | Resolution | Symmetry Factor | Warning |
|-------|-----------|----|----------|---------------|-------------|--------|---------|----------|-------|------------|-----------------|---------|
| 1     | Unknown   | 9  | 25.067   | 48352659      | 1395861     | 49.757 | 52.240  | N/A      | 11697 | 1.756      | 1.183           |         |
| 2     | Unknown   | 9  | 26.773   | 48824788      | 1276138     | 50.243 | 47.760  | N/A      | 10978 | N/A        | 1.273           |         |
| Total |           |    |          | 97177447      | 2671999     |        |         | 0.00000  |       |            |                 |         |

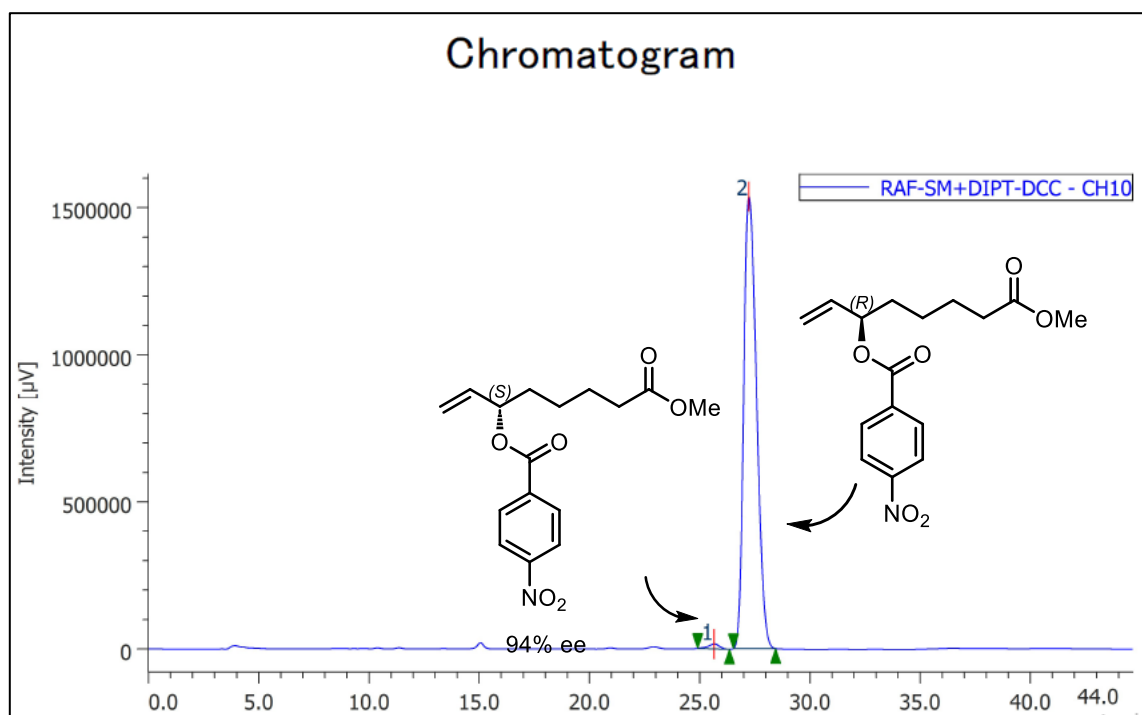

| #     | Peak Name | CH | tR [min] | Area [µV·sec] | Height [µV] | Area%  | Height% | Quantity | NTP   | Resolution | Symmetry Factor | Warning |
|-------|-----------|----|----------|---------------|-------------|--------|---------|----------|-------|------------|-----------------|---------|
| 1     | Unknown   | 10 | 25.643   | 589132        | 16427       | 0.943  | 1.059   | N/A      | 11981 | 1.572      | 0.882           |         |
| 2     | Unknown   | 10 | 27.227   | 61891887      | 1534747     | 99.057 | 98.941  | N/A      | 10112 | N/A        | 1.298           |         |
| Total |           |    |          | 62481019      | 1551174     |        |         | 0.00000  |       |            |                 |         |

$^1\text{H}$  NMR (400 MHz,  $\text{CDCl}_3$ ) and  $^{13}\text{C}\{^1\text{H}\}$  NMR (100 MHz,  $\text{CDCl}_3$ ) of compound *ent*-12

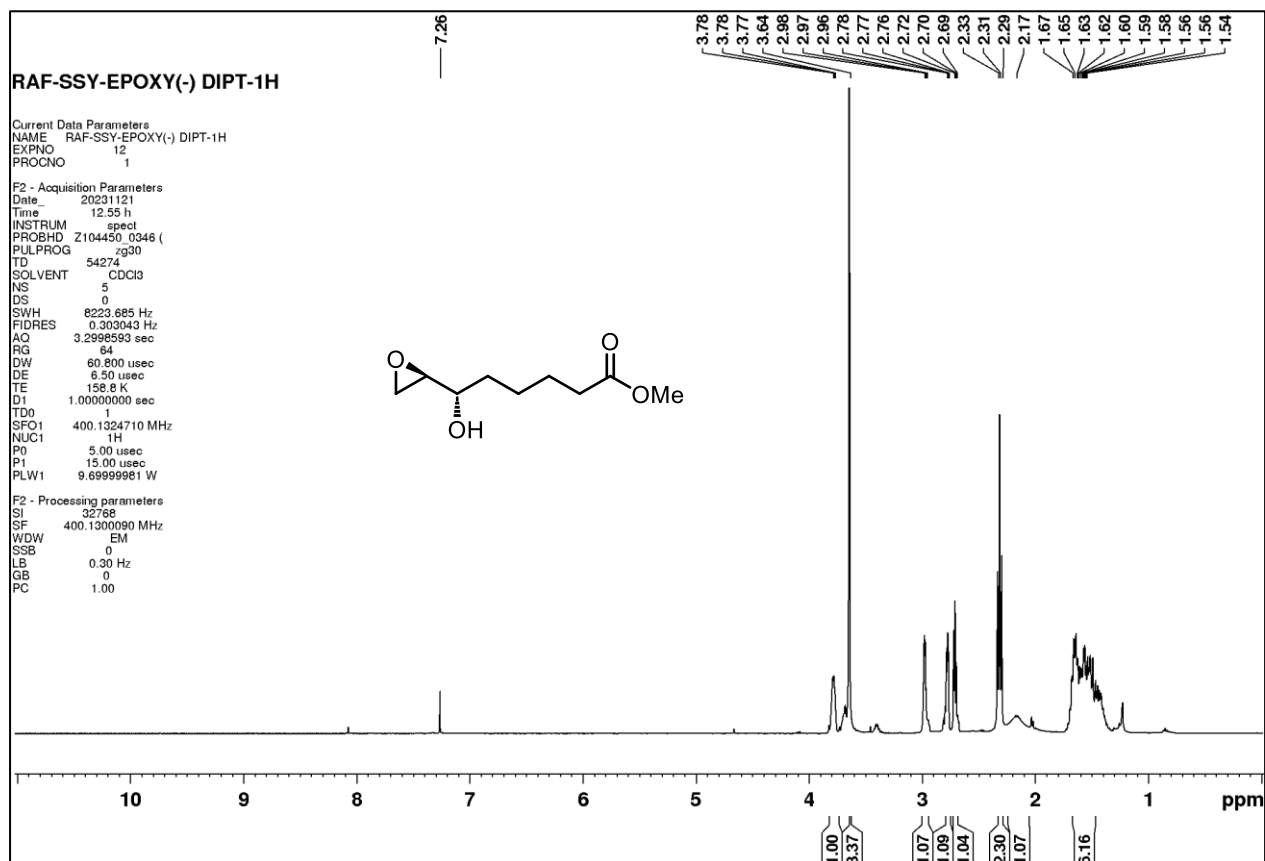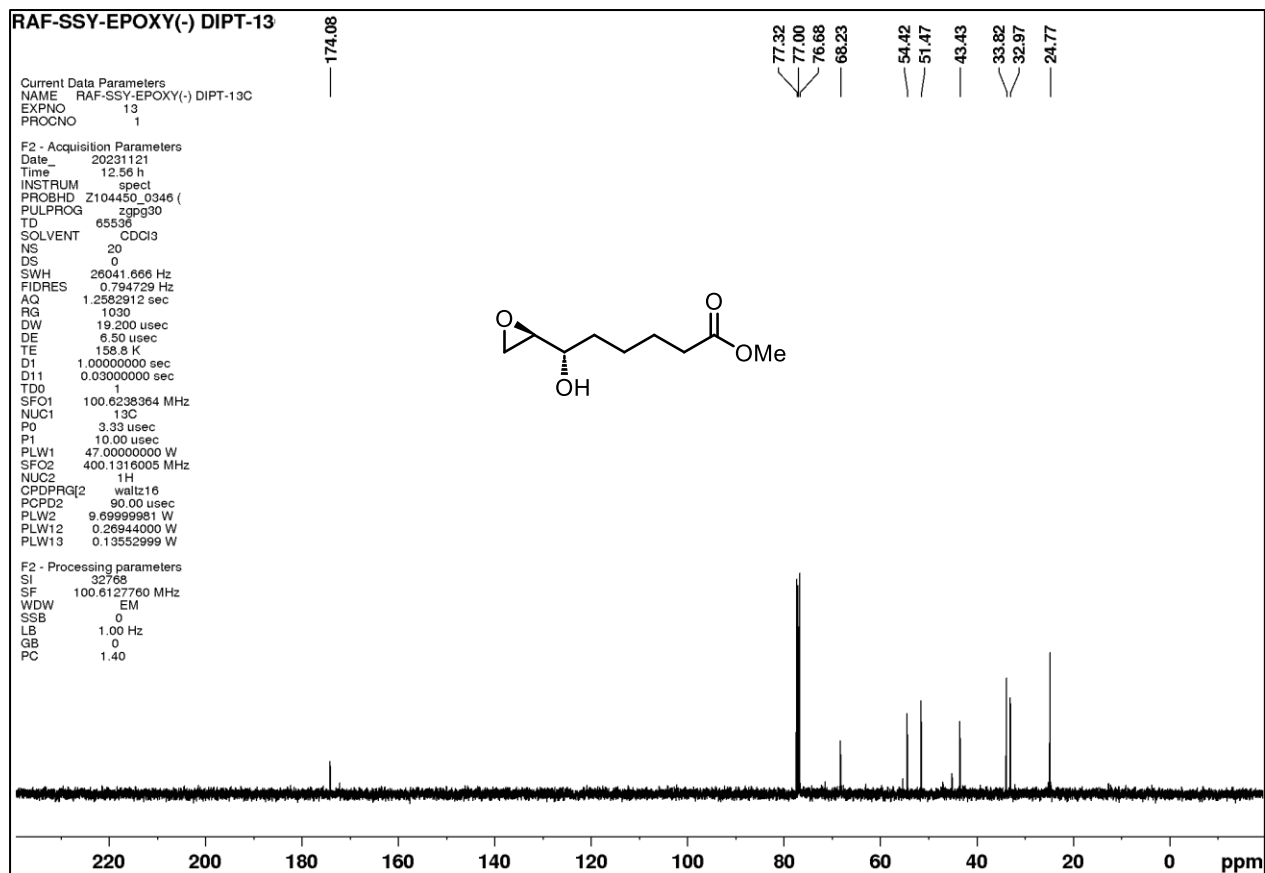

*ent*-**12**: HRMS (ESI-TOF)  $m/z$ :  $[M + Na]^+$  calcd for  $C_9H_{16}O_4Na$  211.0941; Found 211.0932

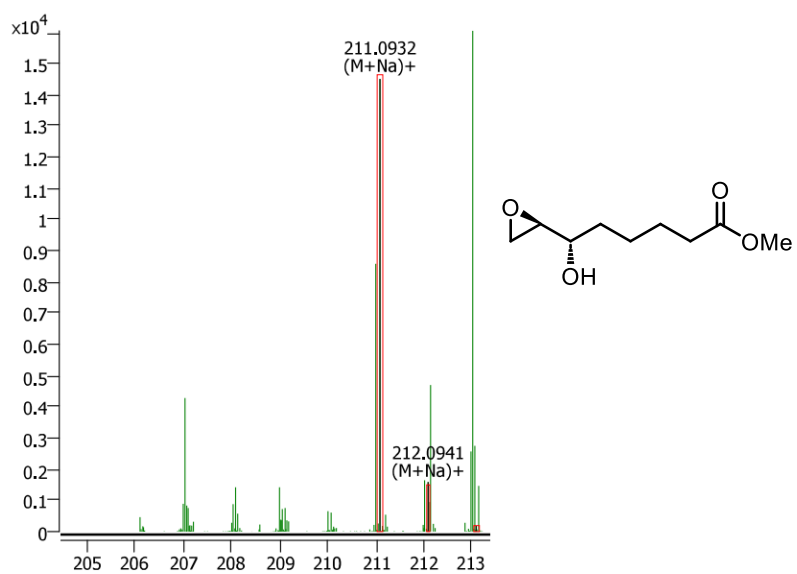

$^1\text{H}$  NMR (400 MHz,  $\text{CD}_3\text{OD}$ ) and  $^{13}\text{C}\{^1\text{H}\}$  NMR (100 MHz,  $\text{CD}_3\text{OD}$ ) of compound **1b**

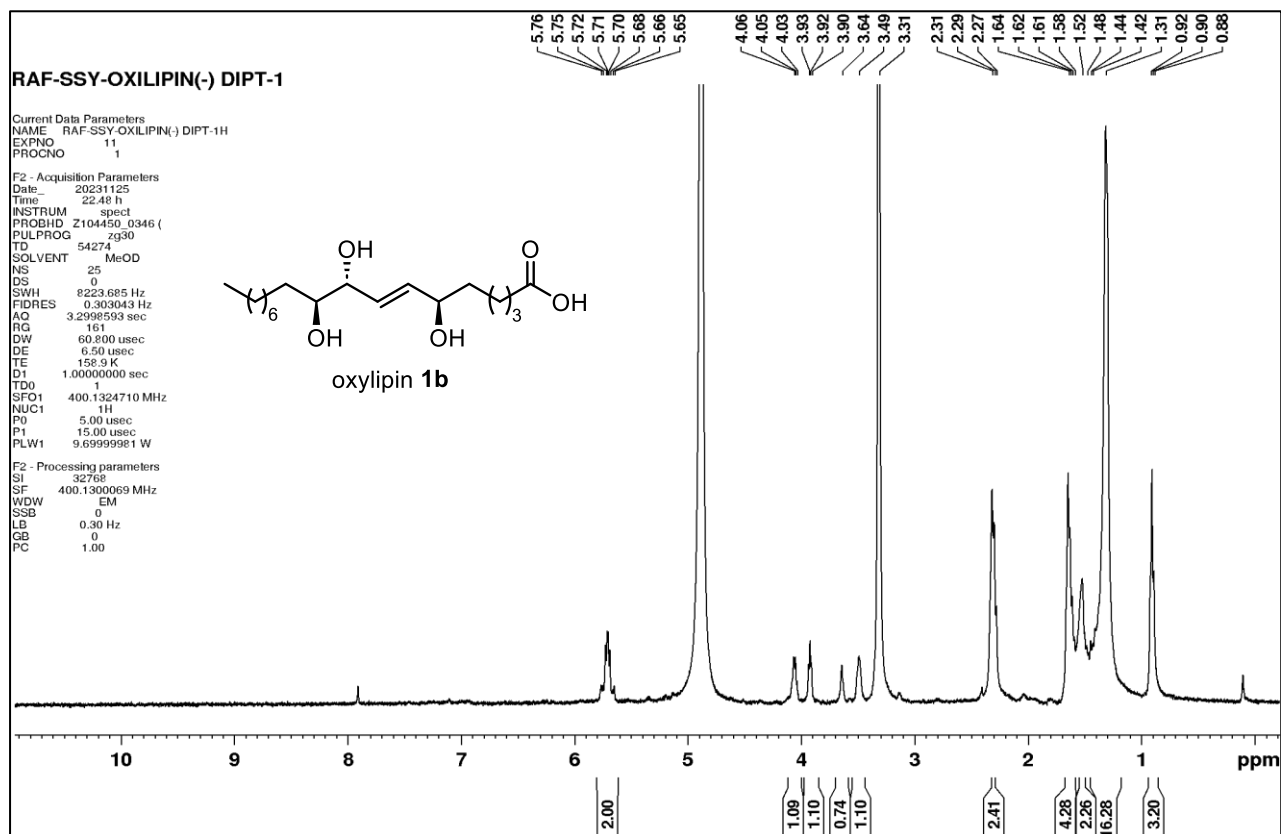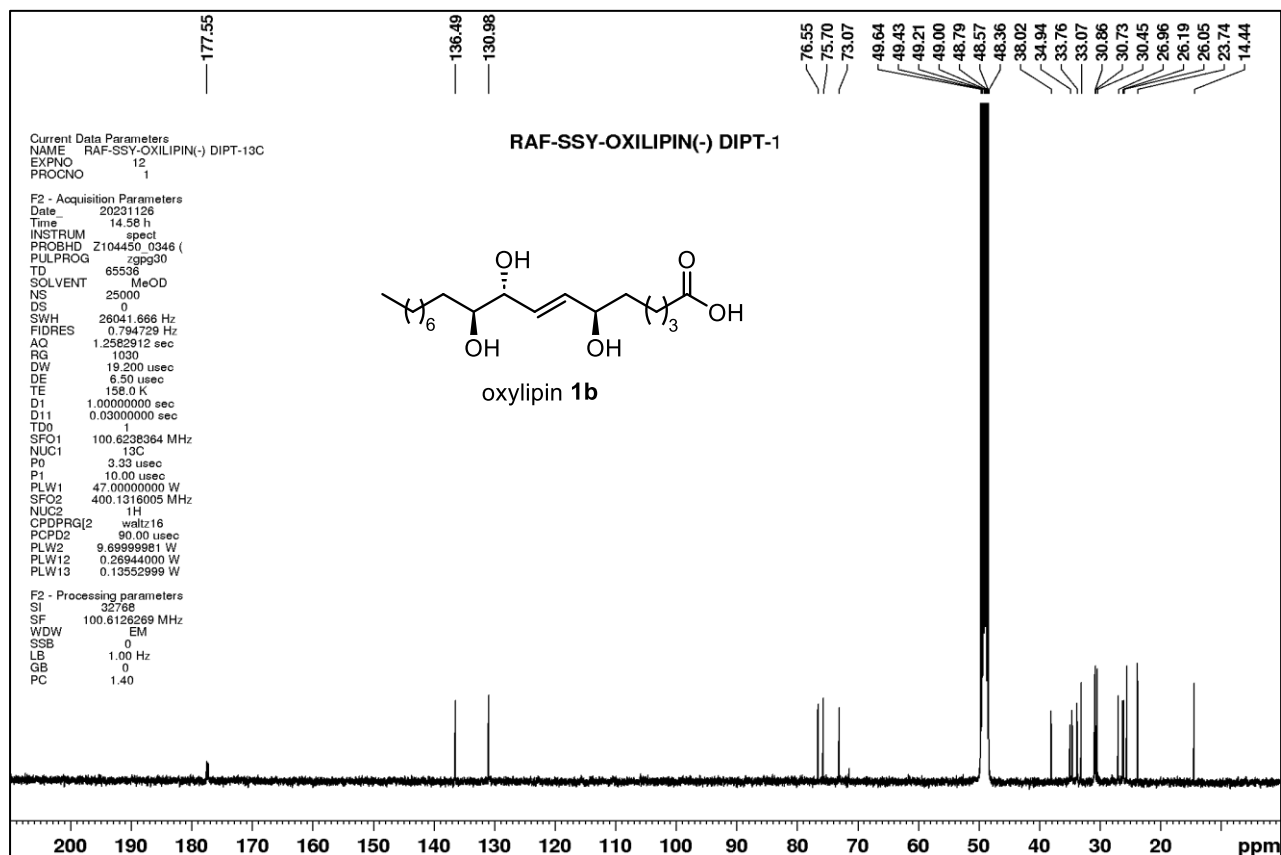

**1b:** HRMS (ESI-TOF)  $m/z$ :  $[M + Na]^+$  calcd for  $C_{18}H_{34}O_5Na$  353.2298; Found 353.2301

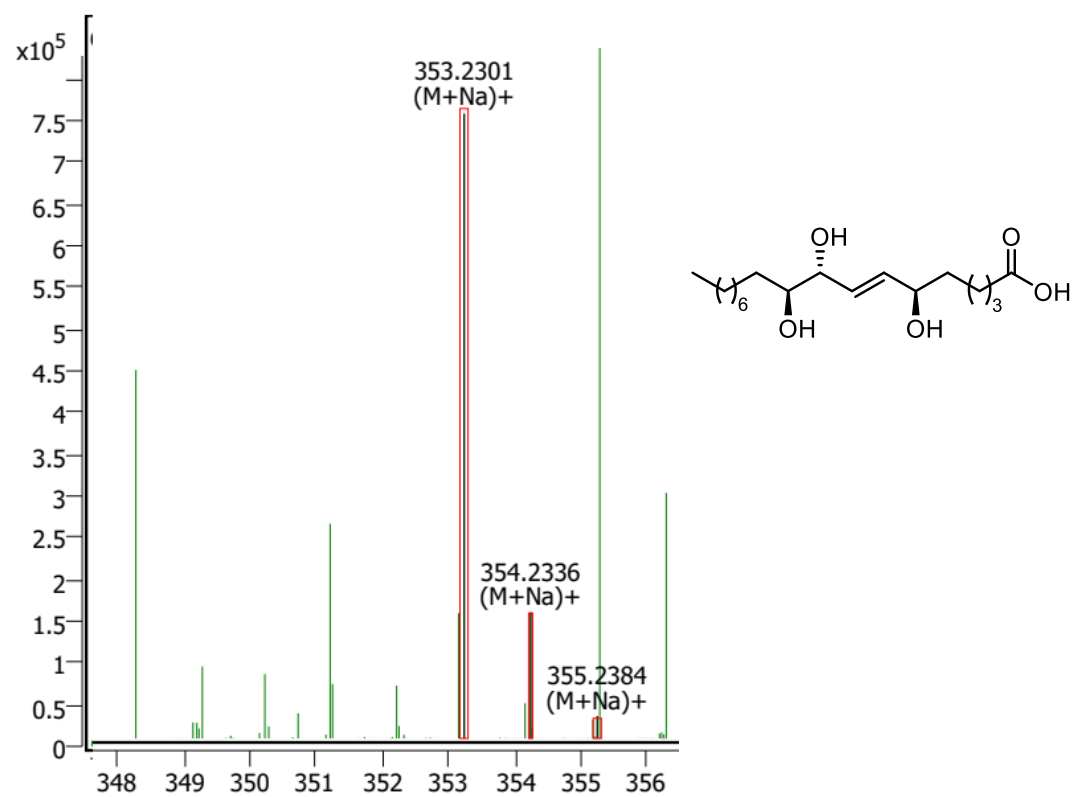



# COSY and HSQC of compound 1b

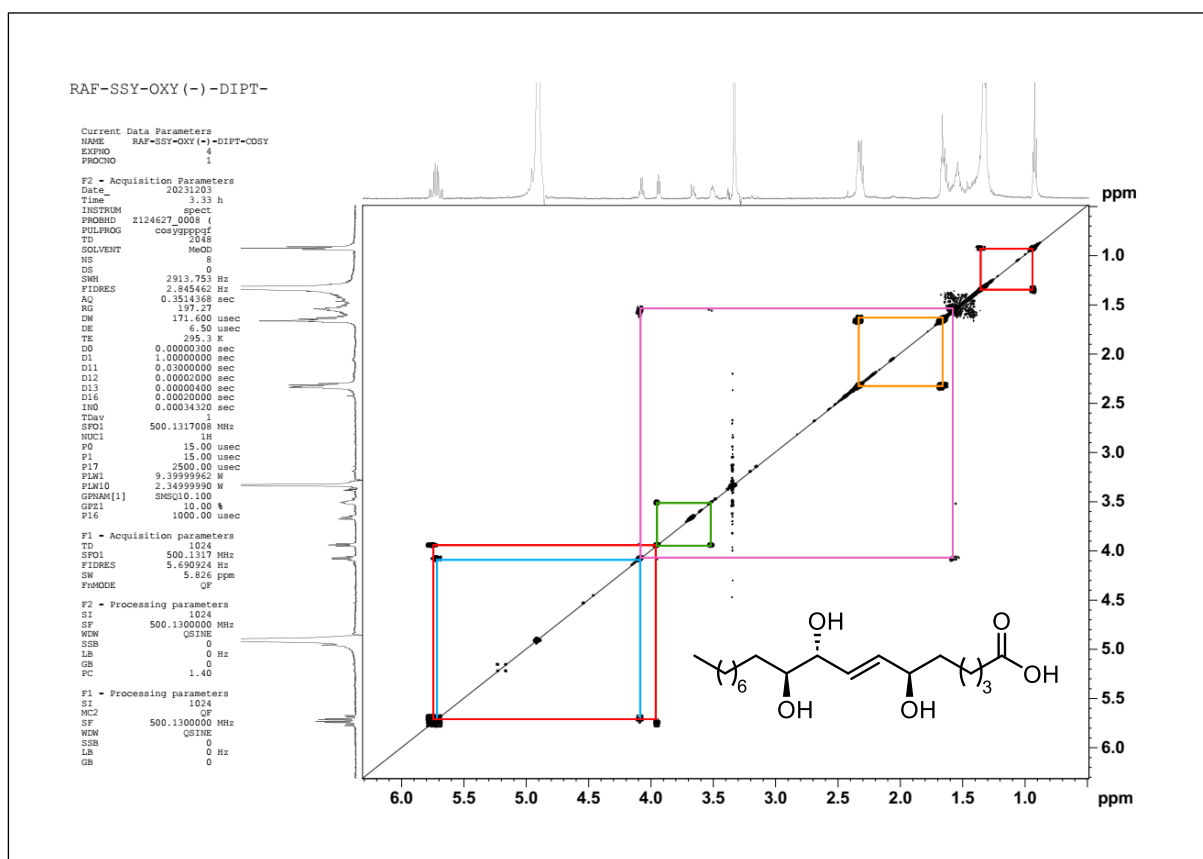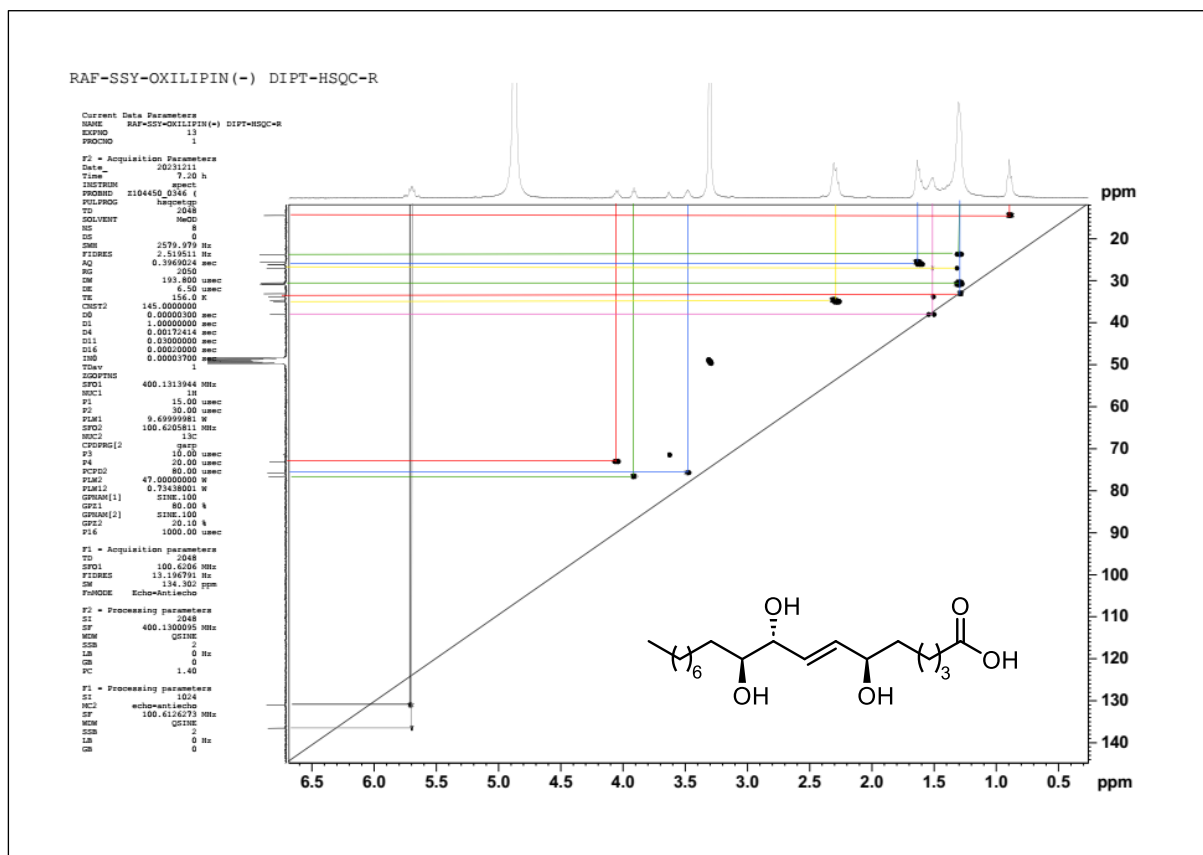

$^1\text{H}$  NMR (400 MHz,  $\text{CDCl}_3$ ) and  $^{13}\text{C}\{^1\text{H}\}$  NMR (100 MHz,  $\text{CDCl}_3$ ) of compound 7

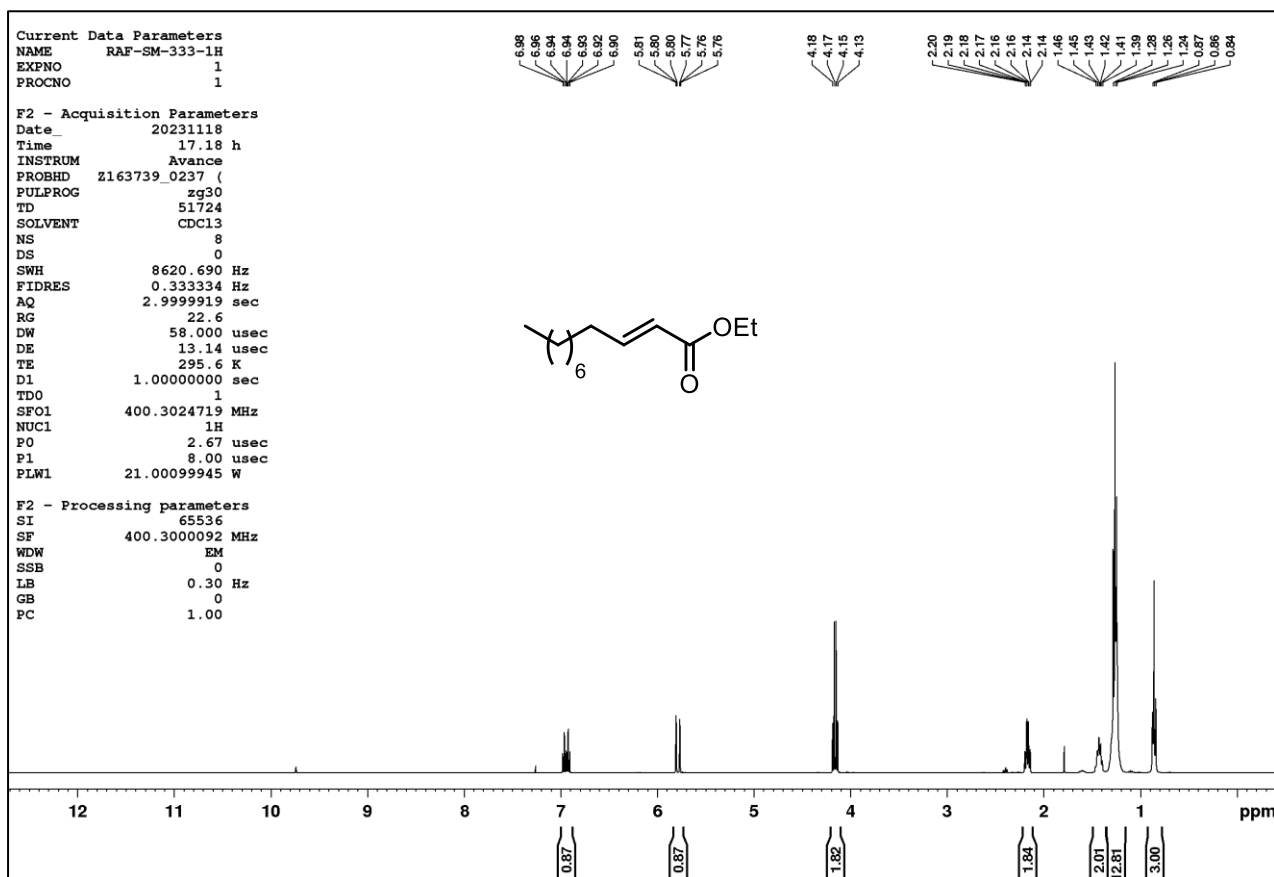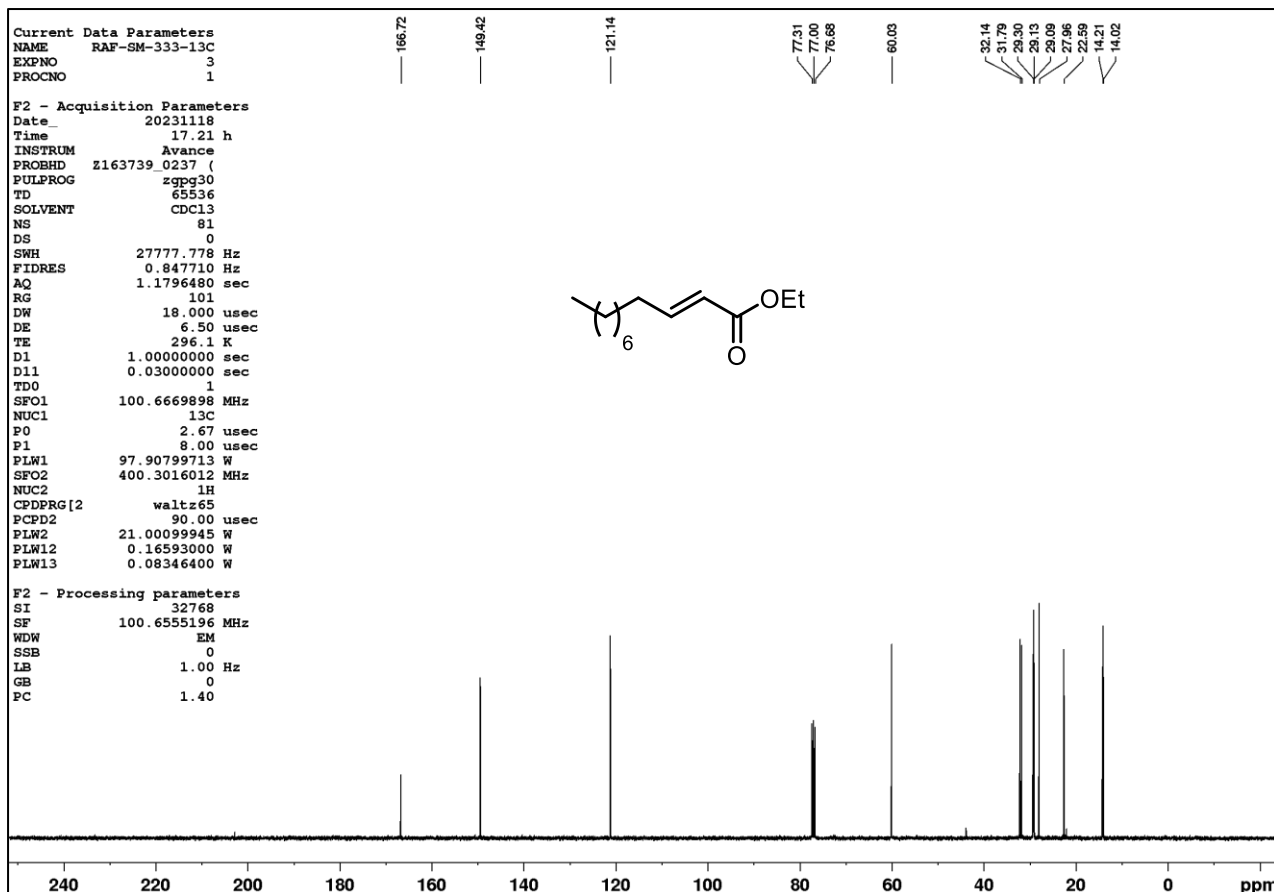

7: HRMS (ESI-TOF)  $m/z$ :  $[M + Na]^+$  Calcd for  $C_{13}H_{24}O_2Na$  235.1669; Found 235.1670.

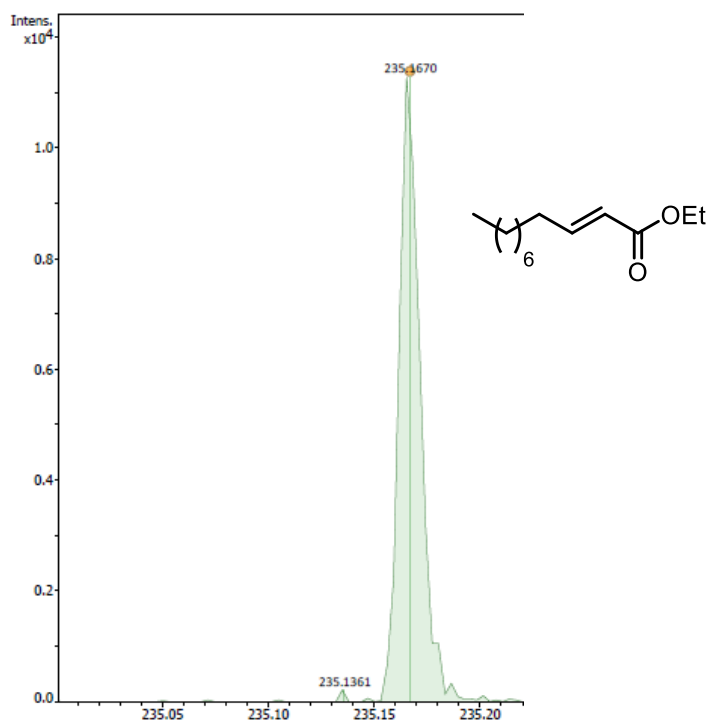

$^1\text{H}$  NMR (400 MHz,  $\text{CDCl}_3$ ) and  $^{13}\text{C}\{^1\text{H}\}$  NMR (100 MHz,  $\text{CDCl}_3$ ) of compound **13**

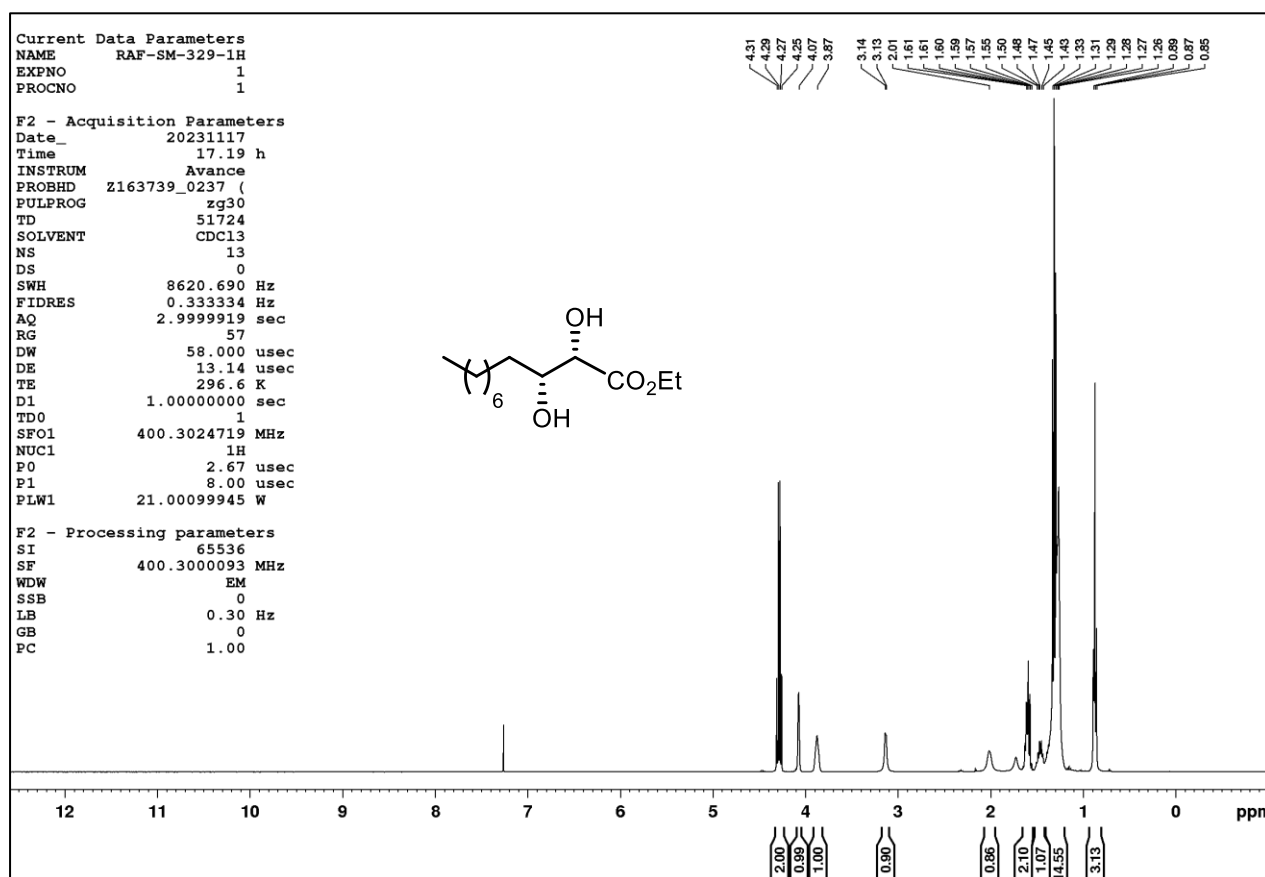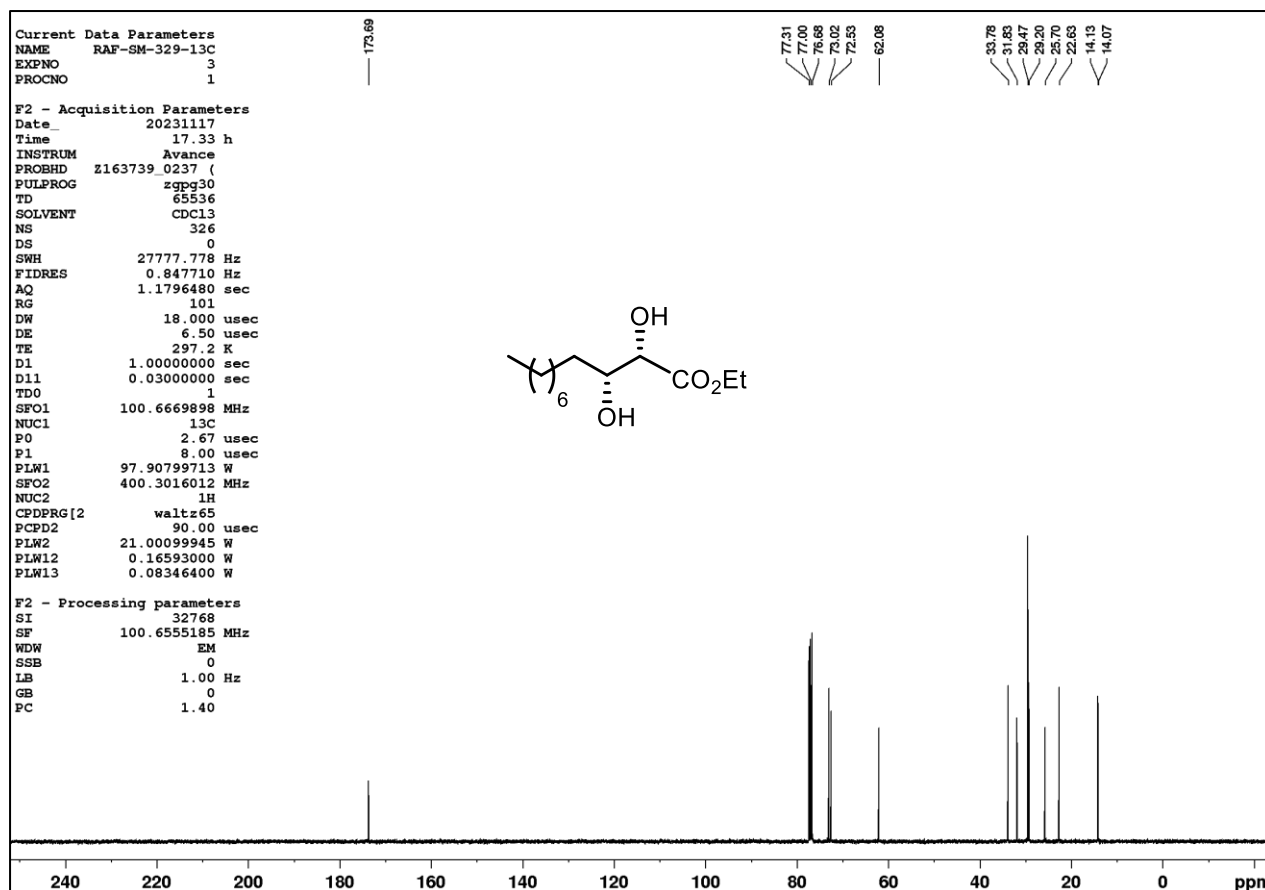

13: HRMS (ESI-TOF)  $m/z$ :  $[M + Na]^+$  Calcd for  $C_{13}H_{26}O_4Na$  269.1723; Found 269.1727

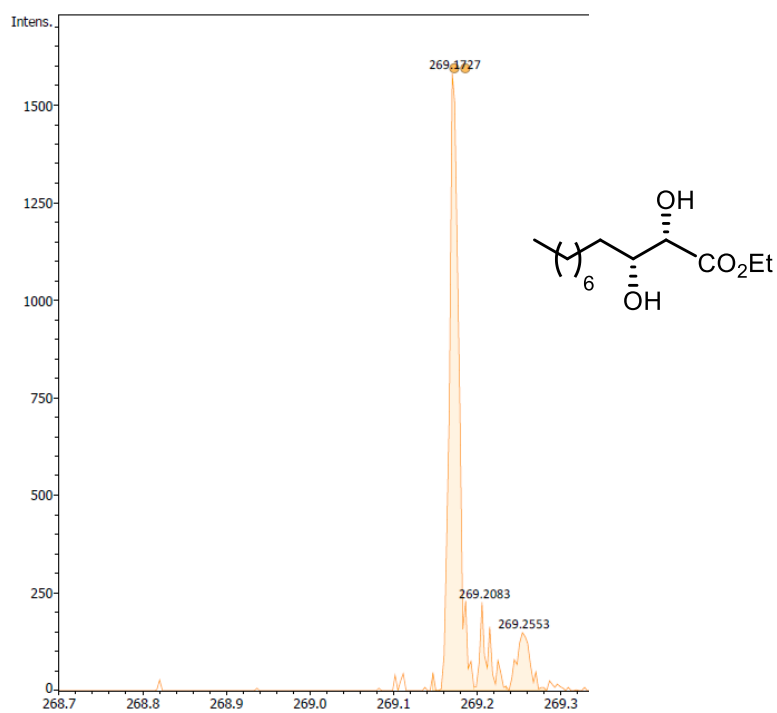

$^1\text{H}$  NMR (400 MHz,  $\text{CDCl}_3$ ) and  $^{13}\text{C}\{^1\text{H}\}$  NMR (100 MHz,  $\text{CDCl}_3$ ) of compound **13'**

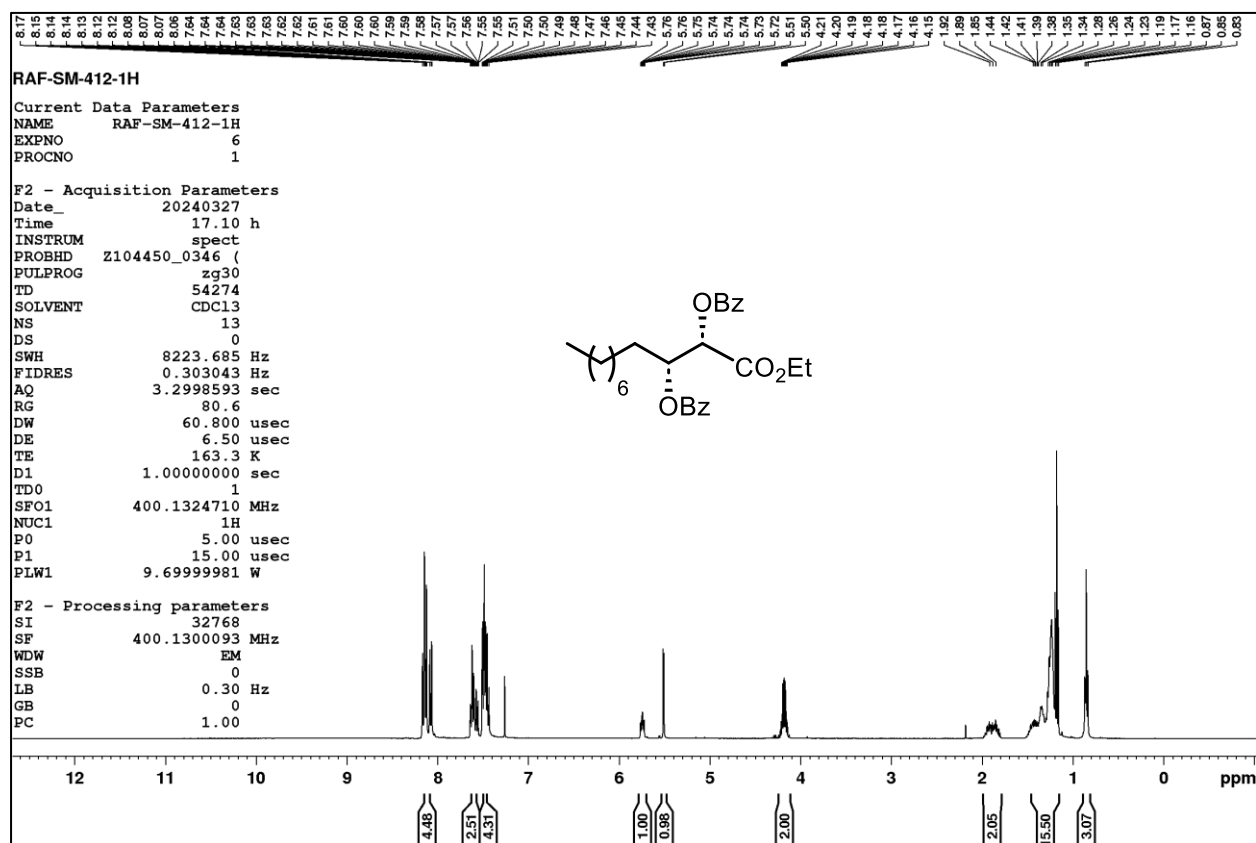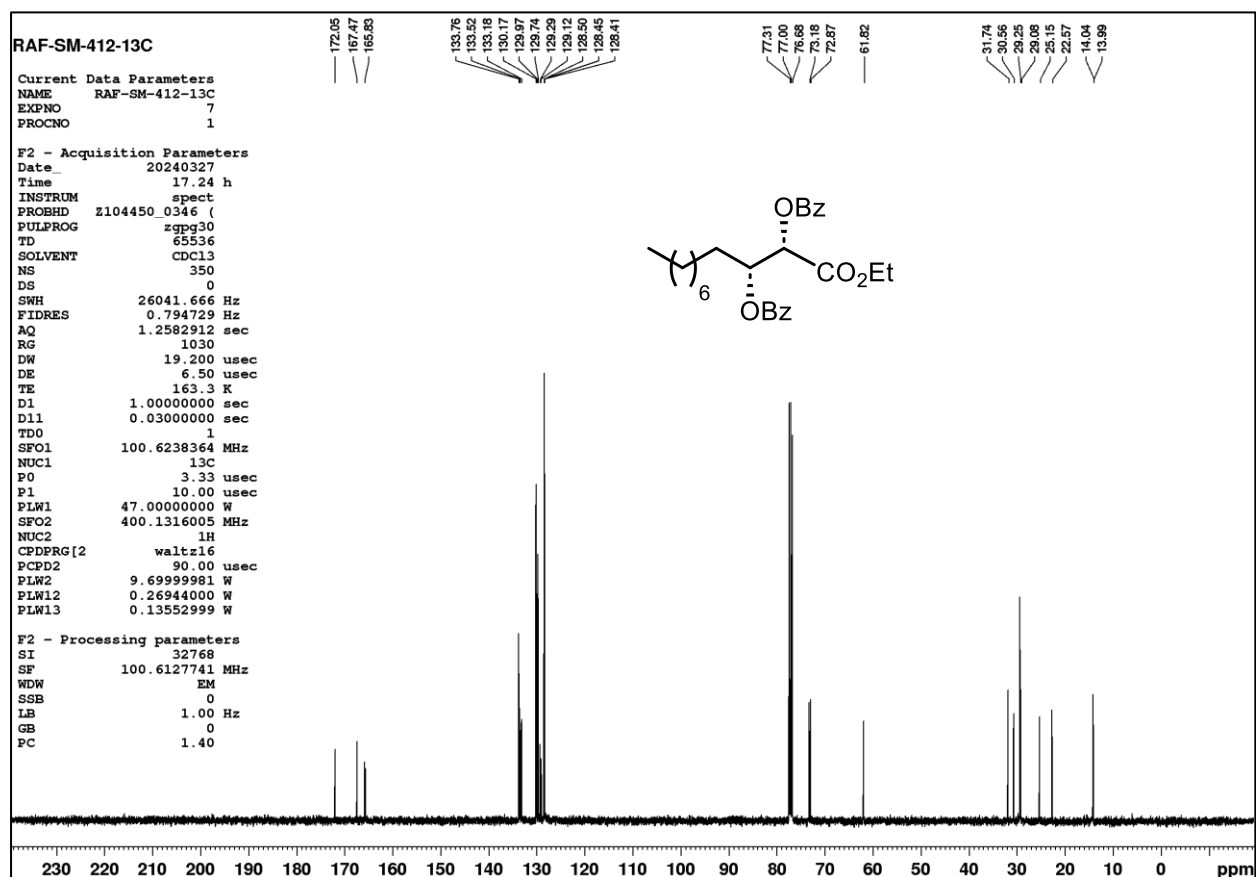

**13'**: HRMS (ESI-TOF)  $m/z$ :  $[M + Na]^+$  calcd for  $C_{27}H_{34}NaO_6$  477.2248; Found 477.2249.

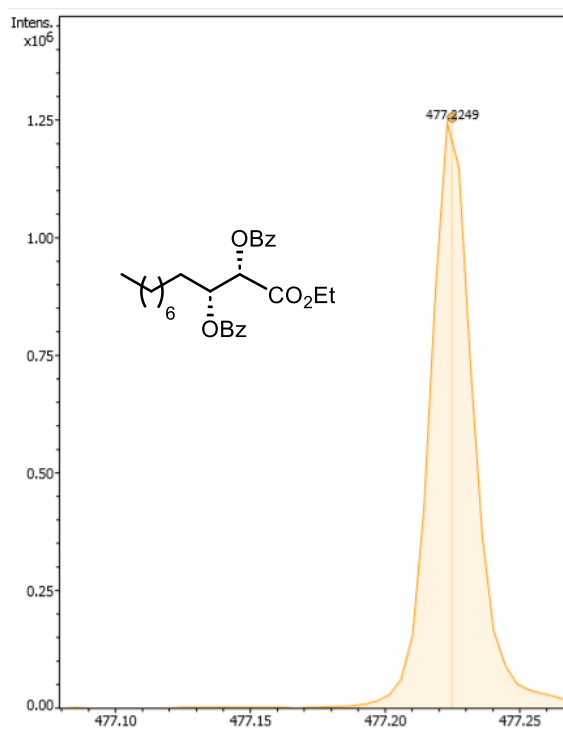

HPLC chromatograms of racemic and chiral **13'**

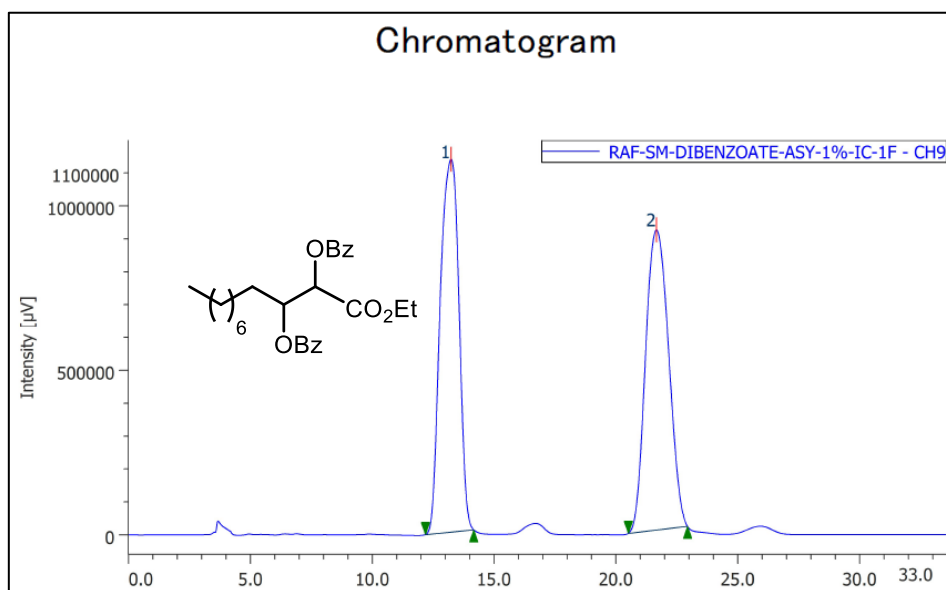

| #     | Peak Name | CH | tR [min] | Area [µV·sec] | Height [µV] | Area%  | Height% | Quantity | NTP  | Resolution | Symmetry Factor | Warning |
|-------|-----------|----|----------|---------------|-------------|--------|---------|----------|------|------------|-----------------|---------|
| 1     | Unknown   | 9  | 13.233   | 60237946      | 1132379     | 50.146 | 55.394  | N/A      | 1242 | 5.087      | 0.927           |         |
| 2     | Unknown   | 9  | 21.657   | 59886137      | 911843      | 49.854 | 44.606  | N/A      | 2269 | N/A        | 1.098           |         |
| Total |           |    |          | 120124083     | 2044222     |        |         | 0.00000  |      |            |                 |         |

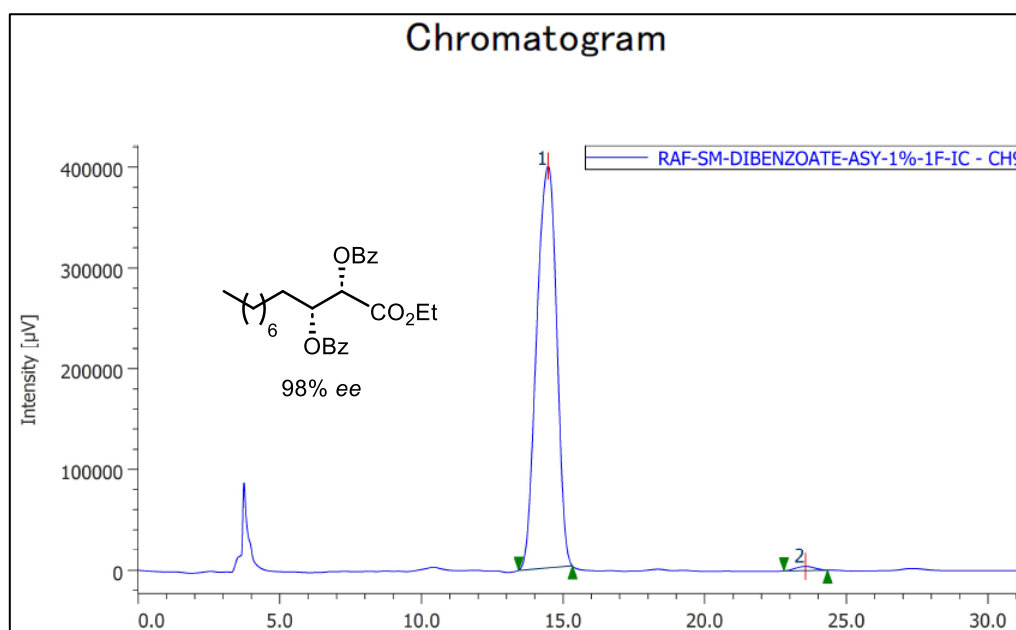

| #     | Peak Name | CH | tR [min] | Area [µV·sec] | Height [µV] | Area%  | Height% | Quantity | NTP  | Resolution | Symmetry Factor | Warning |
|-------|-----------|----|----------|---------------|-------------|--------|---------|----------|------|------------|-----------------|---------|
| 1     | Unknown   | 9  | 14.467   | 19530235      | 398402      | 99.040 | 98.973  | N/A      | 1800 | 6.910      | 0.913           |         |
| 2     | Unknown   | 9  | 23.547   | 189258        | 4135        | 0.960  | 1.027   | N/A      | 5490 | N/A        | 0.979           |         |
| Total |           |    |          | 19719493      | 402537      |        |         | 0.00000  |      |            |                 |         |



$^1\text{H}$  NMR (500 MHz,  $\text{CDCl}_3$ ) and  $^{13}\text{C}\{^1\text{H}\}$  NMR (100 MHz,  $\text{CDCl}_3$ ) of compound **14**

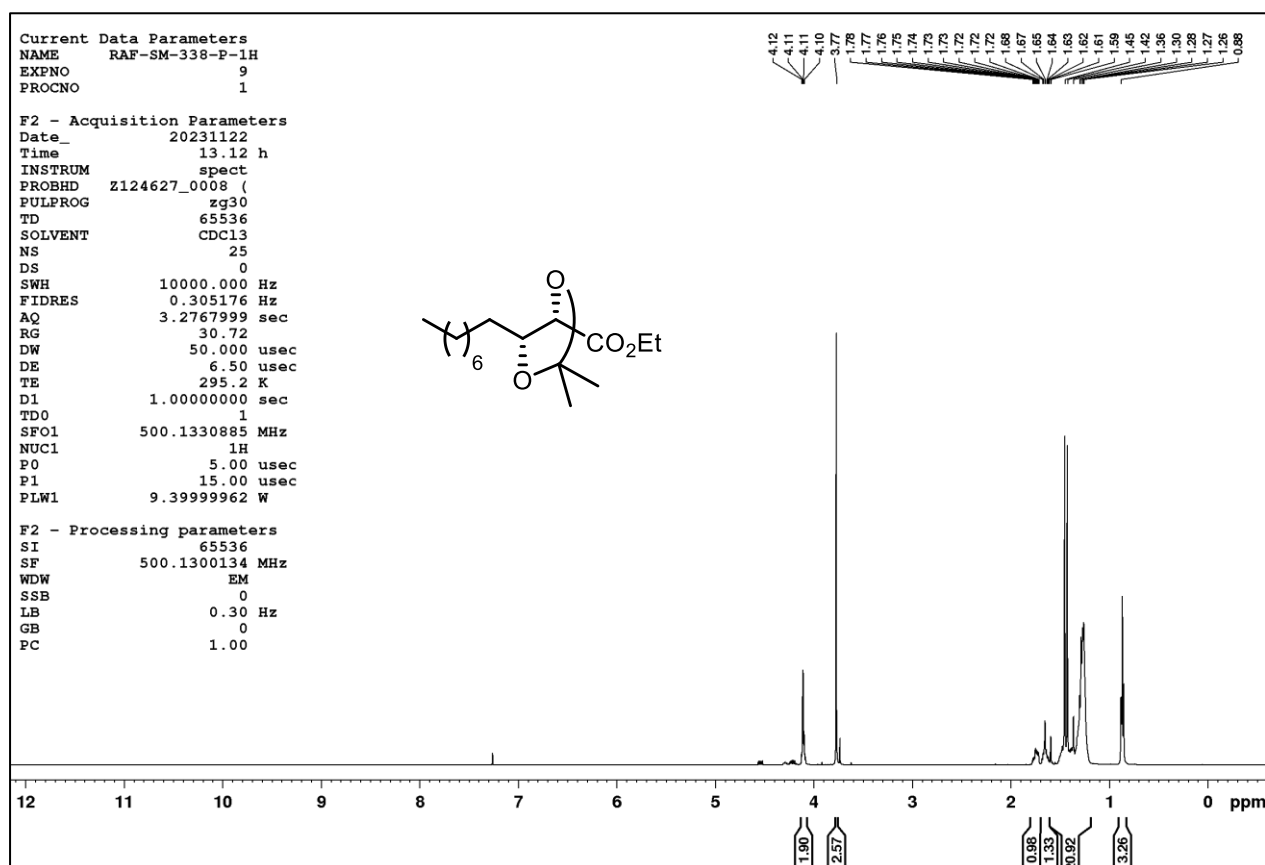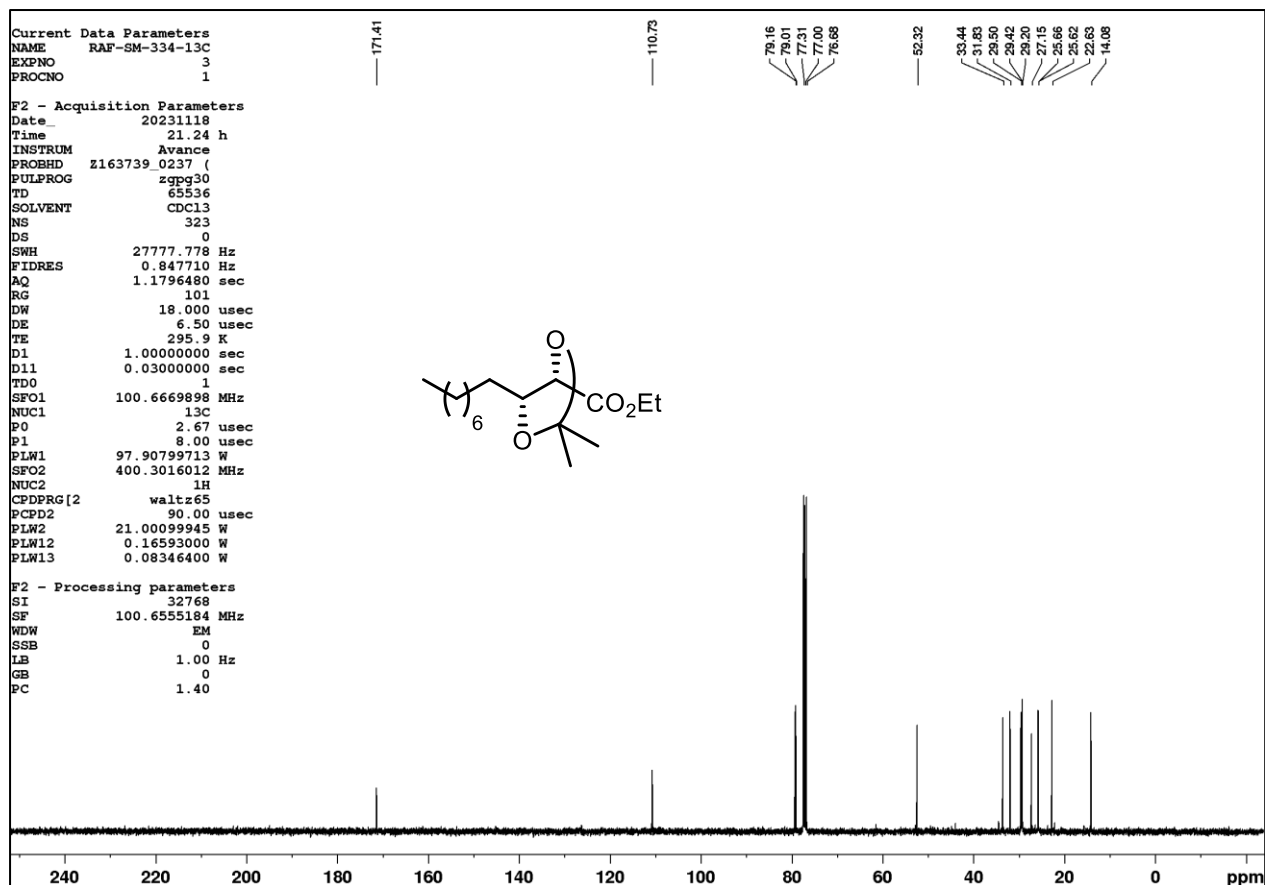

14: HRMS (ESI-TOF)  $m/z$ :  $[M + Na]^+$  Calcd for  $C_{16}H_{30}O_4Na$  309.2036; Found 309.2035

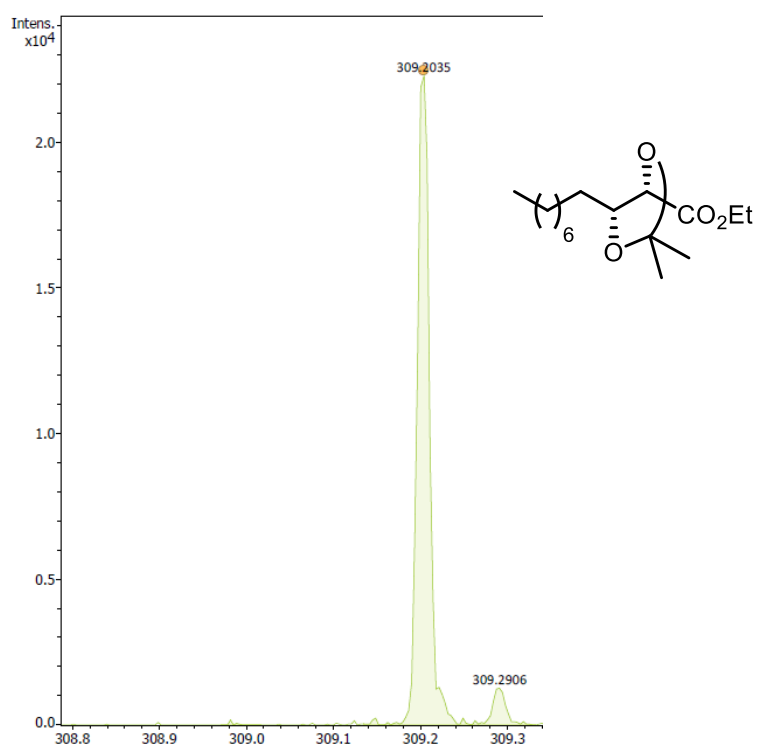

$^1\text{H}$  NMR (400 MHz,  $\text{CDCl}_3$ ) and  $^{13}\text{C}\{^1\text{H}\}$  NMR (100 MHz,  $\text{CDCl}_3$ ) of compound 6

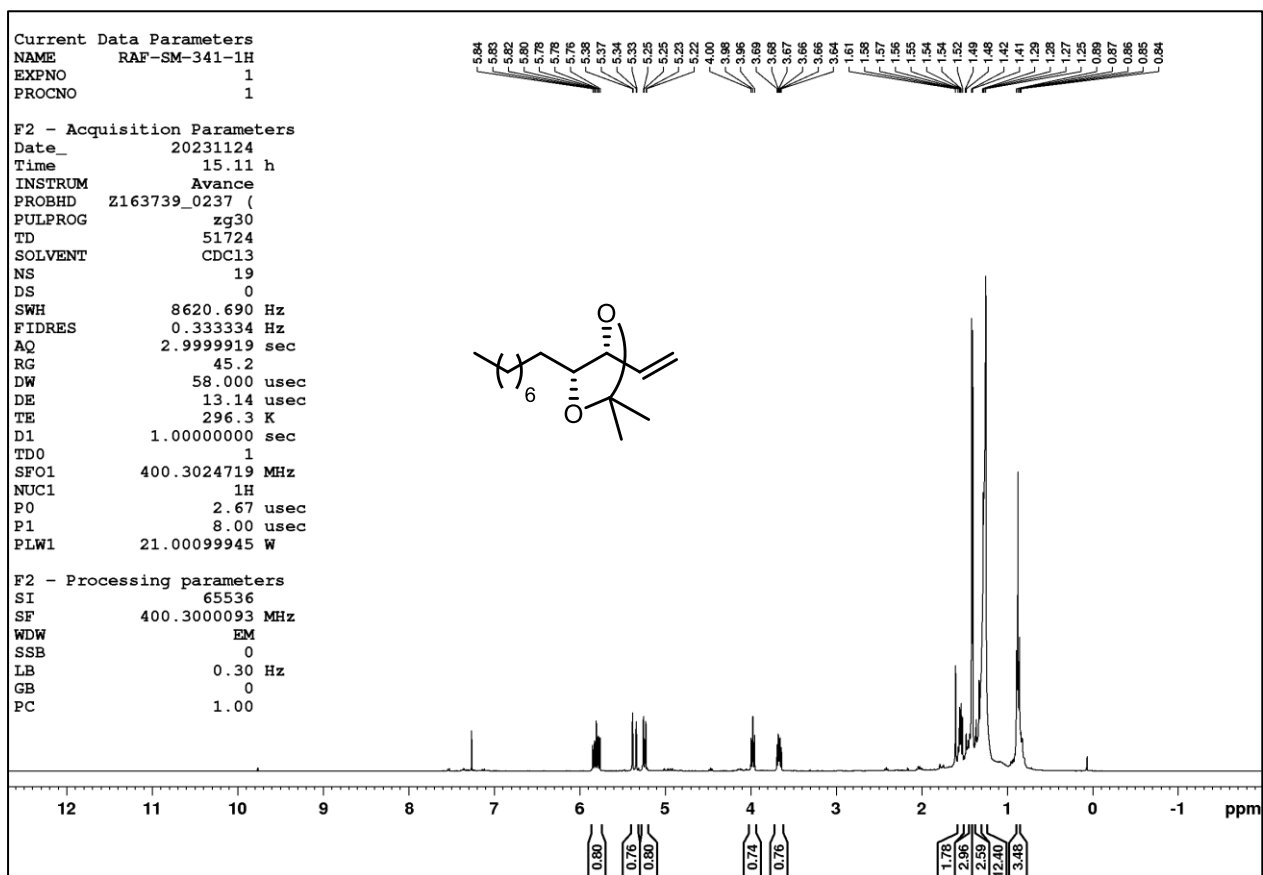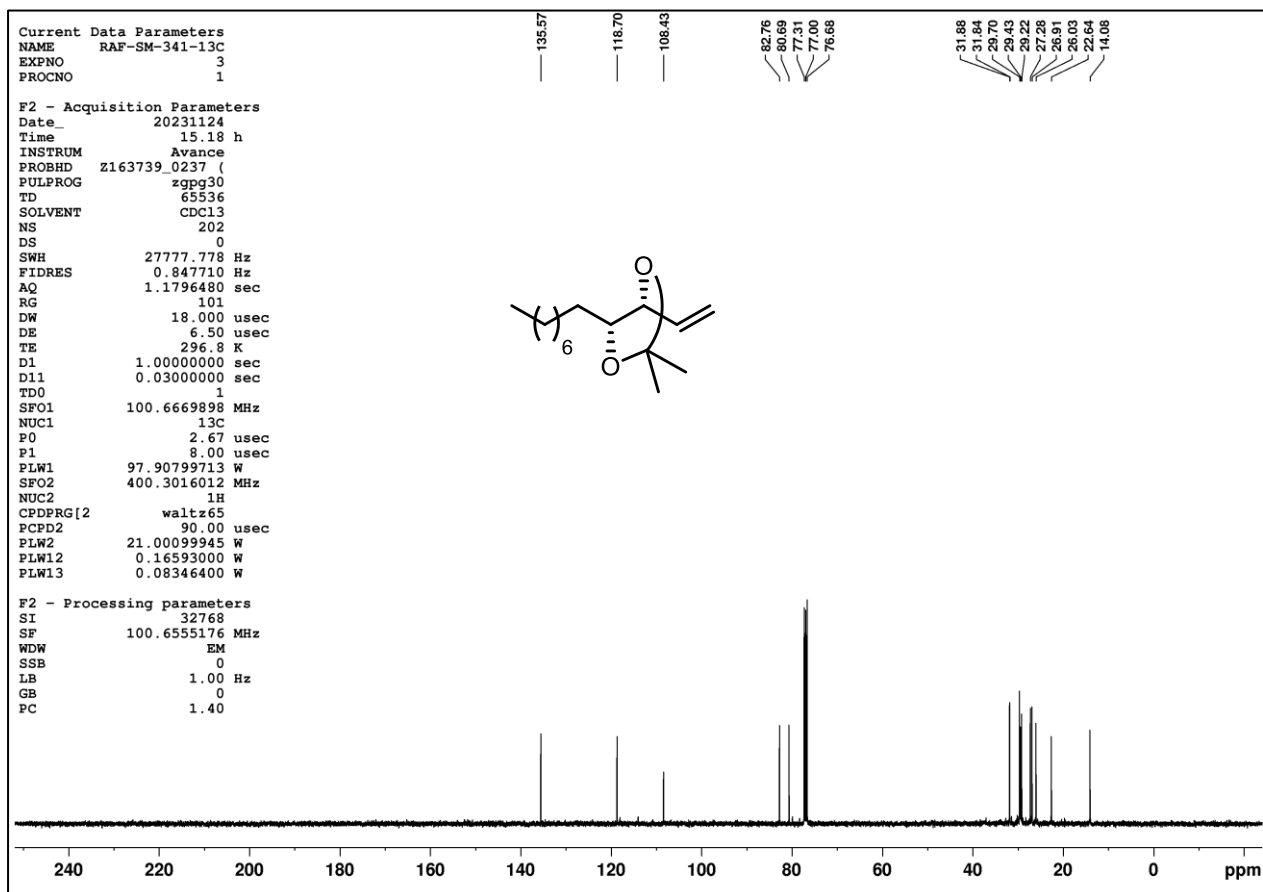

6: HRMS (ESI-TOF)  $m/z$ :  $[M + H]^+$  Calcd for  $C_{15}H_{29}O_2$  241.2162; Found 241.2161

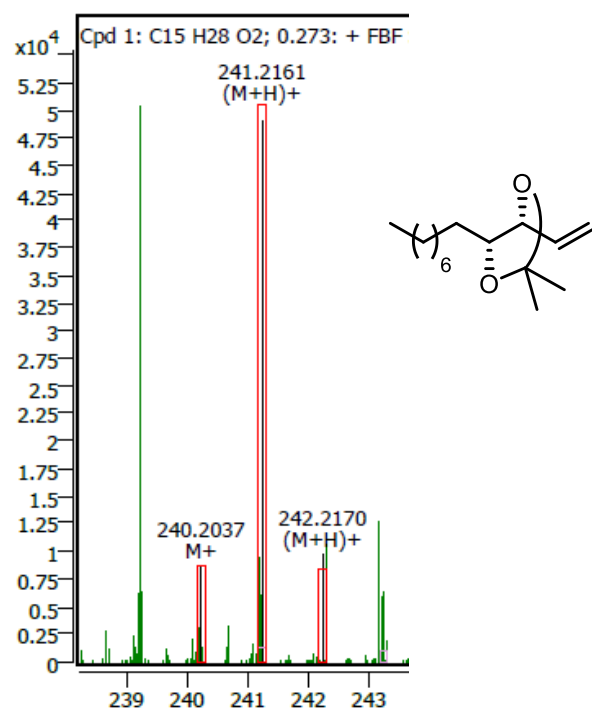

$^1\text{H}$  NMR (400 MHz,  $\text{CD}_3\text{OD}$ ) and  $^{13}\text{C}\{^1\text{H}\}$  NMR (100 MHz,  $\text{CD}_3\text{OD}$ ) spectra of compound **1c**

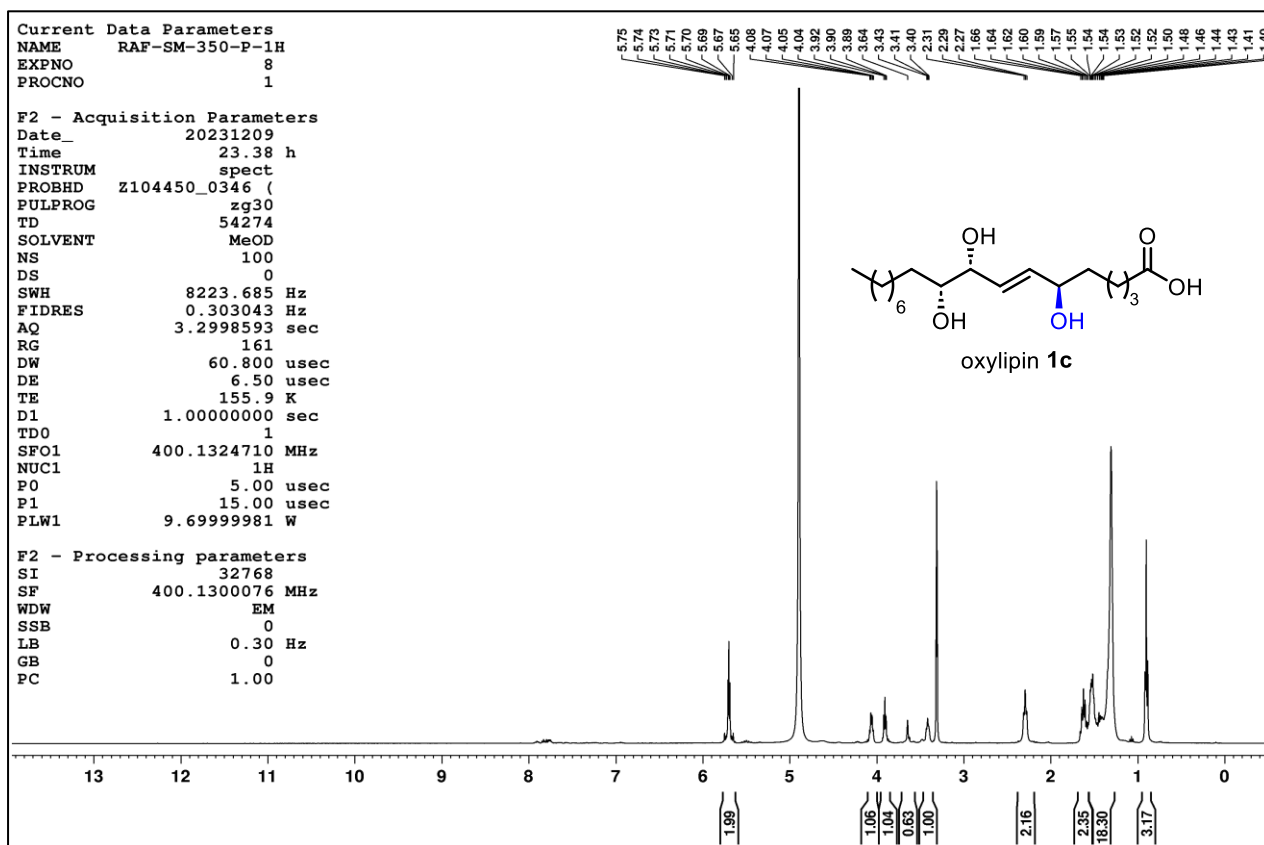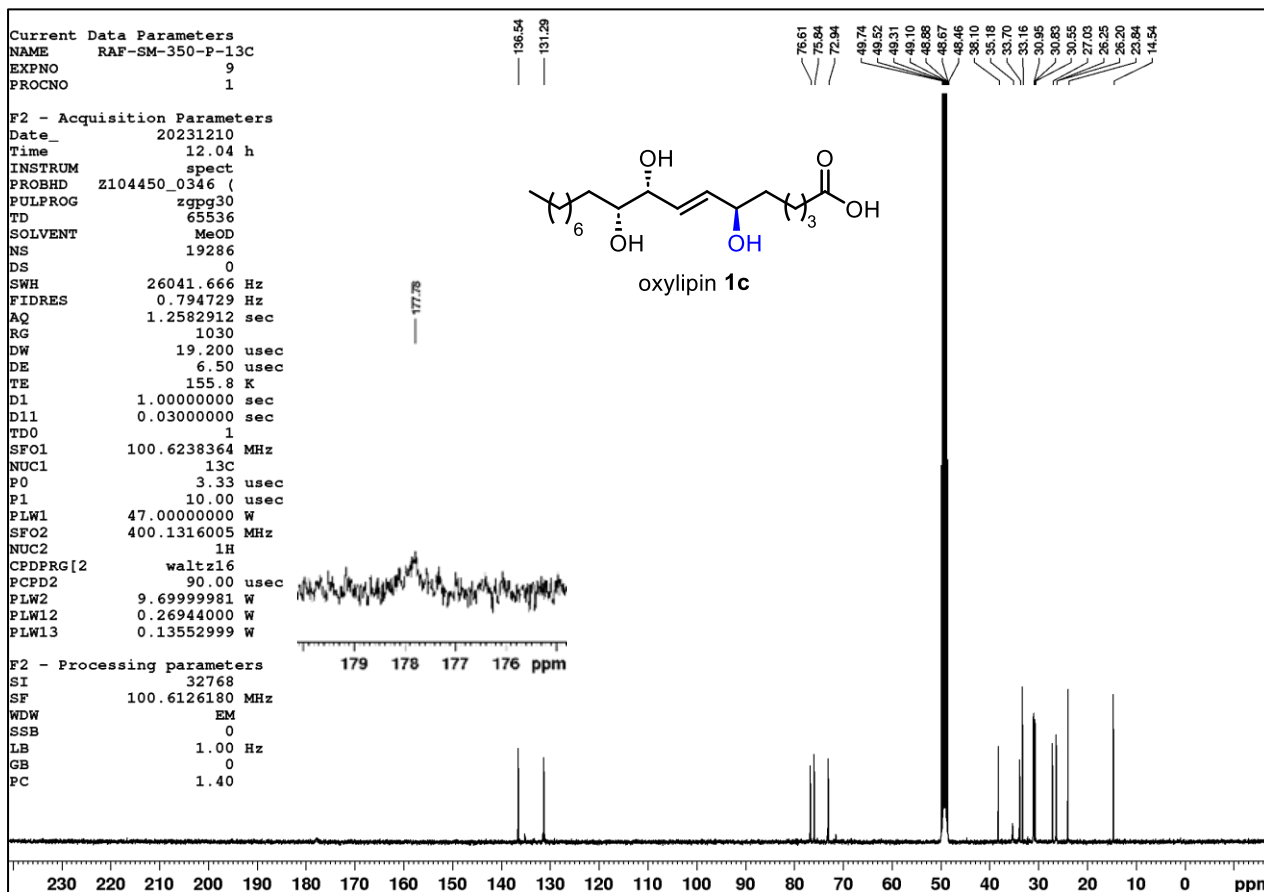

COSY and HSQC of compound 1c

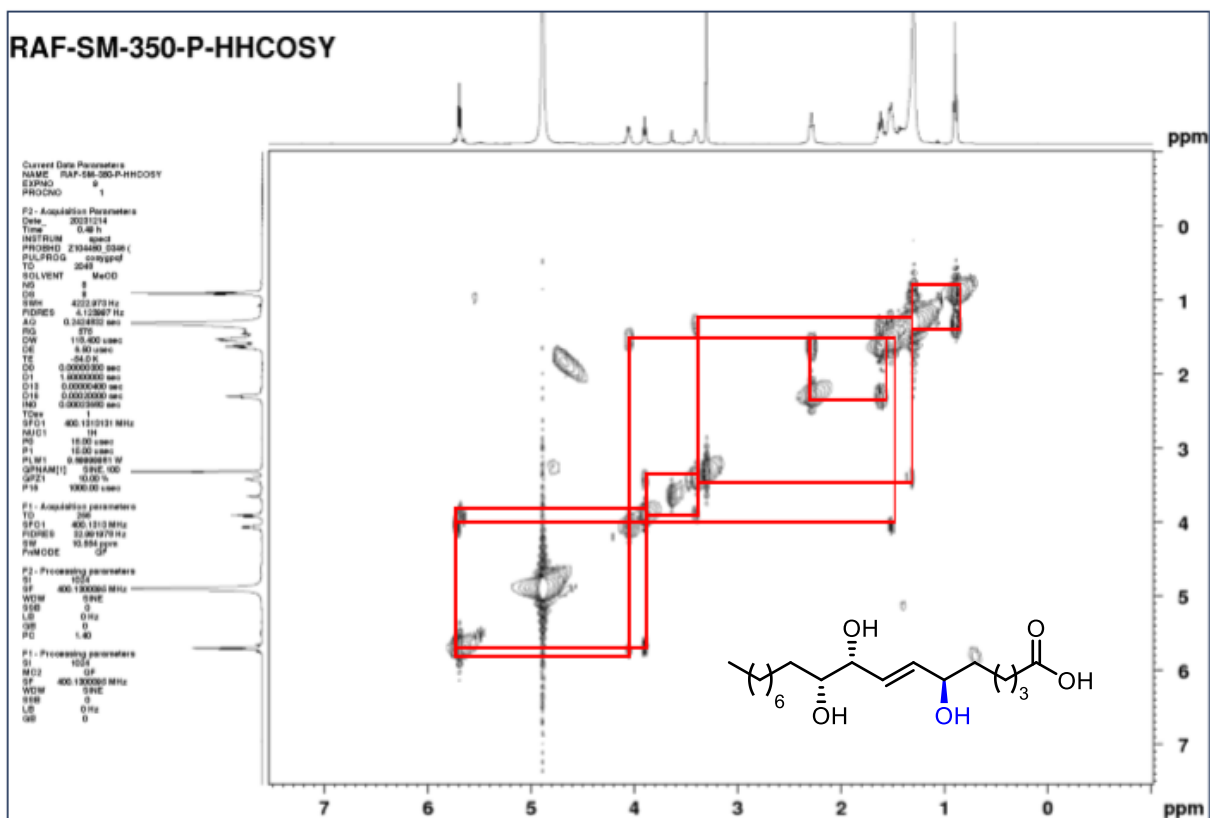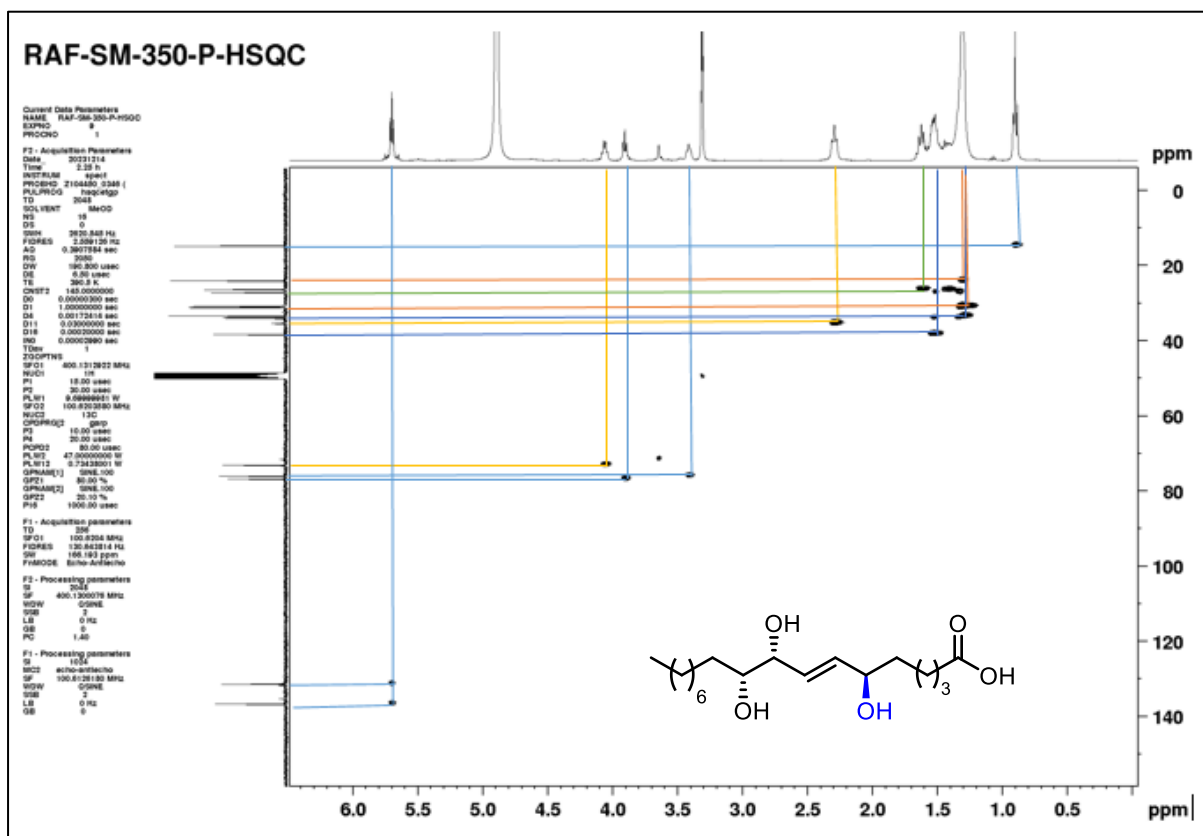

**1c:** HRMS (ESI-TOF)  $m/z$ :  $[M + Na]^+$  Calcd for  $C_{18}H_{34}O_5Na$  353.2298; Found 353.2296

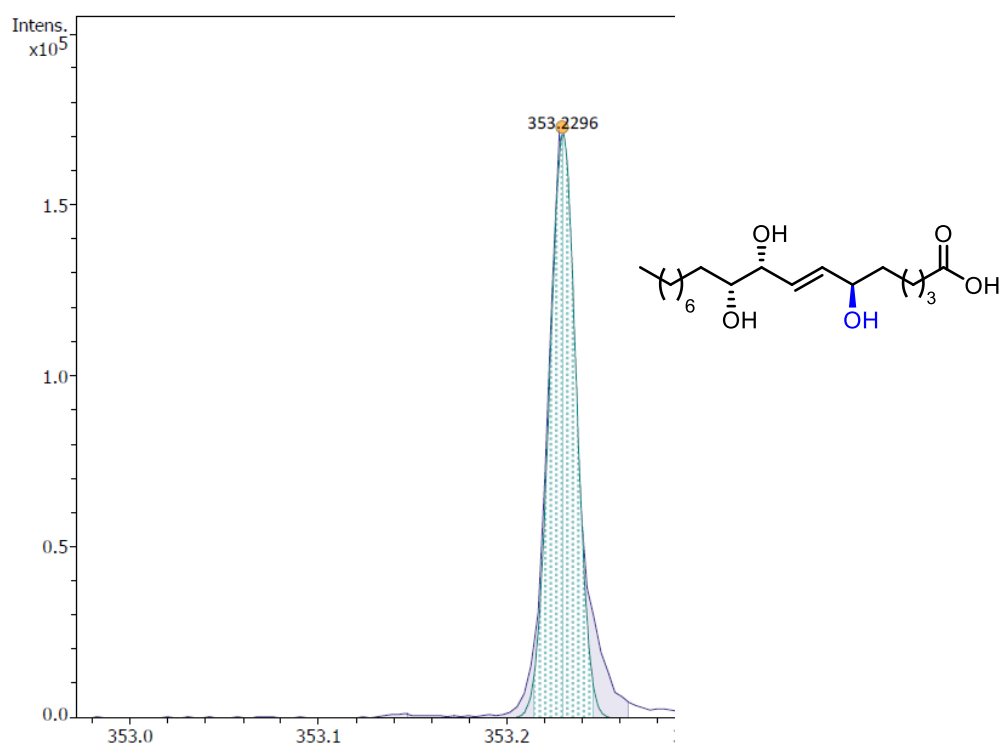

H NMR (400 MHz, CD<sub>3</sub>OD) and <sup>13</sup>C{<sup>1</sup>H} NMR (100 MHz, CD<sub>3</sub>OD) spectra of compound **1d**

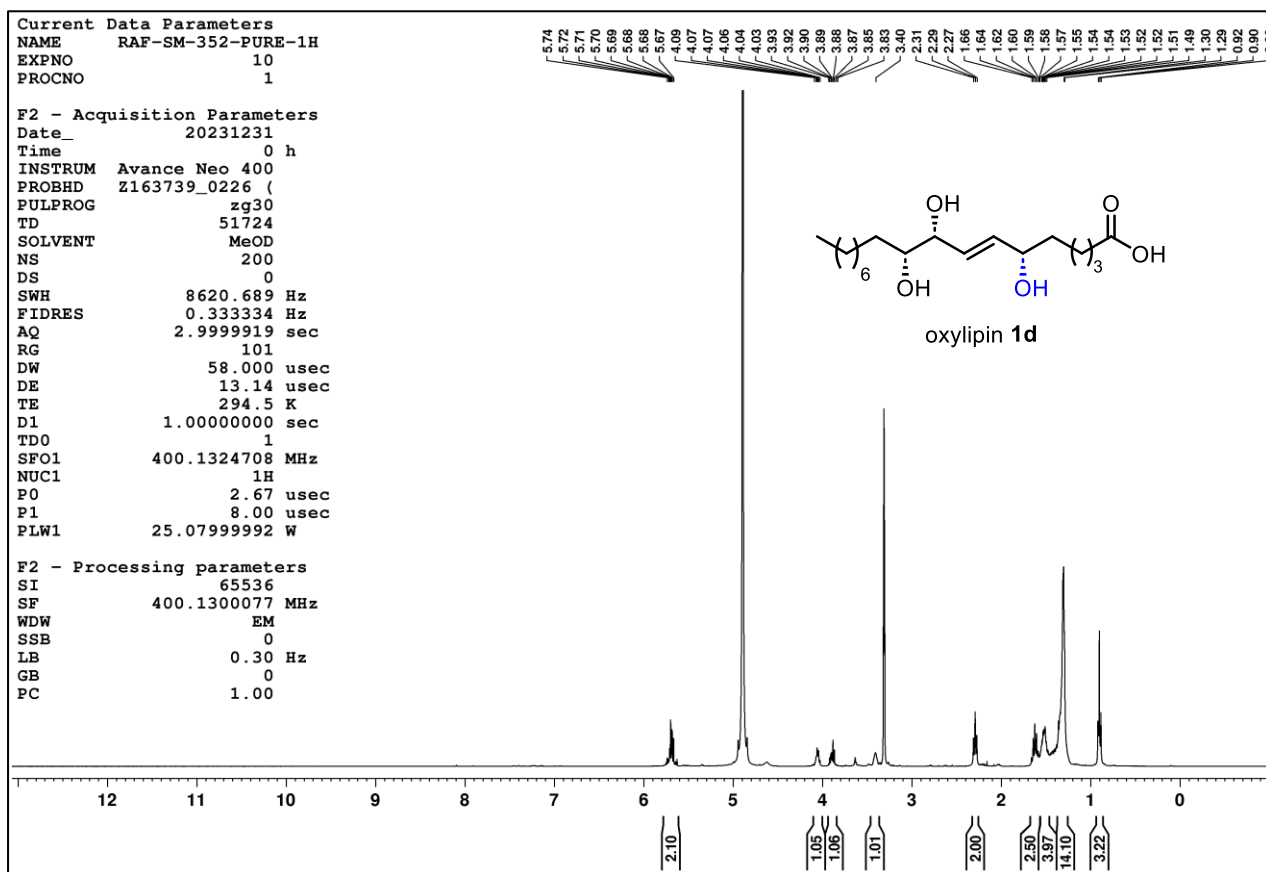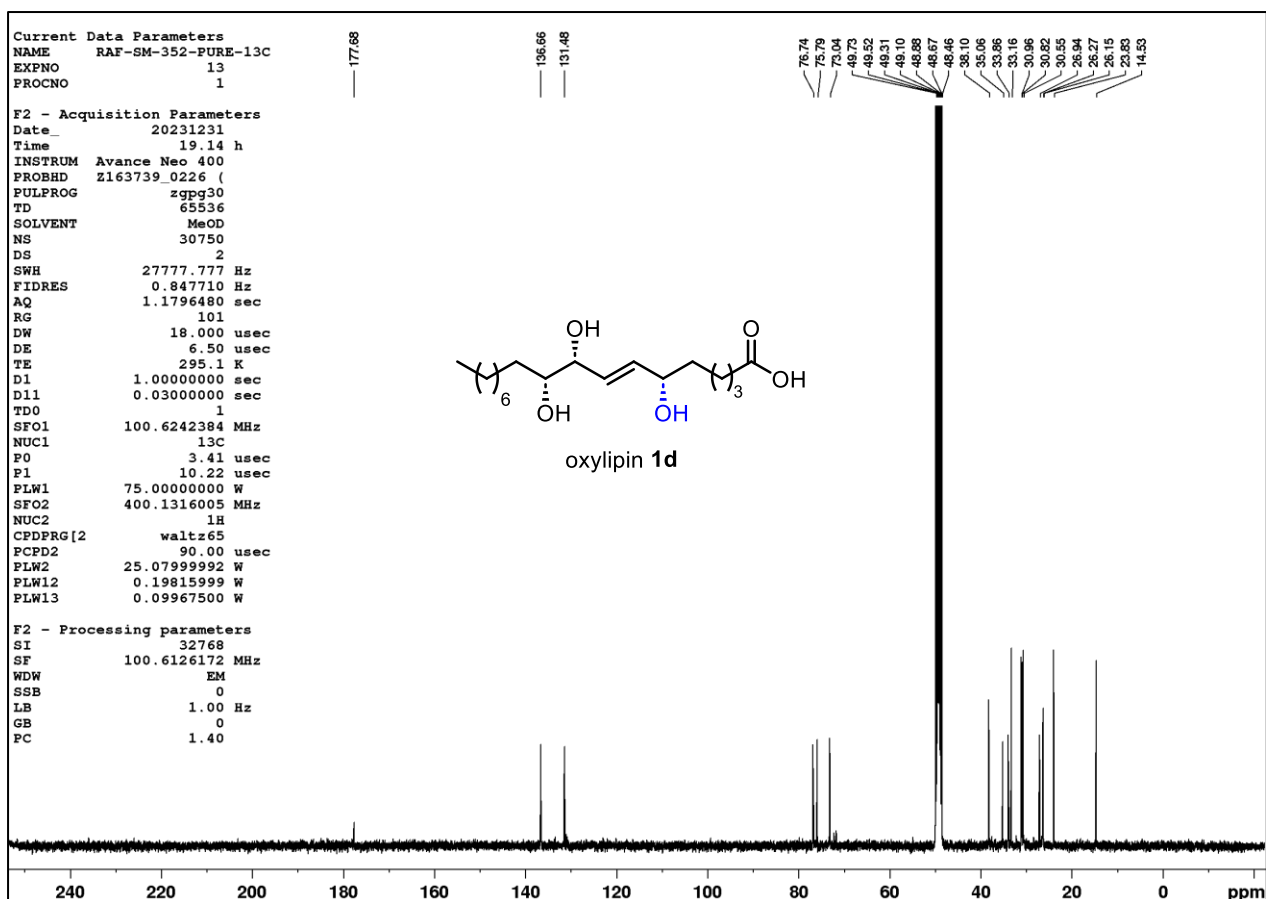



# COSY and NOESY of compound 1d

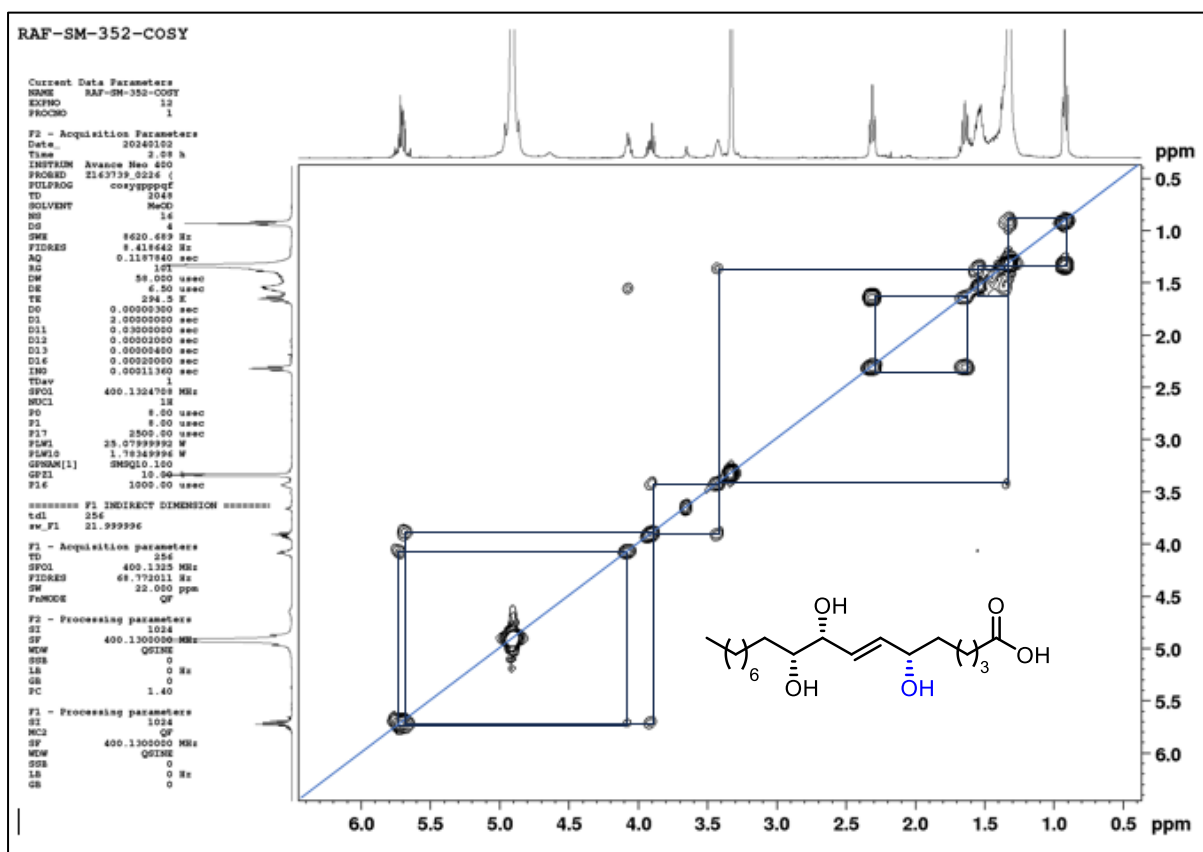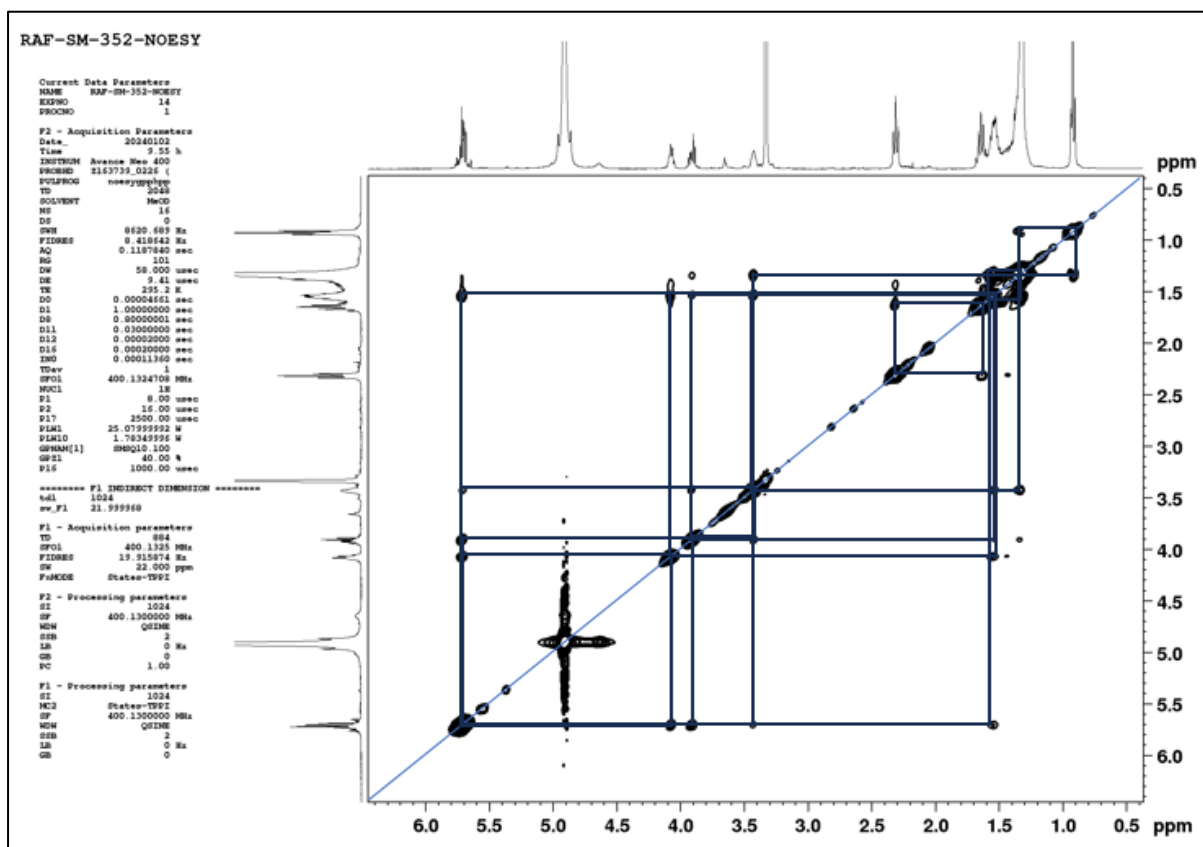

**1d**: HRMS (ESI-TOF)  $m/z$ :  $[M + Na]^+$  Calcd for  $C_{18}H_{34}O_5Na$  353.2298; Found 353.2302

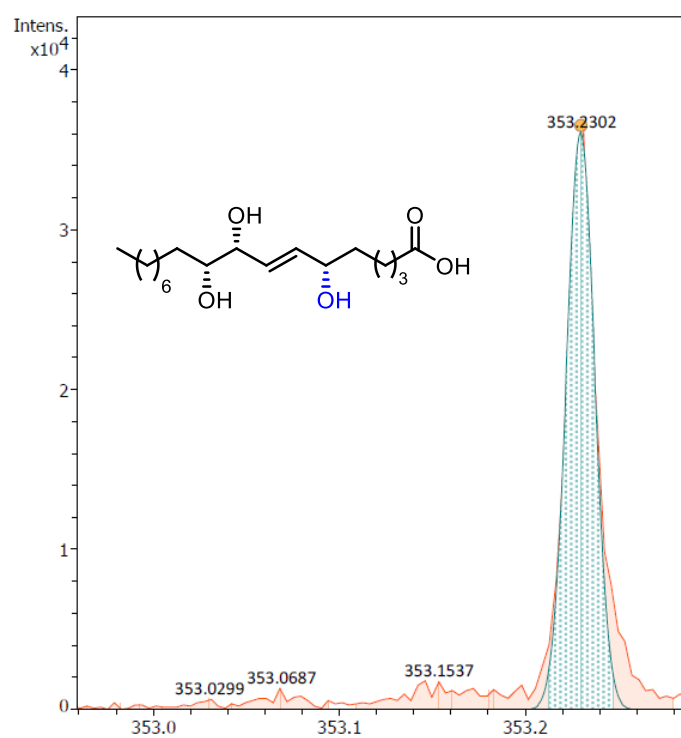

Supplement: d4ob00282b1.pdf [file d4ob00282b1.pdf]
